# Supplementary material
Source: PubMed Central journal article supplement (PMC6877777)
Supplement: bor_supplemental_table_1_ioz134.pdf [file bor_supplemental_table_1_ioz134.pdf]

**Supplemental Table 1:** RNA sequencing results of TGFβ1-treated mOSE cells (10 ng/mL, 96 hr).

| target_id          | ext_gene      | qval        | b           |
|--------------------|---------------|-------------|-------------|
| ENSMUSG00000052468 | Pmp2          | 1.53E-53    | 5.708289386 |
| ENSMUSG00000049538 | Adamts16      | 1.22E-42    | 5.238696715 |
| ENSMUSG00000067719 | Gm10221       | 2.53E-05    | 4.718171329 |
| ENSMUSG00000031825 | Crispld2      | 7.09E-26    | 4.594276042 |
| ENSMUSG00000057457 | Phex          | 4.50E-25    | 4.480983579 |
| ENSMUSG00000045092 | S1pr1         | 1.46E-101   | 4.106988875 |
| ENSMUSG00000024910 | Ctsw          | 3.87E-19    | 4.005590833 |
| ENSMUSG00000041449 | Serpina3h     | 0.000117311 | 3.962904407 |
| ENSMUSG00000025746 | Il6           | 0.000230315 | 3.903470857 |
| ENSMUSG00000028591 | Pramef12      | 2.88E-22    | 3.879666606 |
| ENSMUSG00000029272 | Sult1e1       | 5.14E-21    | 3.867397112 |
| ENSMUSG00000027966 | Col11a1       | 2.85E-15    | 3.71601464  |
| ENSMUSG00000041482 | Piezo2        | 2.68E-76    | 3.681192174 |
| ENSMUSG00000022367 | Has2          | 6.98E-45    | 3.670726833 |
| ENSMUSG00000066363 | Serpina3f     | 5.58E-08    | 3.59219141  |
| ENSMUSG00000032122 | Slc37a2       | 2.50E-37    | 3.565018889 |
| ENSMUSG00000024620 | Pdgfrb        | 3.87E-06    | 3.388846758 |
| ENSMUSG00000042190 | Cmklr1        | 1.93E-08    | 3.292349533 |
| ENSMUSG00000022321 | Cdh10         | 4.09E-06    | 3.275928025 |
| ENSMUSG00000036594 | H2-Aa         | 3.27E-14    | 3.27520245  |
| ENSMUSG00000024670 | Cd6           | 1.53E-10    | 3.197324013 |
| ENSMUSG00000026468 | Lhx4          | 6.11E-11    | 3.189381302 |
| ENSMUSG00000031994 | Adamts8       | 2.26E-10    | 3.177413343 |
| ENSMUSG00000033122 | Hsd17b3       | 1.83E-05    | 3.164497807 |
| ENSMUSG00000073421 | H2-Ab1        | 1.74E-07    | 3.156356029 |
| ENSMUSG00000026228 | Htr2b         | 1.09E-06    | 3.151096013 |
| ENSMUSG00000001506 | Col1a1        | 2.15E-73    | 3.133898971 |
| ENSMUSG00000044258 | Ctla2a        | 1.61E-46    | 3.097522888 |
| ENSMUSG00000042436 | Mfap4         | 7.96E-10    | 3.075423019 |
| ENSMUSG00000079014 | Serpina3i     | 3.54E-05    | 3.072523512 |
| ENSMUSG00000041605 | 5730559C18Rik | 6.71E-08    | 3.062598476 |
| ENSMUSG00000047746 | Fbxo40        | 2.56E-08    | 3.042474717 |
| ENSMUSG00000024365 | Cyp21a1       | 2.87E-12    | 3.028447423 |
| ENSMUSG00000032172 | Olfm2         | 5.90E-11    | 3.014984777 |
| ENSMUSG00000031780 | Ccl17         | 0.000105906 | 2.985131364 |
| ENSMUSG00000020216 | Jsrp1         | 8.44E-08    | 2.954491223 |
| ENSMUSG00000026424 | Gpr37l1       | 1.70E-07    | 2.931312691 |
| ENSMUSG00000037568 | Vash2         | 4.27E-14    | 2.922863288 |
| ENSMUSG00000021904 | Sema3g        | 3.57E-05    | 2.915754527 |
| ENSMUSG00000033207 | Mamdc2        | 1.05E-09    | 2.88228498  |
| ENSMUSG00000026480 | Ncf2          | 9.33E-25    | 2.859143484 |
| ENSMUSG00000058883 | Zfp708        | 0.024047621 | 2.859020628 |
| ENSMUSG00000048779 | P2ry6         | 3.94E-29    | 2.852156    |
| ENSMUSG00000022382 | Wnt7b         | 5.48E-26    | 2.807981424 |
| ENSMUSG00000041481 | Serpina3g     | 1.78E-05    | 2.797083819 |

|                    |            |             |             |
|--------------------|------------|-------------|-------------|
| ENSMUSG00000024697 | Gna14      | 1.47E-07    | 2.796577893 |
| ENSMUSG00000024176 | Sox8       | 7.01E-10    | 2.714596173 |
| ENSMUSG00000029861 | Fam131b    | 1.17E-07    | 2.705922459 |
| ENSMUSG00000048142 | Nat8l      | 6.76E-15    | 2.698330489 |
| ENSMUSG00000035357 | Pdzrn3     | 4.61E-10    | 2.694375424 |
| ENSMUSG00000020399 | Havcr2     | 2.33E-09    | 2.643520894 |
| ENSMUSG00000021062 | Rab15      | 7.54E-05    | 2.62199443  |
| ENSMUSG00000062515 | Fabp4      | 4.18E-19    | 2.618249671 |
| ENSMUSG00000020053 | Igf1       | 2.14E-51    | 2.594156126 |
| ENSMUSG00000048939 | Atp13a5    | 1.33E-07    | 2.576465767 |
| ENSMUSG00000006403 | Adamts4    | 9.69E-24    | 2.573597894 |
| ENSMUSG00000032036 | Kirrel3    | 5.91E-34    | 2.55339913  |
| ENSMUSG00000032281 | Acsbg1     | 4.62E-38    | 2.539719363 |
| ENSMUSG00000076441 | Ass1       | 5.11E-06    | 2.536410807 |
| ENSMUSG00000025270 | Alas2      | 7.76E-07    | 2.470327391 |
| ENSMUSG00000015533 | Itga2      | 0.035679447 | 2.44162887  |
| ENSMUSG00000027356 | Fermt1     | 0.000399275 | 2.438557589 |
| ENSMUSG00000070866 | Zfp804a    | 4.25E-05    | 2.41894789  |
| ENSMUSG00000021256 | Vash1      | 4.83E-12    | 2.389407919 |
| ENSMUSG00000037411 | Serpine1   | 8.60E-09    | 2.354182852 |
| ENSMUSG00000025743 | Sdc3       | 4.12E-13    | 2.350281051 |
| ENSMUSG00000027435 | Cd93       | 1.96E-13    | 2.346824307 |
| ENSMUSG00000013921 | Clip3      | 7.19E-07    | 2.330385378 |
| ENSMUSG00000004891 | Nes        | 1.29E-05    | 2.327950982 |
| ENSMUSG00000022887 | Masp1      | 5.04E-07    | 2.323868726 |
| ENSMUSG00000004105 | Angptl2    | 7.21E-06    | 2.294344585 |
| ENSMUSG00000020437 | Myo1g      | 1.50E-10    | 2.282342569 |
| ENSMUSG00000000120 | Ngfr       | 2.46E-05    | 2.281860183 |
| ENSMUSG00000025610 | Map3k7cl   | 0.00022471  | 2.279585488 |
| ENSMUSG00000030616 | Sytl2      | 1.06E-38    | 2.223374452 |
| ENSMUSG00000015957 | Wnt11      | 1.24E-22    | 2.216689816 |
| ENSMUSG00000025017 | Pik3ap1    | 0.000439888 | 2.21632623  |
| ENSMUSG00000019122 | Ccl9       | 0.000296445 | 2.205749252 |
| ENSMUSG00000048616 | Nog        | 3.05E-05    | 2.204601131 |
| ENSMUSG00000046157 | Tmem229b   | 3.23E-19    | 2.196171829 |
| ENSMUSG00000004791 | Pgf        | 0.000530353 | 2.180101681 |
| ENSMUSG00000033998 | Kcnk1      | 2.87E-09    | 2.155380027 |
| ENSMUSG00000035246 | Pcyt1b     | 4.55E-33    | 2.154768219 |
| ENSMUSG00000038677 | Scube3     | 6.53E-55    | 2.142437384 |
| ENSMUSG00000027204 | Fbn1       | 1.44E-11    | 2.113142291 |
| ENSMUSG00000114432 | AC160962.1 | 3.01E-20    | 2.112583869 |
| ENSMUSG00000023031 | Cela1      | 0.001524639 | 2.11055721  |
| ENSMUSG00000053469 | Tg         | 9.26E-13    | 2.108048332 |
| ENSMUSG00000055415 | Atp10b     | 1.22E-05    | 2.102834053 |
| ENSMUSG00000063975 | Slco1a5    | 0.007578902 | 2.08925432  |
| ENSMUSG00000010830 | Kdelr3     | 0.000529815 | 2.06581796  |
| ENSMUSG00000024529 | Lox        | 1.40E-25    | 2.051809035 |

|                    |          |             |             |
|--------------------|----------|-------------|-------------|
| ENSMUSG00000025584 | Pde8a    | 2.05E-05    | 2.013226667 |
| ENSMUSG00000051279 | Gdf6     | 3.12E-17    | 2.004611936 |
| ENSMUSG00000022296 | Baalc    | 0.000853471 | 1.978877361 |
| ENSMUSG00000107249 | Baalc    | 0.000853471 | 1.978877361 |
| ENSMUSG00000022661 | Cd200    | 2.40E-35    | 1.971375027 |
| ENSMUSG00000019970 | Sgk1     | 4.49E-07    | 1.964068234 |
| ENSMUSG00000029121 | Crmp1    | 1.63E-12    | 1.954822461 |
| ENSMUSG00000106268 | Gm18492  | 0.014163925 | 1.947097555 |
| ENSMUSG00000042109 | Csdc2    | 3.50E-16    | 1.943576638 |
| ENSMUSG00000011256 | Adam19   | 4.95E-13    | 1.937272098 |
| ENSMUSG00000021994 | Wnt5a    | 1.93E-18    | 1.923999255 |
| ENSMUSG00000057074 | Ces1g    | 2.08E-09    | 1.923038278 |
| ENSMUSG00000005124 | Wisp1    | 9.65E-08    | 1.905065427 |
| ENSMUSG00000034981 | Parm1    | 3.55E-17    | 1.903493096 |
| ENSMUSG00000020905 | Usp43    | 2.32E-07    | 1.887471184 |
| ENSMUSG00000019997 | Ctgf     | 1.31E-05    | 1.886427851 |
| ENSMUSG00000109801 | Olf1316  | 0.003005741 | 1.879790477 |
| ENSMUSG00000067158 | Col4a4   | 1.30E-54    | 1.870259176 |
| ENSMUSG00000053199 | Arhgap20 | 0.029698266 | 1.866352044 |
| ENSMUSG00000032908 | Sgpp2    | 4.18E-06    | 1.862608236 |
| ENSMUSG00000037341 | Slc9a7   | 4.03E-08    | 1.858054221 |
| ENSMUSG00000043079 | Synpo    | 2.82E-56    | 1.852475382 |
| ENSMUSG00000072214 | O5-Sep   | 8.55E-18    | 1.813538717 |
| ENSMUSG00000026764 | Kif5c    | 1.04E-09    | 1.813444444 |
| ENSMUSG00000032315 | Cyp1a1   | 1.95E-22    | 1.803721424 |
| ENSMUSG00000058248 | Kcnh1    | 3.63E-11    | 1.800545283 |
| ENSMUSG00000055044 | Pdlim1   | 1.36E-11    | 1.799082008 |
| ENSMUSG00000042115 | Klhdc8a  | 3.42E-17    | 1.783831276 |
| ENSMUSG00000051998 | Lax1     | 3.66E-09    | 1.778970733 |
| ENSMUSG00000026420 | Il24     | 0.003638435 | 1.768338568 |
| ENSMUSG00000035390 | Brsk1    | 0.00176985  | 1.766548932 |
| ENSMUSG00000037224 | Zfyve28  | 1.55E-05    | 1.76116249  |
| ENSMUSG00000017817 | Jph2     | 0.000639545 | 1.754263624 |
| ENSMUSG00000027995 | Tlr2     | 6.03E-09    | 1.750267363 |
| ENSMUSG00000022494 | Shisa9   | 0.000505946 | 1.74668479  |
| ENSMUSG00000042793 | Lgr6     | 0.000438981 | 1.745034081 |
| ENSMUSG00000037493 | Cib2     | 0.000127555 | 1.742585685 |
| ENSMUSG00000096847 | Tmem151b | 2.90E-07    | 1.731475897 |
| ENSMUSG00000047293 | Gpr15    | 0.002838797 | 1.727492374 |
| ENSMUSG00000031827 | Cotl1    | 0.000456974 | 1.720436048 |
| ENSMUSG00000046997 | Spsb4    | 7.74E-28    | 1.708343554 |
| ENSMUSG00000005087 | Cd44     | 0.004018833 | 1.70779647  |
| ENSMUSG00000020032 | Nuak1    | 8.43E-39    | 1.706580101 |
| ENSMUSG00000079355 | Ackr4    | 1.37E-07    | 1.705564835 |
| ENSMUSG00000043760 | Pkhd1    | 0.011624945 | 1.705538768 |
| ENSMUSG00000032135 | Mcam     | 1.01E-13    | 1.704645779 |
| ENSMUSG00000047139 | Cd24a    | 0.001907413 | 1.702769909 |

|                    |            |             |             |
|--------------------|------------|-------------|-------------|
| ENSMUSG00000003545 | Fosb       | 0.010379736 | 1.698671397 |
| ENSMUSG00000020154 | Ptprb      | 1.07E-15    | 1.697498298 |
| ENSMUSG00000079465 | Col4a3     | 6.51E-46    | 1.692622163 |
| ENSMUSG00000061615 | Hist1h2ab  | 0.046123816 | 1.690354895 |
| ENSMUSG00000042425 | Frmpd3     | 0.002786981 | 1.683164895 |
| ENSMUSG00000031740 | Mmp2       | 5.98E-20    | 1.675110827 |
| ENSMUSG00000029093 | Sorcs2     | 0.016221163 | 1.673906066 |
| ENSMUSG00000027864 | Ptgfrn     | 2.08E-09    | 1.665345492 |
| ENSMUSG00000027834 | Serpini1   | 0.000487974 | 1.661332054 |
| ENSMUSG00000027276 | Jag1       | 0.00018582  | 1.660650209 |
| ENSMUSG00000032717 | Mdfi       | 1.41E-24    | 1.658068094 |
| ENSMUSG00000033174 | Mgll       | 5.59E-77    | 1.654959405 |
| ENSMUSG00000033177 | Tmprss7    | 0.019583178 | 1.650087136 |
| ENSMUSG00000042106 | Fam212a    | 0.011945684 | 1.647678024 |
| ENSMUSG00000031871 | Cdh5       | 0.011975811 | 1.640653205 |
| ENSMUSG00000028031 | Dkk2       | 3.05E-33    | 1.625614865 |
| ENSMUSG00000027322 | Siglec1    | 1.68E-05    | 1.621777033 |
| ENSMUSG00000068748 | Ptprz1     | 0.003576193 | 1.616664029 |
| ENSMUSG00000017737 | Mmp9       | 0.014866155 | 1.61182448  |
| ENSMUSG00000042821 | Snai1      | 1.18E-06    | 1.603297517 |
| ENSMUSG00000047496 | Rnf152     | 0.001619304 | 1.599184253 |
| ENSMUSG00000114473 | AC116797.1 | 0.004575998 | 1.596921786 |
| ENSMUSG00000020669 | Sh3yl1     | 4.04E-05    | 1.594571266 |
| ENSMUSG00000024501 | Dpysl3     | 1.18E-17    | 1.59189218  |
| ENSMUSG00000030717 | Nupr1      | 2.31E-64    | 1.590969407 |
| ENSMUSG00000024451 | Arap3      | 0.000191378 | 1.587548217 |
| ENSMUSG00000044243 | Bhlha9     | 3.15E-06    | 1.573108967 |
| ENSMUSG00000037482 | Erv3       | 1.42E-11    | 1.55581515  |
| ENSMUSG00000067377 | Tspan6     | 9.39E-44    | 1.552863186 |
| ENSMUSG00000001270 | Ckb        | 0.000997486 | 1.551057841 |
| ENSMUSG00000035104 | Eva1a      | 0.000621795 | 1.550549292 |
| ENSMUSG00000032014 | Oaf        | 0.02162331  | 1.549845645 |
| ENSMUSG00000078984 | Gm11027    | 5.10E-18    | 1.547357887 |
| ENSMUSG00000071537 | Klrg2      | 4.42E-71    | 1.543935135 |
| ENSMUSG00000001870 | Ltbp1      | 3.64E-07    | 1.543888143 |
| ENSMUSG00000060568 | Fam78b     | 3.97E-05    | 1.540021356 |
| ENSMUSG00000037217 | Syn1       | 0.000374582 | 1.539343967 |
| ENSMUSG00000001349 | Cnn1       | 0.001945281 | 1.534301898 |
| ENSMUSG00000061576 | Dpp6       | 3.52E-26    | 1.529268003 |
| ENSMUSG00000041836 | Ptpre      | 3.07E-07    | 1.525920707 |
| ENSMUSG00000031837 | Necab2     | 0.012603674 | 1.524107618 |
| ENSMUSG00000036617 | Etl4       | 5.68E-11    | 1.517152947 |
| ENSMUSG00000032487 | Ptgs2      | 1.28E-10    | 1.515927413 |
| ENSMUSG00000028348 | Cavin4     | 5.66E-06    | 1.514895807 |
| ENSMUSG00000008318 | Relt       | 0.004396362 | 1.513723226 |
| ENSMUSG00000027858 | Tspan2     | 0.037388695 | 1.508143631 |
| ENSMUSG00000019850 | Tnfai3     | 0.006823205 | 1.493242569 |

|                    |          |             |             |
|--------------------|----------|-------------|-------------|
| ENSMUSG00000031880 | Rrad     | 0.015544247 | 1.487229747 |
| ENSMUSG00000020598 | Nrcam    | 0.003584406 | 1.487071698 |
| ENSMUSG00000028931 | Kcnab2   | 0.003913256 | 1.475606381 |
| ENSMUSG00000026837 | Col5a1   | 8.60E-13    | 1.464265828 |
| ENSMUSG00000028784 | Spocd1   | 0.039616587 | 1.459424164 |
| ENSMUSG00000038602 | Slc35f1  | 1.44E-11    | 1.455718358 |
| ENSMUSG00000063564 | Col23a1  | 0.044579942 | 1.454140237 |
| ENSMUSG00000038011 | Dnah10   | 0.004631928 | 1.451050848 |
| ENSMUSG00000031785 | Adgrg1   | 3.92E-42    | 1.448433158 |
| ENSMUSG00000025790 | Slco3a1  | 1.79E-36    | 1.441532229 |
| ENSMUSG00000020646 | Mboat2   | 3.20E-06    | 1.44092282  |
| ENSMUSG00000028037 | Ifi44    | 0.043481198 | 1.438435673 |
| ENSMUSG00000021768 | Dusp13   | 2.81E-14    | 1.43705558  |
| ENSMUSG00000078144 | Capns2   | 0.02270551  | 1.424713616 |
| ENSMUSG00000060487 | Samd5    | 0.000570228 | 1.420596961 |
| ENSMUSG00000020340 | Cyfip2   | 0.016735875 | 1.417702604 |
| ENSMUSG00000018819 | Lsp1     | 2.60E-51    | 1.412277822 |
| ENSMUSG00000058914 | C1qtnf3  | 0.00104201  | 1.407018547 |
| ENSMUSG00000054976 | Nyap2    | 0.012045282 | 1.405001201 |
| ENSMUSG00000026414 | Tnnt2    | 0.000917124 | 1.40295677  |
| ENSMUSG00000074874 | Ctla2b   | 1.53E-06    | 1.399866628 |
| ENSMUSG00000024679 | Ms4a6d   | 8.36E-32    | 1.394881584 |
| ENSMUSG00000024736 | Tmem132a | 1.13E-148   | 1.390532465 |
| ENSMUSG00000010051 | Hyal1    | 6.61E-22    | 1.381691846 |
| ENSMUSG00000024300 | Myo1f    | 0.01352785  | 1.37618979  |
| ENSMUSG00000040734 | Ppp1r13l | 6.10E-09    | 1.375157938 |
| ENSMUSG00000032128 | Robo3    | 8.44E-08    | 1.372786525 |
| ENSMUSG00000030116 | Mfap5    | 6.66E-05    | 1.365729272 |
| ENSMUSG00000034220 | Gpc1     | 7.27E-14    | 1.363669103 |
| ENSMUSG00000021675 | F2rl2    | 0.026040675 | 1.355018717 |
| ENSMUSG00000029695 | Aass     | 0.028246304 | 1.354388415 |
| ENSMUSG00000028480 | Glipr2   | 1.21E-10    | 1.350104853 |
| ENSMUSG00000039323 | Igfbp2   | 0.002567301 | 1.349414435 |
| ENSMUSG00000048096 | Lmod1    | 3.90E-05    | 1.341406372 |
| ENSMUSG00000060716 | Plekhh1  | 6.55E-08    | 1.34106597  |
| ENSMUSG00000031673 | Cdh11    | 1.48E-12    | 1.34067721  |
| ENSMUSG00000020846 | Rflnb    | 3.90E-05    | 1.333481109 |
| ENSMUSG00000055493 | Epm2a    | 0.005122451 | 1.330916981 |
| ENSMUSG00000005355 | Casp14   | 1.97E-05    | 1.329576688 |
| ENSMUSG00000055994 | Nod2     | 0.009092665 | 1.328620329 |
| ENSMUSG00000070858 | Gm1673   | 1.93E-05    | 1.326335893 |
| ENSMUSG00000019539 | Rcn3     | 5.30E-27    | 1.32391433  |
| ENSMUSG00000021701 | Plk2     | 0.000796406 | 1.321698155 |
| ENSMUSG00000033767 | Tmem131l | 7.06E-77    | 1.321451153 |
| ENSMUSG00000021187 | Tc2n     | 0.00204847  | 1.320610038 |
| ENSMUSG00000059498 | Fcgr3    | 6.04E-06    | 1.319697881 |
| ENSMUSG00000020186 | Csrp2    | 5.79E-11    | 1.319103892 |

|                    |               |             |             |
|--------------------|---------------|-------------|-------------|
| ENSMUSG00000020902 | Ntn1          | 4.36E-07    | 1.311927562 |
| ENSMUSG00000038264 | Sema7a        | 2.54E-06    | 1.308819438 |
| ENSMUSG00000061751 | Kalrn         | 4.88E-14    | 1.308263524 |
| ENSMUSG00000048782 | Insc          | 0.032901831 | 1.30800178  |
| ENSMUSG00000063632 | Sox11         | 3.40E-06    | 1.307851945 |
| ENSMUSG00000073460 | PnlDC1        | 0.00297622  | 1.30719101  |
| ENSMUSG00000045498 | Pcdhb3        | 0.015073775 | 1.300133653 |
| ENSMUSG00000056758 | Hmga2         | 4.14E-07    | 1.293076591 |
| ENSMUSG00000031561 | Tenm3         | 3.03E-26    | 1.286838986 |
| ENSMUSG00000074480 | Mex3a         | 3.86E-109   | 1.286371186 |
| ENSMUSG00000083282 | Ctsf          | 2.31E-11    | 1.284192998 |
| ENSMUSG00000028287 | 1700009N14Rik | 0.001521568 | 1.284043039 |
| ENSMUSG00000072934 | Trpc5os       | 0.025958687 | 1.277037658 |
| ENSMUSG00000028444 | Cntfr         | 0.005990674 | 1.276335945 |
| ENSMUSG00000050671 | Ism2          | 0.016113206 | 1.274773694 |
| ENSMUSG00000006219 | Fblim1        | 2.99E-22    | 1.274279127 |
| ENSMUSG00000034687 | Fras1         | 0.028453978 | 1.274142034 |
| ENSMUSG00000031647 | Mfap3l        | 5.67E-09    | 1.27404923  |
| ENSMUSG00000052776 | Oas1a         | 0.000260027 | 1.272446335 |
| ENSMUSG00000064080 | Fbln2         | 0.00233883  | 1.270844189 |
| ENSMUSG00000020674 | Pxdn          | 1.95E-112   | 1.267461323 |
| ENSMUSG00000039542 | Ncam1         | 1.76E-20    | 1.266997327 |
| ENSMUSG00000022105 | Rb1           | 1.06E-11    | 1.262067778 |
| ENSMUSG00000046807 | Lrrc75b       | 1.02E-60    | 1.261792505 |
| ENSMUSG00000046743 | Fat4          | 1.58E-05    | 1.260083164 |
| ENSMUSG00000006800 | Sulf2         | 3.14E-33    | 1.256586406 |
| ENSMUSG00000054934 | Kcnmb4        | 7.02E-27    | 1.254108393 |
| ENSMUSG00000021365 | Nedd9         | 1.62E-19    | 1.253794946 |
| ENSMUSG00000030032 | Wdr54         | 5.72E-07    | 1.251297731 |
| ENSMUSG00000074794 | Arrdc3        | 1.99E-13    | 1.24864953  |
| ENSMUSG00000028347 | Tmeff1        | 4.25E-09    | 1.247536017 |
| ENSMUSG00000048960 | Prex2         | 2.36E-05    | 1.246897809 |
| ENSMUSG00000027412 | Lpin3         | 0.028246304 | 1.24669483  |
| ENSMUSG00000056367 | Actr3b        | 1.49E-09    | 1.238870324 |
| ENSMUSG00000042213 | Zfand4        | 0.00025104  | 1.230300407 |
| ENSMUSG00000038415 | Foxq1         | 0.006564903 | 1.227546567 |
| ENSMUSG00000039361 | Picalm        | 1.45E-05    | 1.226149413 |
| ENSMUSG00000052331 | Ankrd44       | 7.72E-98    | 1.22248837  |
| ENSMUSG00000038400 | Pmepa1        | 1.26E-13    | 1.222162182 |
| ENSMUSG00000029669 | Tspan12       | 1.42E-05    | 1.221591592 |
| ENSMUSG00000078776 | 9530053A07Rik | 0.005408569 | 1.216362713 |
| ENSMUSG00000045312 | Lhfpl2        | 3.18E-07    | 1.215333236 |
| ENSMUSG00000032849 | Abcc4         | 1.11E-44    | 1.215296296 |
| ENSMUSG00000089791 | Gm3555        | 7.95E-09    | 1.214545574 |
| ENSMUSG00000012705 | Retn          | 7.31E-07    | 1.214126066 |
| ENSMUSG00000040152 | Thbs1         | 2.69E-13    | 1.214023421 |
| ENSMUSG00000066842 | Hmgn1         | 1.14E-10    | 1.212772437 |

|                     |          |             |             |
|---------------------|----------|-------------|-------------|
| ENSMUSG00000029337  | Fgf5     | 1.08E-06    | 1.212766108 |
| ENSMUSG00000019843  | Fyn      | 2.03E-08    | 1.207575798 |
| ENSMUSG00000036067  | Slc2a6   | 0.049081204 | 1.206010054 |
| ENSMUSG00000037012  | Hk1      | 2.56E-18    | 1.198439797 |
| ENSMUSG00000025207  | Sema4g   | 2.92E-10    | 1.198011917 |
| ENSMUSG00000021186  | Fbln5    | 2.24E-97    | 1.197948786 |
| ENSMUSG00000042097  | Zfp239   | 5.35E-06    | 1.1972761   |
| ENSMUSG00000028664  | Ephb2    | 0.005275268 | 1.19715666  |
| ENSMUSG00000031169  | Porcn    | 9.83E-06    | 1.190730169 |
| ENSMUSG00000000782  | Tcf7     | 4.18E-10    | 1.188629807 |
| ENSMUSG00000026826  | Nr4a2    | 0.000824558 | 1.175113327 |
| ENSMUSG00000026817  | Ak1      | 0.000240065 | 1.174882649 |
| ENSMUSG00000044807  | Zfp354c  | 1.91E-08    | 1.173563485 |
| ENSMUSG00000027470  | Mylk2    | 1.75E-05    | 1.167902353 |
| ENSMUSG00000046550  | Spin2c   | 0.019693693 | 1.167808048 |
| ENSMUSG00000021130  | Galnt16  | 0.010688673 | 1.167254368 |
| ENSMUSG00000022636  | Alcam    | 2.38E-41    | 1.167037766 |
| ENSMUSG00000020407  | Upp1     | 0.024251793 | 1.165362174 |
| ENSMUSG00000030730  | Atp2a1   | 0.000351883 | 1.163075338 |
| ENSMUSG00000026548  | Slamf9   | 0.00018016  | 1.160791535 |
| ENSMUSG00000000126  | Wnt9a    | 1.57E-11    | 1.158147861 |
| ENSMUSG00000024299  | Adamts10 | 2.63E-32    | 1.158045767 |
| ENSMUSG000000091636 | Akain1   | 0.001475381 | 1.154692658 |
| ENSMUSG00000024397  | Aif1     | 0.016580273 | 1.145671664 |
| ENSMUSG00000034227  | Foxj1    | 1.04E-05    | 1.145373444 |
| ENSMUSG00000025494  | Sigirr   | 0.028338318 | 1.143891837 |
| ENSMUSG00000040430  | Pitpnc1  | 0.00476158  | 1.138332084 |
| ENSMUSG00000005057  | Sh2b2    | 1.76E-10    | 1.134580645 |
| ENSMUSG00000043557  | Mdga1    | 3.30E-05    | 1.134127243 |
| ENSMUSG000000051375 | Pcdh1    | 1.67E-05    | 1.132789339 |
| ENSMUSG00000030393  | Zik1     | 1.60E-19    | 1.128255533 |
| ENSMUSG00000034330  | Plcg2    | 4.55E-23    | 1.126524355 |
| ENSMUSG000000051379 | Flrt3    | 0.00018174  | 1.126389571 |
| ENSMUSG000000050394 | Armxc6   | 4.09E-23    | 1.120065963 |
| ENSMUSG00000030659  | Nucb2    | 1.04E-17    | 1.113893098 |
| ENSMUSG00000025931  | Paqr8    | 6.64E-11    | 1.111117408 |
| ENSMUSG00000040046  | Tph1     | 0.034961043 | 1.110156824 |
| ENSMUSG000000055322 | Tns1     | 6.47E-13    | 1.108221468 |
| ENSMUSG00000018470  | Kcnab3   | 0.002210012 | 1.107291132 |
| ENSMUSG00000048534  | Jaml     | 0.000427658 | 1.10509862  |
| ENSMUSG00000030107  | Usp18    | 0.009380512 | 1.10441554  |
| ENSMUSG00000001630  | Stk38l   | 1.81E-30    | 1.1028399   |
| ENSMUSG00000016194  | Hsd11b1  | 9.96E-06    | 1.102406214 |
| ENSMUSG00000032511  | Scn5a    | 0.028217859 | 1.093325842 |
| ENSMUSG00000032589  | Bsn      | 0.016862299 | 1.090319037 |
| ENSMUSG00000111738  | Gm18329  | 0.002703896 | 1.090080766 |
| ENSMUSG00000039936  | Pik3cd   | 0.036113435 | 1.087108976 |

|                    |               |             |             |
|--------------------|---------------|-------------|-------------|
| ENSMUSG00000048895 | Cdk5r1        | 0.022384222 | 1.080857593 |
| ENSMUSG00000052396 | Mogat2        | 1.63E-07    | 1.080441894 |
| ENSMUSG00000039470 | Zdhhc2        | 8.85E-17    | 1.07944458  |
| ENSMUSG00000051599 | Pcdhb2        | 0.001097344 | 1.079232848 |
| ENSMUSG00000022519 | Srl           | 0.012886619 | 1.076053221 |
| ENSMUSG00000038648 | Creb3l2       | 9.57E-16    | 1.075230163 |
| ENSMUSG00000064294 | Aox3          | 0.007822352 | 1.074326821 |
| ENSMUSG00000023781 | Hes7          | 0.003190756 | 1.07404212  |
| ENSMUSG00000022952 | Runx1         | 0.045678251 | 1.073922103 |
| ENSMUSG00000024544 | Ldlrad4       | 2.31E-28    | 1.073013196 |
| ENSMUSG00000036155 | Mgat5         | 2.04E-34    | 1.072213689 |
| ENSMUSG00000048216 | Gpr85         | 0.003035187 | 1.067773432 |
| ENSMUSG00000048058 | Ldlrad3       | 5.84E-06    | 1.065795878 |
| ENSMUSG00000032300 | 1700017B05Rik | 1.85E-30    | 1.061865116 |
| ENSMUSG00000035109 | Shc4          | 2.09E-10    | 1.053740811 |
| ENSMUSG00000062184 | Hs6st2        | 1.15E-25    | 1.052104455 |
| ENSMUSG00000031709 | Tbc1d9        | 0.012065325 | 1.04631009  |
| ENSMUSG00000010311 | Optc          | 0.0123262   | 1.044203717 |
| ENSMUSG00000070576 | Mn1           | 0.047238961 | 1.042715713 |
| ENSMUSG00000053192 | Ml1t11        | 2.35E-07    | 1.03846198  |
| ENSMUSG00000000530 | Acvrl1        | 6.27E-05    | 1.035107382 |
| ENSMUSG00000037649 | H2-DMa        | 6.93E-05    | 1.033783941 |
| ENSMUSG00000029270 | Fam69a        | 5.35E-42    | 1.032786428 |
| ENSMUSG00000022098 | Bmp1          | 1.23E-28    | 1.031675979 |
| ENSMUSG00000020689 | Itgb3         | 0.003734182 | 1.030636193 |
| ENSMUSG00000115797 | AC122320.1    | 0.013384109 | 1.030398529 |
| ENSMUSG00000050345 | 4930486L24Rik | 8.89E-12    | 1.026670073 |
| ENSMUSG00000061731 | Ext1          | 1.13E-14    | 1.026547277 |
| ENSMUSG00000070526 | Peg12         | 0.000179844 | 1.026522572 |
| ENSMUSG00000026235 | Epha4         | 6.94E-16    | 1.01974623  |
| ENSMUSG00000024486 | Hbegf         | 0.003701422 | 1.01931551  |
| ENSMUSG00000025856 | Pdgfa         | 0.003336857 | 1.018089386 |
| ENSMUSG00000053395 | Cacng8        | 0.001758969 | 1.017868051 |
| ENSMUSG00000106728 | Cacng8        | 0.001758969 | 1.017868051 |
| ENSMUSG00000042662 | Dusp15        | 0.04691763  | 1.015350344 |
| ENSMUSG00000009687 | Fxyd5         | 0.001541921 | 1.015039705 |
| ENSMUSG00000048992 | Prss32        | 0.041857253 | 1.014873021 |
| ENSMUSG00000031595 | Pdgfrl        | 3.21E-05    | 1.012297698 |
| ENSMUSG00000056427 | Slit3         | 6.24E-54    | 1.012097247 |
| ENSMUSG00000028780 | Sema3c        | 4.77E-75    | 1.011613197 |
| ENSMUSG00000033152 | Podxl2        | 3.02E-15    | 1.011561196 |
| ENSMUSG00000060063 | Alox5ap       | 5.59E-05    | 1.008524774 |
| ENSMUSG00000039405 | Prss23        | 4.18E-11    | 1.007685611 |
| ENSMUSG00000045216 | Hs6st1        | 7.71E-64    | 1.006781166 |
| ENSMUSG00000000753 | Serpinf1      | 7.74E-11    | 1.006159783 |
| ENSMUSG00000031523 | Dlc1          | 9.02E-05    | 0.999909292 |
| ENSMUSG00000028194 | Ddah1         | 2.86E-07    | 0.999261532 |



|                    |               |             |             |
|--------------------|---------------|-------------|-------------|
| ENSMUSG00000028039 | Efna3         | 2.20E-06    | 0.998154274 |
| ENSMUSG00000053687 | Dpep2         | 1.89E-05    | 0.99769898  |
| ENSMUSG00000073680 | Tmem88b       | 0.002476939 | 0.997578998 |
| ENSMUSG00000005267 | Zfp287        | 1.01E-06    | 0.996222228 |
| ENSMUSG00000022816 | Fstl1         | 5.43E-72    | 0.995643854 |
| ENSMUSG00000027848 | Olfml3        | 0.000828405 | 0.991031158 |
| ENSMUSG00000074280 | Gm6166        | 5.10E-46    | 0.990627789 |
| ENSMUSG00000000317 | Bcl6b         | 0.00619425  | 0.987123438 |
| ENSMUSG00000021643 | Serf1         | 1.41E-20    | 0.983854705 |
| ENSMUSG00000052160 | Pld4          | 0.011615243 | 0.983354291 |
| ENSMUSG00000116258 | AC124353.2    | 0.011615243 | 0.983354291 |
| ENSMUSG00000043388 | Tmem130       | 1.74E-05    | 0.982973963 |
| ENSMUSG00000026494 | Kif26b        | 3.06E-58    | 0.98279611  |
| ENSMUSG00000042116 | Vwa1          | 0.019698956 | 0.980118171 |
| ENSMUSG00000063687 | Pcdhb5        | 1.20E-08    | 0.977704629 |
| ENSMUSG00000040254 | Sema3d        | 5.14E-61    | 0.975710627 |
| ENSMUSG00000047945 | Marcksl1      | 6.73E-36    | 0.974530428 |
| ENSMUSG00000049092 | Gpr137c       | 0.014799119 | 0.972168703 |
| ENSMUSG00000027533 | Fabp5         | 3.50E-32    | 0.97185528  |
| ENSMUSG00000079442 | St6galnac4    | 3.18E-08    | 0.96688384  |
| ENSMUSG00000043498 | 9330132A10Rik | 3.37E-17    | 0.965180909 |
| ENSMUSG00000071636 | Rimbp3        | 0.022823194 | 0.9630877   |
| ENSMUSG00000042978 | Sbk1          | 5.13E-13    | 0.961817567 |
| ENSMUSG00000038587 | Akap12        | 1.31E-07    | 0.961237931 |
| ENSMUSG00000029868 | Trpv6         | 0.000756719 | 0.960286312 |
| ENSMUSG00000031340 | Gabre         | 0.024381549 | 0.956564599 |
| ENSMUSG00000044576 | Garem2        | 0.022717397 | 0.955492892 |
| ENSMUSG00000048537 | Phldb1        | 1.46E-11    | 0.952966328 |
| ENSMUSG00000035105 | Egln3         | 0.00219946  | 0.951717859 |
| ENSMUSG00000005958 | Ephb3         | 4.81E-40    | 0.951074204 |
| ENSMUSG0000003863  | Ppfia3        | 4.02E-06    | 0.95048397  |
| ENSMUSG00000073514 | Dok6          | 3.08E-11    | 0.947111242 |
| ENSMUSG00000031530 | Dusp4         | 0.006207545 | 0.946607058 |
| ENSMUSG00000041895 | Wipi1         | 1.24E-08    | 0.945885375 |
| ENSMUSG00000029648 | Flt1          | 0.004371187 | 0.942731293 |
| ENSMUSG00000022346 | Myc           | 0.036383475 | 0.939091723 |
| ENSMUSG00000027827 | Kcnab1        | 7.25E-58    | 0.938044968 |
| ENSMUSG00000037624 | Kcnk2         | 1.26E-05    | 0.937356083 |
| ENSMUSG00000040836 | Gpr161        | 1.13E-14    | 0.936438739 |
| ENSMUSG00000037211 | Spry1         | 7.10E-05    | 0.933887612 |
| ENSMUSG00000020866 | Cacna1g       | 0.000570242 | 0.93325896  |
| ENSMUSG00000030796 | Tead2         | 3.26E-25    | 0.932593497 |
| ENSMUSG00000030207 | Fam234b       | 4.76E-22    | 0.930810787 |
| ENSMUSG00000050530 | Fam171a1      | 3.47E-16    | 0.930289442 |
| ENSMUSG00000017697 | Ada           | 2.64E-08    | 0.930093129 |
| ENSMUSG00000038807 | Rap1gap2      | 0.000520218 | 0.929911436 |
| ENSMUSG00000097449 | Prkcg         | 0.033582452 | 0.925661591 |

|                    |            |             |             |
|--------------------|------------|-------------|-------------|
| ENSMUSG00000062661 | Ncs1       | 2.83E-19    | 0.92467125  |
| ENSMUSG00000061436 | Hipk2      | 2.36E-33    | 0.92169385  |
| ENSMUSG00000038295 | Atg9b      | 0.00679886  | 0.919142204 |
| ENSMUSG00000000957 | Mmp14      | 1.98E-25    | 0.918692098 |
| ENSMUSG00000070524 | Fcrlb      | 3.78E-19    | 0.915047108 |
| ENSMUSG00000022817 | Itgb5      | 1.99E-27    | 0.911395248 |
| ENSMUSG00000046169 | Adamts6    | 0.005790349 | 0.911199578 |
| ENSMUSG00000029174 | Tbc1d1     | 7.42E-07    | 0.910392997 |
| ENSMUSG00000055761 | Nkain3     | 1.62E-10    | 0.910015267 |
| ENSMUSG00000053930 | Shisa6     | 8.43E-19    | 0.90946356  |
| ENSMUSG00000045136 | Tubb2b     | 7.46E-10    | 0.90676554  |
| ENSMUSG00000024803 | Ankrd1     | 0.000360645 | 0.903326336 |
| ENSMUSG00000044362 | Ccdc89     | 0.001664274 | 0.900247831 |
| ENSMUSG00000000489 | Pdgfb      | 6.46E-07    | 0.900175747 |
| ENSMUSG00000028445 | Enho       | 2.50E-05    | 0.899892008 |
| ENSMUSG00000022844 | Pdia5      | 2.10E-18    | 0.896073921 |
| ENSMUSG00000032796 | Lama1      | 2.68E-52    | 0.89029562  |
| ENSMUSG00000114635 | CT010498.2 | 0.043316914 | 0.88731583  |
| ENSMUSG00000069094 | Pde7a      | 0.004661296 | 0.881809181 |
| ENSMUSG00000045545 | Krt14      | 0.017350017 | 0.878512853 |
| ENSMUSG00000057706 | Mex3b      | 3.53E-16    | 0.878161195 |
| ENSMUSG00000033192 | Lpcat2     | 1.34E-28    | 0.875279431 |
| ENSMUSG00000038508 | Gdf15      | 9.00E-09    | 0.867148439 |
| ENSMUSG00000038623 | Tm6sf1     | 0.005344465 | 0.863891841 |
| ENSMUSG00000062646 | Ganc       | 3.32E-06    | 0.861736964 |
| ENSMUSG00000023830 | Igf2r      | 0.001267259 | 0.86130633  |
| ENSMUSG00000004562 | Arhgef40   | 1.34E-06    | 0.860325061 |
| ENSMUSG00000068923 | Syt11      | 1.51E-12    | 0.857221937 |
| ENSMUSG00000029163 | Emilin1    | 0.025439323 | 0.856737267 |
| ENSMUSG00000031990 | Jam3       | 1.02E-07    | 0.855988374 |
| ENSMUSG00000074676 | Foxs1      | 1.22E-15    | 0.8554347   |
| ENSMUSG00000021066 | Atl1       | 0.00015339  | 0.852734469 |
| ENSMUSG00000051515 | Fam181b    | 5.79E-08    | 0.852445906 |
| ENSMUSG00000113473 | Gm7045     | 0.046071897 | 0.849694522 |
| ENSMUSG00000040118 | Cacna2d1   | 7.23E-09    | 0.849456013 |
| ENSMUSG00000026208 | Des        | 0.025804064 | 0.846339104 |
| ENSMUSG00000032724 | Abtb2      | 1.21E-11    | 0.845634181 |
| ENSMUSG00000037031 | Tspan15    | 0.002336253 | 0.842161445 |
| ENSMUSG00000030562 | Nox4       | 0.001803278 | 0.837873217 |
| ENSMUSG00000030170 | Wnt5b      | 0.00025059  | 0.837270406 |
| ENSMUSG00000111063 | Zkscan7    | 0.004319886 | 0.837211705 |
| ENSMUSG00000039089 | L3mbtl3    | 2.30E-11    | 0.836568869 |
| ENSMUSG00000030089 | Slc41a3    | 5.13E-13    | 0.836521837 |
| ENSMUSG00000012819 | Cdh23      | 0.01241772  | 0.83623838  |
| ENSMUSG0000001435  | Col18a1    | 0.002123029 | 0.835509491 |
| ENSMUSG00000019146 | Cacng2     | 0.02980561  | 0.833470875 |
| ENSMUSG00000037419 | Endod1     | 0.002073257 | 0.83240472  |

|                    |          |             |             |
|--------------------|----------|-------------|-------------|
| ENSMUSG00000035547 | Capn5    | 0.004132196 | 0.827237148 |
| ENSMUSG00000062488 | Ifit3b   | 0.016624664 | 0.826968956 |
| ENSMUSG00000029860 | Zyx      | 0.001099378 | 0.826335284 |
| ENSMUSG00000050271 | Prag1    | 0.009022717 | 0.825898406 |
| ENSMUSG0000007594  | Hapln4   | 7.10E-05    | 0.824207312 |
| ENSMUSG00000027298 | Tyro3    | 3.34E-05    | 0.823810602 |
| ENSMUSG00000050855 | Zfp940   | 0.000258778 | 0.823245939 |
| ENSMUSG00000031972 | Acta1    | 0.034299291 | 0.822122399 |
| ENSMUSG00000019817 | Plagl1   | 2.49E-12    | 0.819783663 |
| ENSMUSG00000028789 | Azin2    | 1.94E-05    | 0.819310011 |
| ENSMUSG00000037428 | Vgf      | 0.028018126 | 0.81779626  |
| ENSMUSG00000024052 | Lpin2    | 1.08E-12    | 0.817263705 |
| ENSMUSG00000053846 | Lipg     | 0.001617841 | 0.816757834 |
| ENSMUSG00000026042 | Col5a2   | 2.09E-42    | 0.81451016  |
| ENSMUSG00000035456 | Prdm8    | 1.56E-05    | 0.813372442 |
| ENSMUSG00000024940 | Ltbp3    | 1.40E-32    | 0.812861414 |
| ENSMUSG00000033233 | Trim45   | 5.90E-08    | 0.812665236 |
| ENSMUSG00000041774 | Ydjc     | 0.007096006 | 0.809621237 |
| ENSMUSG00000026688 | Mgst3    | 4.41E-05    | 0.808227369 |
| ENSMUSG00000026204 | Ptprn    | 9.00E-09    | 0.807819545 |
| ENSMUSG00000022679 | Mpv17l   | 1.25E-05    | 0.807779433 |
| ENSMUSG00000035107 | Dcbld2   | 2.21E-39    | 0.807405984 |
| ENSMUSG00000022297 | Fzd6     | 7.12E-16    | 0.803054359 |
| ENSMUSG00000107137 | Fzd6     | 7.12E-16    | 0.803054359 |
| ENSMUSG00000020836 | Coro6    | 0.010129755 | 0.800549147 |
| ENSMUSG00000047181 | Samd14   | 5.24E-17    | 0.79802175  |
| ENSMUSG00000046223 | Plaur    | 0.002107779 | 0.796464222 |
| ENSMUSG00000006205 | Htra1    | 1.77E-20    | 0.79516071  |
| ENSMUSG00000039286 | Fndc3b   | 5.59E-08    | 0.794964204 |
| ENSMUSG00000000555 | Itga5    | 6.25E-06    | 0.794009909 |
| ENSMUSG00000050730 | Arhgap42 | 0.010066825 | 0.793849872 |
| ENSMUSG00000020785 | Camkk1   | 0.036262724 | 0.793264361 |
| ENSMUSG00000030084 | Plxna1   | 1.75E-08    | 0.791914253 |
| ENSMUSG00000036564 | Ndrp4    | 1.44E-06    | 0.791071032 |
| ENSMUSG00000026437 | Cdk18    | 0.014054896 | 0.787776839 |
| ENSMUSG00000025140 | Pycr1    | 0.002197567 | 0.786791135 |
| ENSMUSG00000056214 | Pard6g   | 5.44E-10    | 0.785887463 |
| ENSMUSG00000026556 | Vangl2   | 7.94E-09    | 0.785850692 |
| ENSMUSG00000030468 | Siglecg  | 0.034872321 | 0.784623284 |
| ENSMUSG00000057880 | Abat     | 1.60E-16    | 0.783197206 |
| ENSMUSG00000041889 | Shisa4   | 1.25E-28    | 0.782436119 |
| ENSMUSG00000020357 | Flt4     | 0.030146322 | 0.77703592  |
| ENSMUSG00000021573 | Tppp     | 0.000695539 | 0.775876388 |
| ENSMUSG00000032265 | Fam46a   | 0.003174805 | 0.775467914 |
| ENSMUSG00000048482 | Bdnf     | 6.20E-07    | 0.774386855 |
| ENSMUSG00000019960 | Dusp6    | 1.46E-26    | 0.773345714 |
| ENSMUSG00000028919 | Arhgef19 | 0.043118355 | 0.769923886 |

|                    |                |             |             |
|--------------------|----------------|-------------|-------------|
| ENSMUSG00000035835 | Plppr3         | 0.000356167 | 0.76872201  |
| ENSMUSG00000034910 | Pygo1          | 3.51E-06    | 0.768117689 |
| ENSMUSG00000001985 | Grik3          | 0.002291239 | 0.767606892 |
| ENSMUSG00000008090 | Fgfr1          | 3.92E-33    | 0.766576601 |
| ENSMUSG00000069892 | 9930111J21Rik2 | 5.83E-32    | 0.765092537 |
| ENSMUSG00000041773 | Enc1           | 1.11E-05    | 0.764106209 |
| ENSMUSG00000034675 | Dbn1           | 4.81E-40    | 0.762622102 |
| ENSMUSG00000027536 | Chmp4c         | 1.52E-16    | 0.762427594 |
| ENSMUSG00000072235 | Tuba1a         | 1.55E-11    | 0.760874726 |
| ENSMUSG00000031149 | Praf2          | 2.52E-18    | 0.760692752 |
| ENSMUSG00000020601 | Trib2          | 5.07E-07    | 0.760553205 |
| ENSMUSG00000042215 | Bag2           | 4.72E-07    | 0.7601237   |
| ENSMUSG00000079598 | Clec2l         | 0.001124603 | 0.758420356 |
| ENSMUSG00000030657 | Xylt1          | 0.002547192 | 0.756237702 |
| ENSMUSG00000028641 | P3h1           | 7.04E-24    | 0.756171273 |
| ENSMUSG00000024014 | Pim1           | 8.09E-39    | 0.755174523 |
| ENSMUSG00000035914 | Cd276          | 1.23E-19    | 0.753698157 |
| ENSMUSG00000032640 | Chsy1          | 2.31E-14    | 0.753636713 |
| ENSMUSG00000091639 | Gm3756         | 0.003864991 | 0.753509927 |
| ENSMUSG00000042842 | Serpinb6b      | 2.71E-11    | 0.749930457 |
| ENSMUSG00000026435 | Slc45a3        | 5.41E-05    | 0.749887637 |
| ENSMUSG00000058360 | Gm10040        | 0.013083795 | 0.749541676 |
| ENSMUSG00000057963 | Itpk1          | 5.57E-11    | 0.748642883 |
| ENSMUSG00000031480 | Thsd1          | 0.000147613 | 0.748450948 |
| ENSMUSG00000021403 | Serpinb9b      | 9.58E-05    | 0.748145209 |
| ENSMUSG00000004085 | Map3k20        | 1.07E-05    | 0.747459944 |
| ENSMUSG00000057060 | Slc35f3        | 0.026183405 | 0.745914663 |
| ENSMUSG00000035916 | Ptprq          | 1.09E-20    | 0.744324946 |
| ENSMUSG00000022096 | Hr             | 7.77E-09    | 0.744036458 |
| ENSMUSG00000025809 | Itgb1          | 8.16E-26    | 0.742157883 |
| ENSMUSG00000032375 | Aph1b          | 2.68E-06    | 0.741730428 |
| ENSMUSG00000071379 | Hpcal1         | 2.56E-12    | 0.741082176 |
| ENSMUSG00000021260 | Hhip1          | 0.002597612 | 0.738360956 |
| ENSMUSG00000007379 | Dennd2c        | 0.002328092 | 0.737097711 |
| ENSMUSG00000006651 | Aplp1          | 1.32E-16    | 0.736921141 |
| ENSMUSG00000069662 | Marcks         | 7.31E-29    | 0.73660247  |
| ENSMUSG00000030162 | Olr1           | 0.009005357 | 0.733561569 |
| ENSMUSG00000095649 | Gm8979         | 0.039465024 | 0.733252405 |
| ENSMUSG00000026463 | Atp2b4         | 1.37E-05    | 0.731429313 |
| ENSMUSG00000008398 | Elk3           | 1.51E-13    | 0.728943415 |
| ENSMUSG00000028076 | Cd1d1          | 4.75E-06    | 0.728469253 |
| ENSMUSG00000091898 | Tnnc1          | 0.034877332 | 0.727059537 |
| ENSMUSG00000070565 | Rasal2         | 2.10E-10    | 0.727035323 |
| ENSMUSG00000023067 | Cdkn1a         | 1.54E-05    | 0.722354247 |
| ENSMUSG00000054640 | Slc8a1         | 4.23E-10    | 0.721819807 |
| ENSMUSG00000066406 | Akap13         | 3.14E-06    | 0.721034443 |
| ENSMUSG00000020592 | Sdc1           | 4.96E-24    | 0.720951961 |

|                    |               |             |             |
|--------------------|---------------|-------------|-------------|
| ENSMUSG00000007216 | Zfp775        | 0.001412146 | 0.720889992 |
| ENSMUSG00000079334 | Nat6          | 2.82E-11    | 0.720372362 |
| ENSMUSG00000102543 | Pcdhgc5       | 0.035556801 | 0.720106734 |
| ENSMUSG00000042515 | Mum1l1        | 0.000227543 | 0.719703303 |
| ENSMUSG00000028246 | Faxc          | 0.011242802 | 0.719006223 |
| ENSMUSG00000023809 | Rps6ka2       | 4.31E-13    | 0.718800089 |
| ENSMUSG00000022206 | Npr3          | 4.20E-08    | 0.71676373  |
| ENSMUSG00000030401 | Rtn2          | 9.96E-07    | 0.715306204 |
| ENSMUSG00000014837 | 4931428F04Rik | 0.00248344  | 0.715058249 |
| ENSMUSG00000044548 | Dact1         | 0.000255623 | 0.7141502   |
| ENSMUSG00000078716 | Tmem8b        | 0.001100829 | 0.714059047 |
| ENSMUSG00000025068 | Gsto1         | 0.002477976 | 0.713951398 |
| ENSMUSG00000028086 | Fbxw7         | 0.000479621 | 0.711810338 |
| ENSMUSG00000109087 | Gm45105       | 0.044790925 | 0.710614195 |
| ENSMUSG00000060771 | Tsga10        | 0.002511013 | 0.7102545   |
| ENSMUSG00000030096 | Slc6a6        | 1.48E-10    | 0.707657124 |
| ENSMUSG00000030956 | Fam53b        | 3.67E-05    | 0.706858789 |
| ENSMUSG00000070639 | Lrrc8b        | 8.70E-17    | 0.705144769 |
| ENSMUSG00000028793 | Rnf19b        | 8.08E-05    | 0.70468949  |
| ENSMUSG00000037108 | Zcwpw1        | 0.02572778  | 0.703965994 |
| ENSMUSG00000006179 | Prss16        | 0.024069434 | 0.703333445 |
| ENSMUSG00000063605 | Ccdc102a      | 4.27E-05    | 0.70232144  |
| ENSMUSG00000003541 | Ier3          | 1.70E-05    | 0.70193951  |
| ENSMUSG00000023150 | Ivns1abp      | 0.001849401 | 0.701514717 |
| ENSMUSG00000066607 | 6030419C18Rik | 3.41E-36    | 0.700168003 |
| ENSMUSG00000030774 | Pak1          | 8.54E-07    | 0.700116324 |
| ENSMUSG00000044229 | Nxpe4         | 4.65E-07    | 0.699842154 |
| ENSMUSG00000052727 | Map1b         | 4.20E-05    | 0.699796352 |
| ENSMUSG00000043439 | Epop          | 6.53E-14    | 0.698644954 |
| ENSMUSG00000074121 | Ntf5          | 1.08E-09    | 0.698105825 |
| ENSMUSG00000028883 | Sema3a        | 1.52E-19    | 0.697702999 |
| ENSMUSG00000054469 | Lclat1        | 8.90E-13    | 0.693568558 |
| ENSMUSG00000024109 | Nrxn1         | 0.048498107 | 0.692347599 |
| ENSMUSG00000072623 | Zfp9          | 0.000466934 | 0.692335744 |
| ENSMUSG00000049999 | Ppp1r3d       | 5.24E-10    | 0.691456034 |
| ENSMUSG00000023915 | Tnfrsf21      | 1.47E-15    | 0.690132153 |
| ENSMUSG00000025340 | Rabgef1       | 2.22E-19    | 0.688762308 |
| ENSMUSG00000036052 | Dnaja5        | 5.40E-08    | 0.688017992 |
| ENSMUSG00000054675 | Tmem119       | 0.021297817 | 0.688015059 |
| ENSMUSG00000039328 | Rnf122        | 7.03E-05    | 0.687019646 |
| ENSMUSG00000020941 | Map3k14       | 0.00080532  | 0.685180467 |
| ENSMUSG00000030411 | Nova2         | 0.01718639  | 0.684487939 |
| ENSMUSG00000036902 | Neto2         | 2.36E-08    | 0.684247477 |
| ENSMUSG00000054893 | Zfp667        | 0.000176729 | 0.683550908 |
| ENSMUSG00000023411 | Nfatc4        | 0.000596945 | 0.68285196  |
| ENSMUSG00000032115 | Hyou1         | 2.17E-17    | 0.681260988 |
| ENSMUSG00000056888 | Glipr1        | 0.000312367 | 0.679779486 |

|                    |               |             |             |
|--------------------|---------------|-------------|-------------|
| ENSMUSG00000071547 | Nt5dc2        | 0.002329893 | 0.678416708 |
| ENSMUSG00000033960 | Jcad          | 0.004303852 | 0.678369346 |
| ENSMUSG00000024548 | Setbp1        | 5.69E-10    | 0.677002374 |
| ENSMUSG00000028047 | Thbs3         | 0.040168247 | 0.676307521 |
| ENSMUSG00000025912 | Mybl1         | 0.000331175 | 0.675887382 |
| ENSMUSG00000020262 | Adarb1        | 8.83E-05    | 0.672115521 |
| ENSMUSG0000001227  | Sema6b        | 0.037977419 | 0.671367864 |
| ENSMUSG00000026796 | Fam129b       | 0.00852395  | 0.671314707 |
| ENSMUSG00000030208 | Emp1          | 0.000974327 | 0.669046239 |
| ENSMUSG00000047638 | Nr1h4         | 0.007011408 | 0.668965954 |
| ENSMUSG00000085795 | Zfp703        | 1.63E-24    | 0.667316881 |
| ENSMUSG00000032085 | Tagln         | 5.79E-05    | 0.667109238 |
| ENSMUSG00000066258 | Trim12a       | 0.045552908 | 0.666500161 |
| ENSMUSG00000115661 | AC169038.1    | 0.004076985 | 0.66590652  |
| ENSMUSG00000036368 | Rmdn2         | 1.70E-07    | 0.665883902 |
| ENSMUSG00000032415 | Ube2cbp       | 0.005847266 | 0.665479905 |
| ENSMUSG00000026566 | Mpzl1         | 1.74E-14    | 0.66507673  |
| ENSMUSG00000040721 | Zfhx2         | 8.06E-06    | 0.664253728 |
| ENSMUSG00000026930 | Gpsm1         | 3.89E-08    | 0.662702437 |
| ENSMUSG00000070802 | Pnmal2        | 0.002888965 | 0.661383607 |
| ENSMUSG00000048264 | Dip2c         | 1.50E-05    | 0.660678579 |
| ENSMUSG00000015745 | Plekho1       | 7.82E-18    | 0.660443223 |
| ENSMUSG00000012609 | Ttll5         | 7.67E-11    | 0.660370977 |
| ENSMUSG00000050192 | Eif5a2        | 8.46E-12    | 0.659883173 |
| ENSMUSG00000026639 | Lamb3         | 0.040763876 | 0.659695892 |
| ENSMUSG00000027087 | Itgav         | 3.07E-07    | 0.658955637 |
| ENSMUSG00000025268 | Maged2        | 1.68E-17    | 0.657685861 |
| ENSMUSG00000041235 | Chd7          | 0.002233448 | 0.656634759 |
| ENSMUSG00000026207 | Speg          | 1.21E-09    | 0.656374261 |
| ENSMUSG00000049881 | 2810025M15Rik | 4.51E-05    | 0.655809614 |
| ENSMUSG00000038871 | Bpgm          | 1.08E-07    | 0.655743144 |
| ENSMUSG00000042659 | Arrdc4        | 0.001563592 | 0.654963818 |
| ENSMUSG00000040690 | Col16a1       | 1.15E-06    | 0.652637365 |
| ENSMUSG00000052364 | B630019K06Rik | 4.36E-09    | 0.651861037 |
| ENSMUSG00000030753 | Thap12        | 2.76E-06    | 0.650876075 |
| ENSMUSG00000029761 | Cald1         | 2.99E-27    | 0.650720912 |
| ENSMUSG00000020668 | Kif3c         | 2.31E-11    | 0.650138255 |
| ENSMUSG00000044566 | Cage1         | 0.016213587 | 0.649189314 |
| ENSMUSG00000048647 | Exd1          | 0.000124158 | 0.64856216  |
| ENSMUSG00000015143 | Actn1         | 3.21E-05    | 0.64848799  |
| ENSMUSG00000059674 | Cdh24         | 5.31E-08    | 0.648164438 |
| ENSMUSG00000072066 | 6720489N17Rik | 6.56E-05    | 0.647626171 |
| ENSMUSG00000038463 | Olfml2b       | 3.95E-32    | 0.647080575 |
| ENSMUSG00000051950 | B3glct        | 0.006840415 | 0.647020951 |
| ENSMUSG00000030643 | Rab30         | 0.002476521 | 0.646630035 |
| ENSMUSG00000033722 | BC034090      | 0.03406876  | 0.646228886 |
| ENSMUSG00000036139 | Hoxc9         | 1.43E-17    | 0.644904382 |

|                     |           |             |             |
|---------------------|-----------|-------------|-------------|
| ENSMUSG00000028364  | Tnc       | 0.002547499 | 0.644451647 |
| ENSMUSG00000022607  | Ptk2      | 0.000351111 | 0.643659083 |
| ENSMUSG00000031119  | Gpc4      | 3.32E-32    | 0.642916142 |
| ENSMUSG00000015222  | Map2      | 0.000493529 | 0.642707044 |
| ENSMUSG00000110105  | Gm45844   | 0.047348688 | 0.641501808 |
| ENSMUSG00000050288  | Fzd2      | 1.26E-18    | 0.640832603 |
| ENSMUSG00000034173  | Zbed5     | 0.011625604 | 0.640748233 |
| ENSMUSG00000062127  | Cttnbp2nl | 1.33E-12    | 0.640110839 |
| ENSMUSG00000058498  | Rnf207    | 0.035900597 | 0.639151184 |
| ENSMUSG00000044968  | Napepld   | 1.03E-12    | 0.638975312 |
| ENSMUSG00000073987  | Ggh       | 6.78E-09    | 0.637415611 |
| ENSMUSG00000010047  | Hyal2     | 2.54E-10    | 0.636431269 |
| ENSMUSG00000049670  | Morn4     | 8.56E-08    | 0.635377702 |
| ENSMUSG00000007039  | Ddah2     | 5.31E-19    | 0.635044308 |
| ENSMUSG00000002289  | Angptl4   | 2.39E-14    | 0.634913668 |
| ENSMUSG00000016918  | Sulf1     | 2.12E-17    | 0.634885408 |
| ENSMUSG00000033256  | Shf       | 0.000452449 | 0.634391145 |
| ENSMUSG000000051457 | Spn       | 0.000258778 | 0.633476262 |
| ENSMUSG00000028266  | Lmo4      | 2.78E-31    | 0.633017381 |
| ENSMUSG00000034685  | Fam171a2  | 3.11E-06    | 0.632025928 |
| ENSMUSG00000047821  | Trim16    | 3.04E-05    | 0.631825436 |
| ENSMUSG00000051615  | Rap2a     | 7.42E-31    | 0.631289629 |
| ENSMUSG00000059811  | Atl2      | 5.26E-30    | 0.631272106 |
| ENSMUSG00000040699  | Limd2     | 2.65E-15    | 0.631004954 |
| ENSMUSG00000003992  | Ssbp2     | 4.26E-24    | 0.630689166 |
| ENSMUSG00000014786  | Slc9a5    | 5.08E-05    | 0.630261671 |
| ENSMUSG00000019951  | Uhrf1bp1l | 4.88E-11    | 0.62960282  |
| ENSMUSG00000020123  | Avpr1a    | 0.013749911 | 0.628506049 |
| ENSMUSG00000078532  | Nkain1    | 1.63E-05    | 0.627606067 |
| ENSMUSG00000025907  | Rb1cc1    | 1.73E-15    | 0.627449176 |
| ENSMUSG00000019948  | Actr6     | 1.83E-06    | 0.627329095 |
| ENSMUSG00000020900  | Myh10     | 0.000878948 | 0.626782822 |
| ENSMUSG00000028040  | Efna4     | 1.74E-10    | 0.626729777 |
| ENSMUSG00000037408  | Cnm4      | 0.001858544 | 0.625782929 |
| ENSMUSG00000031207  | Msn       | 2.45E-11    | 0.625417365 |
| ENSMUSG00000026433  | Rab29     | 2.26E-08    | 0.620311273 |
| ENSMUSG00000048240  | Gng7      | 0.001246329 | 0.617970024 |
| ENSMUSG00000035692  | Isg15     | 0.001619381 | 0.617830683 |
| ENSMUSG00000036667  | Tcaf1     | 7.55E-12    | 0.617403087 |
| ENSMUSG00000028630  | Dyrk2     | 2.56E-05    | 0.61726423  |
| ENSMUSG00000050503  | Fbxl22    | 4.68E-05    | 0.616578928 |
| ENSMUSG00000026627  | Tmem206   | 6.78E-11    | 0.615749572 |
| ENSMUSG00000013611  | Snx31     | 3.34E-06    | 0.615648775 |
| ENSMUSG00000045062  | Pcdhb7    | 2.68E-05    | 0.615321143 |
| ENSMUSG00000026447  | Pik3c2b   | 0.015918353 | 0.613810887 |
| ENSMUSG00000001555  | Fkbp10    | 2.20E-08    | 0.613465692 |
| ENSMUSG00000004508  | Gab2      | 1.49E-11    | 0.612867673 |

|                    |               |             |             |
|--------------------|---------------|-------------|-------------|
| ENSMUSG00000037138 | Aff3          | 0.036635413 | 0.61157488  |
| ENSMUSG00000041343 | Ankrd42       | 1.00E-05    | 0.611447803 |
| ENSMUSG00000022537 | Tmem44        | 0.001101092 | 0.609372795 |
| ENSMUSG00000046841 | Ckap4         | 8.10E-06    | 0.608273831 |
| ENSMUSG00000054720 | Lrrc8c        | 0.002046545 | 0.607485252 |
| ENSMUSG00000053617 | Sh3pxd2a      | 1.62E-28    | 0.607191399 |
| ENSMUSG00000055980 | Irs1          | 0.006881259 | 0.606952064 |
| ENSMUSG00000028926 | Cdk14         | 1.47E-15    | 0.60567854  |
| ENSMUSG00000103677 | Pcdhga4       | 0.012003304 | 0.604823959 |
| ENSMUSG00000030835 | Nomo1         | 2.24E-21    | 0.604713363 |
| ENSMUSG00000111619 | Gm48348       | 0.010305386 | 0.604346046 |
| ENSMUSG00000029207 | Apbb2         | 4.59E-08    | 0.601939676 |
| ENSMUSG00000007207 | Stx1a         | 0.026807257 | 0.600429262 |
| ENSMUSG00000048644 | Ctxn1         | 7.74E-11    | 0.600347277 |
| ENSMUSG00000025969 | Nrp2          | 1.15E-10    | 0.599404205 |
| ENSMUSG00000021180 | Rps6ka5       | 3.23E-08    | 0.599122899 |
| ENSMUSG00000033149 | Phldb2        | 4.27E-19    | 0.598976398 |
| ENSMUSG00000020029 | Nudt4         | 1.05E-27    | 0.598298836 |
| ENSMUSG00000040711 | Sh3pxd2b      | 1.41E-26    | 0.597685792 |
| ENSMUSG00000065979 | Cpped1        | 9.60E-24    | 0.596894476 |
| ENSMUSG00000061603 | Akap6         | 0.029518718 | 0.596087108 |
| ENSMUSG00000085642 | 3110053B16Rik | 0.001870719 | 0.596084385 |
| ENSMUSG00000064141 | Zfp69         | 0.023311578 | 0.595559523 |
| ENSMUSG00000024043 | Arhgap28      | 0.00675244  | 0.59524663  |
| ENSMUSG00000038402 | Foxf2         | 0.000783745 | 0.594834835 |
| ENSMUSG00000071855 | Ccdc112       | 4.43E-06    | 0.593531067 |
| ENSMUSG00000046879 | Irgm1         | 5.54E-27    | 0.59304194  |
| ENSMUSG00000024420 | Zfp521        | 1.59E-15    | 0.592496147 |
| ENSMUSG00000026274 | Pask          | 0.001609336 | 0.591985668 |
| ENSMUSG00000030095 | Tmem43        | 9.87E-05    | 0.591233481 |
| ENSMUSG00000029672 | Fam3c         | 2.28E-18    | 0.590337581 |
| ENSMUSG00000020649 | Rrm2          | 0.00631163  | 0.590318539 |
| ENSMUSG00000030782 | Tgfb1i1       | 0.000109699 | 0.590233173 |
| ENSMUSG00000032334 | Loxl1         | 4.51E-26    | 0.590231627 |
| ENSMUSG00000019891 | Dcbld1        | 5.46E-10    | 0.58976223  |
| ENSMUSG00000025289 | Prdx4         | 1.36E-26    | 0.58970646  |
| ENSMUSG00000026748 | Plxdc2        | 6.76E-15    | 0.589627965 |
| ENSMUSG00000079444 | Gm21981       | 0.017506518 | 0.589116865 |
| ENSMUSG00000114025 | AC154636.2    | 0.030818068 | 0.587249118 |
| ENSMUSG00000019986 | Ahi1          | 8.52E-10    | 0.586696003 |
| ENSMUSG00000035314 | Gdpd5         | 0.000760071 | 0.585075403 |
| ENSMUSG00000019055 | Plod1         | 4.69E-11    | 0.584592186 |
| ENSMUSG00000019189 | Rnf145        | 1.60E-10    | 0.584190634 |
| ENSMUSG00000029552 | Tes           | 1.15E-23    | 0.583477913 |
| ENSMUSG00000051486 | Pcdhb11       | 0.043240845 | 0.583125716 |
| ENSMUSG00000012396 | Nanog         | 0.006315653 | 0.582167189 |
| ENSMUSG00000025157 | Zdhhc16       | 1.56E-05    | 0.580835083 |



|                    |         |             |             |
|--------------------|---------|-------------|-------------|
| ENSMUSG00000024063 | Lbh     | 7.85E-21    | 0.579880034 |
| ENSMUSG00000042364 | Snx18   | 0.000261656 | 0.579465198 |
| ENSMUSG00000027799 | Nbea    | 3.41E-23    | 0.577659092 |
| ENSMUSG00000041491 | Cep78   | 1.26E-09    | 0.577532947 |
| ENSMUSG00000039137 | Whrn    | 0.02113886  | 0.577371916 |
| ENSMUSG00000078794 | Dact3   | 0.004582558 | 0.577031836 |
| ENSMUSG00000033209 | Ttc28   | 9.59E-07    | 0.57566196  |
| ENSMUSG00000019979 | Apaf1   | 2.59E-07    | 0.574724957 |
| ENSMUSG00000036106 | Prr5    | 9.92E-06    | 0.574039369 |
| ENSMUSG00000028007 | Snx7    | 1.73E-07    | 0.573480235 |
| ENSMUSG00000031375 | Bgn     | 3.59E-15    | 0.573345856 |
| ENSMUSG00000026131 | Dst     | 3.92E-10    | 0.572357458 |
| ENSMUSG00000034525 | Ice1    | 1.05E-05    | 0.572278594 |
| ENSMUSG00000041957 | Pkp2    | 1.82E-09    | 0.571776468 |
| ENSMUSG00000032035 | Ets1    | 0.000253977 | 0.571580425 |
| ENSMUSG00000057234 | Mettl15 | 0.002099812 | 0.570588713 |
| ENSMUSG00000015133 | Lrrk1   | 0.000264926 | 0.569654614 |
| ENSMUSG00000053004 | Hrh1    | 0.00176876  | 0.569267618 |
| ENSMUSG00000020986 | Sec23a  | 9.65E-09    | 0.56874818  |
| ENSMUSG00000025278 | Flnb    | 0.008214712 | 0.568268311 |
| ENSMUSG00000033436 | Armcx2  | 1.39E-24    | 0.567451743 |
| ENSMUSG00000045211 | Nudt18  | 4.14E-05    | 0.566830255 |
| ENSMUSG00000020108 | Ddit4   | 4.27E-19    | 0.566361051 |
| ENSMUSG0000002068  | Ccne1   | 6.43E-06    | 0.565203786 |
| ENSMUSG00000029376 | Mthfd2l | 3.71E-05    | 0.564454431 |
| ENSMUSG00000029821 | Gsdme   | 0.002814612 | 0.564431041 |
| ENSMUSG00000036565 | Ttyh3   | 6.84E-17    | 0.563600106 |
| ENSMUSG00000028848 | Gpn2    | 2.32E-06    | 0.563497879 |
| ENSMUSG00000028456 | Unc13b  | 6.05E-14    | 0.562892718 |
| ENSMUSG00000039693 | Msantd3 | 0.007887657 | 0.562694076 |
| ENSMUSG00000027669 | Gnb4    | 0.000395802 | 0.562533092 |
| ENSMUSG00000039735 | Fnbp1l  | 5.81E-22    | 0.562512311 |
| ENSMUSG00000053137 | Mapk11  | 0.000973589 | 0.561630038 |
| ENSMUSG00000063146 | Clip2   | 9.10E-09    | 0.559272606 |
| ENSMUSG00000028763 | Hspg2   | 3.13E-17    | 0.558271178 |
| ENSMUSG00000038074 | Fkbp14  | 9.38E-06    | 0.55803061  |
| ENSMUSG00000023272 | Creld2  | 4.83E-21    | 0.5579392   |
| ENSMUSG00000014932 | Yes1    | 1.42E-13    | 0.55753566  |
| ENSMUSG00000040729 | Cep126  | 0.002455285 | 0.557351292 |
| ENSMUSG00000070476 | Fam217b | 0.007333832 | 0.556971888 |
| ENSMUSG00000068270 | Shroom4 | 6.84E-05    | 0.556854336 |
| ENSMUSG00000032656 | 03-Mar  | 9.20E-08    | 0.554610747 |
| ENSMUSG00000029101 | Rgs12   | 8.47E-07    | 0.55418043  |
| ENSMUSG00000029381 | Shroom3 | 1.23E-06    | 0.552730914 |
| ENSMUSG00000036390 | Gadd45a | 0.003745069 | 0.551742406 |
| ENSMUSG0000004317  | Clcn5   | 3.18E-17    | 0.551573867 |
| ENSMUSG00000021493 | Pdlim7  | 3.26E-21    | 0.550907209 |

|                    |               |             |             |
|--------------------|---------------|-------------|-------------|
| ENSMUSG00000001700 | Gramd3        | 7.41E-06    | 0.549291955 |
| ENSMUSG00000079173 | Zan           | 0.033074732 | 0.549147827 |
| ENSMUSG00000028389 | Zfp37         | 0.001017787 | 0.547776494 |
| ENSMUSG00000005357 | Slc1a6        | 6.12E-06    | 0.547704092 |
| ENSMUSG00000034205 | Loxl2         | 1.21E-06    | 0.546647436 |
| ENSMUSG00000066043 | Phactr4       | 0.019538117 | 0.545684479 |
| ENSMUSG00000037852 | Cpe           | 9.92E-07    | 0.545532062 |
| ENSMUSG00000024232 | Bambi         | 0.027412821 | 0.545132997 |
| ENSMUSG00000066894 | Vsig10        | 0.002885394 | 0.544213249 |
| ENSMUSG00000025867 | Cplx2         | 0.000741571 | 0.544034105 |
| ENSMUSG00000039942 | Ptger4        | 0.015725475 | 0.543912805 |
| ENSMUSG00000020230 | Prmt2         | 6.15E-14    | 0.543794267 |
| ENSMUSG00000028643 | Svbp          | 1.29E-08    | 0.543785189 |
| ENSMUSG00000048965 | Mrgpre        | 0.000525789 | 0.542956417 |
| ENSMUSG00000079523 | Tmsb10        | 5.56E-21    | 0.542779314 |
| ENSMUSG00000032440 | Tgfbr2        | 0.000459547 | 0.541960133 |
| ENSMUSG00000032374 | Plod2         | 2.67E-06    | 0.541722955 |
| ENSMUSG00000024533 | Spire1        | 1.84E-05    | 0.540594988 |
| ENSMUSG00000056486 | Chn1          | 3.32E-05    | 0.540544954 |
| ENSMUSG00000025666 | Tmem47        | 0.01505835  | 0.540347537 |
| ENSMUSG00000035372 | 1810055G02Rik | 5.60E-05    | 0.538615136 |
| ENSMUSG00000040258 | Nxph4         | 0.001359865 | 0.537606247 |
| ENSMUSG00000047996 | Prrg1         | 0.001283773 | 0.536629536 |
| ENSMUSG00000037440 | Vnn1          | 0.001688321 | 0.536129857 |
| ENSMUSG00000037855 | Zfp365        | 0.000425135 | 0.536081598 |
| ENSMUSG00000020361 | Hspa4         | 5.92E-19    | 0.534728533 |
| ENSMUSG00000037032 | Apbb1         | 1.13E-06    | 0.534666651 |
| ENSMUSG00000074634 | Tmem267       | 2.55E-06    | 0.533917576 |
| ENSMUSG00000037306 | Man1c1        | 1.26E-11    | 0.533812326 |
| ENSMUSG00000030761 | Myo7a         | 0.000906984 | 0.532927778 |
| ENSMUSG00000037697 | Dhd1          | 0.006288126 | 0.53253803  |
| ENSMUSG00000026193 | Fn1           | 1.21E-14    | 0.53252898  |
| ENSMUSG00000029710 | Ephb4         | 7.80E-18    | 0.532433654 |
| ENSMUSG00000041936 | Agrn          | 0.001505466 | 0.53202993  |
| ENSMUSG00000049536 | Tceal1        | 0.026916925 | 0.531459372 |
| ENSMUSG00000025352 | Gdf11         | 2.00E-16    | 0.531374269 |
| ENSMUSG00000009246 | Trpm5         | 0.000433777 | 0.531265154 |
| ENSMUSG00000029869 | Ephb6         | 0.000564983 | 0.531240578 |
| ENSMUSG00000030554 | Sym           | 0.000512169 | 0.530685563 |
| ENSMUSG00000026827 | Gpd2          | 6.09E-07    | 0.530439138 |
| ENSMUSG00000042331 | Specc1        | 1.03E-11    | 0.530046179 |
| ENSMUSG00000036672 | Cenpt         | 1.57E-06    | 0.52931952  |
| ENSMUSG00000017386 | Traf4         | 3.85E-08    | 0.528486255 |
| ENSMUSG00000028018 | Gstcd         | 0.00055027  | 0.528437141 |
| ENSMUSG00000029781 | Fkbp9         | 8.78E-22    | 0.527071341 |
| ENSMUSG00000034595 | Ppp1r18       | 1.92E-06    | 0.526186898 |
| ENSMUSG00000034109 | Golim4        | 9.57E-16    | 0.525111868 |

|                    |          |             |             |
|--------------------|----------|-------------|-------------|
| ENSMUSG00000024777 | Ppp2r5b  | 0.000236265 | 0.525111039 |
| ENSMUSG00000107330 | Ppp2r5b  | 0.000236265 | 0.525111039 |
| ENSMUSG00000047307 | Pcdhb13  | 0.002188717 | 0.524551417 |
| ENSMUSG00000049184 | Purg     | 4.99E-06    | 0.523111292 |
| ENSMUSG00000050064 | Zfp697   | 1.33E-11    | 0.52303991  |
| ENSMUSG00000004665 | Cnn2     | 2.05E-05    | 0.5222186   |
| ENSMUSG00000048997 | Atxn7l2  | 0.008528937 | 0.52212129  |
| ENSMUSG00000044367 | Slc16a13 | 1.74E-05    | 0.522062739 |
| ENSMUSG00000041420 | Meis3    | 8.07E-06    | 0.52127308  |
| ENSMUSG00000027737 | Slc7a11  | 3.98E-05    | 0.520610583 |
| ENSMUSG00000024937 | Ehbp1l1  | 0.046428321 | 0.519882475 |
| ENSMUSG00000044583 | Tlr7     | 1.16E-08    | 0.519359016 |
| ENSMUSG00000021068 | Nin      | 3.12E-05    | 0.518832828 |
| ENSMUSG00000041958 | Pigs     | 5.24E-19    | 0.518632128 |
| ENSMUSG00000025507 | Pidd1    | 0.007109576 | 0.518325484 |
| ENSMUSG00000041298 | Katnal1  | 3.45E-07    | 0.518215196 |
| ENSMUSG00000036306 | Lzts1    | 0.035751835 | 0.518124146 |
| ENSMUSG00000064181 | Rab3ip   | 1.41E-10    | 0.516961415 |
| ENSMUSG00000030536 | Iqgap1   | 2.70E-06    | 0.516846395 |
| ENSMUSG00000038349 | Plcl1    | 6.84E-11    | 0.512817899 |
| ENSMUSG00000114455 | Gm48797  | 0.016707383 | 0.512721754 |
| ENSMUSG00000035735 | Dagla    | 8.40E-06    | 0.512460759 |
| ENSMUSG00000020099 | Unc5b    | 1.63E-06    | 0.512270339 |
| ENSMUSG00000033102 | Cdc14b   | 6.02E-09    | 0.510979616 |
| ENSMUSG00000028226 | Mmp16    | 1.93E-13    | 0.510907388 |
| ENSMUSG00000039908 | Slc26a11 | 6.52E-07    | 0.510239681 |
| ENSMUSG00000032340 | Neo1     | 1.10E-11    | 0.509538511 |
| ENSMUSG00000062519 | Zfp398   | 3.44E-08    | 0.509495501 |
| ENSMUSG00000031885 | Cbfb     | 3.14E-19    | 0.509374706 |
| ENSMUSG00000030123 | Plxnd1   | 0.00564515  | 0.508331465 |
| ENSMUSG00000042807 | Hecw2    | 0.00858598  | 0.508318152 |
| ENSMUSG00000002771 | Grin2d   | 0.046391358 | 0.508312696 |
| ENSMUSG00000034152 | Exoc3    | 2.02E-07    | 0.508051659 |
| ENSMUSG00000022454 | Nell2    | 0.032707351 | 0.507146314 |
| ENSMUSG00000038059 | Smim3    | 0.011891249 | 0.506354386 |
| ENSMUSG00000040187 | Arntl2   | 0.028130658 | 0.506169388 |
| ENSMUSG00000010660 | Plcd1    | 3.61E-06    | 0.505689973 |
| ENSMUSG00000048807 | Slc35e4  | 0.016770203 | 0.505249014 |
| ENSMUSG00000014592 | Camta1   | 0.029698266 | 0.502551165 |
| ENSMUSG00000048200 | Cracr2b  | 0.000886332 | 0.502129808 |
| ENSMUSG00000032932 | Hspa13   | 0.00011807  | 0.502016406 |
| ENSMUSG00000021057 | Akap5    | 0.000161646 | 0.500217047 |
| ENSMUSG00000022197 | Pdzd2    | 4.06E-06    | 0.49829143  |
| ENSMUSG00000050957 | Insl6    | 0.009362075 | 0.498028348 |
| ENSMUSG0000002900  | Lamb1    | 0.000651566 | 0.497774835 |
| ENSMUSG00000027878 | Notch2   | 4.18E-11    | 0.497441012 |
| ENSMUSG00000015217 | Hmgb3    | 1.32E-16    | 0.497203129 |

|                     |               |             |             |
|---------------------|---------------|-------------|-------------|
| ENSMUSG00000039474  | Wfs1          | 2.16E-11    | 0.496903374 |
| ENSMUSG00000020048  | Hsp90b1       | 1.07E-17    | 0.49666656  |
| ENSMUSG00000044948  | Cfap43        | 4.73E-16    | 0.496137812 |
| ENSMUSG00000020814  | Mxra7         | 5.89E-17    | 0.49579762  |
| ENSMUSG00000022433  | Csnk1e        | 5.42E-12    | 0.495636733 |
| ENSMUSG00000019779  | Frk           | 2.65E-07    | 0.494060335 |
| ENSMUSG00000036957  | Lfn3          | 0.000672775 | 0.493762345 |
| ENSMUSG00000013974  | Mcomp1        | 0.000126094 | 0.493672906 |
| ENSMUSG00000027253  | Lrp4          | 0.037772943 | 0.492944567 |
| ENSMUSG00000076431  | Sox4          | 1.38E-07    | 0.491824729 |
| ENSMUSG00000021732  | Fgf10         | 1.41E-06    | 0.491008706 |
| ENSMUSG00000006720  | Zfp184        | 0.000714067 | 0.490804028 |
| ENSMUSG00000022440  | C1qtnf6       | 0.015798231 | 0.489531077 |
| ENSMUSG00000028041  | Adam15        | 3.56E-08    | 0.48909114  |
| ENSMUSG00000020089  | Ppa1          | 0.029375637 | 0.488238705 |
| ENSMUSG00000028776  | Tinagl1       | 5.86E-10    | 0.488234741 |
| ENSMUSG00000033697  | Arhgap39      | 0.002538947 | 0.487242156 |
| ENSMUSG00000028212  | Ccne2         | 0.000226157 | 0.487065106 |
| ENSMUSG00000030313  | Dennd5b       | 5.33E-05    | 0.48696771  |
| ENSMUSG00000024590  | Lmn1          | 2.17E-07    | 0.486770739 |
| ENSMUSG00000006445  | Epha2         | 0.008546919 | 0.486000341 |
| ENSMUSG00000022178  | Ajuba         | 1.30E-07    | 0.485389924 |
| ENSMUSG00000032470  | Mras          | 8.16E-15    | 0.484065436 |
| ENSMUSG00000075033  | Nxpe3         | 0.000153288 | 0.483785724 |
| ENSMUSG00000037541  | Shank2        | 0.01365283  | 0.483639526 |
| ENSMUSG00000027340  | Slc23a2       | 0.008272165 | 0.483446486 |
| ENSMUSG00000027985  | Lef1          | 0.018563728 | 0.482545345 |
| ENSMUSG00000014303  | Glis2         | 4.09E-08    | 0.482415337 |
| ENSMUSG00000059939  | 9430015G10Rik | 0.012984877 | 0.482298921 |
| ENSMUSG000000068114 | Ccdc134       | 0.001756947 | 0.481717818 |
| ENSMUSG00000037225  | Fgf2          | 0.009825747 | 0.481479272 |
| ENSMUSG00000047067  | Dusp28        | 0.032109705 | 0.480507694 |
| ENSMUSG00000024538  | Ppic          | 6.37E-18    | 0.479587701 |
| ENSMUSG00000028385  | Snx30         | 0.04753498  | 0.479412416 |
| ENSMUSG00000023066  | Rtnn          | 3.34E-05    | 0.478501908 |
| ENSMUSG00000103144  | Pcdhga1       | 0.023768059 | 0.478064984 |
| ENSMUSG000000052698 | Tln2          | 0.004746316 | 0.477796749 |
| ENSMUSG00000044864  | Ankrd50       | 2.42E-09    | 0.477677137 |
| ENSMUSG00000002844  | Adprh         | 5.22E-11    | 0.477405629 |
| ENSMUSG00000024769  | Cdc42bpg      | 8.75E-06    | 0.476533472 |
| ENSMUSG00000107268  | Cdc42bpg      | 8.75E-06    | 0.476533472 |
| ENSMUSG00000024087  | Cyp1b1        | 0.010182978 | 0.476499459 |
| ENSMUSG00000020520  | Galnt10       | 5.86E-06    | 0.475510786 |
| ENSMUSG000000009418 | Nav1          | 3.28E-07    | 0.4754847   |
| ENSMUSG00000025875  | Tspan17       | 0.004110439 | 0.475061051 |
| ENSMUSG00000006731  | B4galnt1      | 0.039483971 | 0.472902236 |
| ENSMUSG00000030403  | Vasp          | 3.17E-07    | 0.472489252 |

|                    |            |             |             |
|--------------------|------------|-------------|-------------|
| ENSMUSG00000029570 | Lfng       | 3.29E-05    | 0.472368179 |
| ENSMUSG00000026470 | Stx6       | 4.10E-05    | 0.470910316 |
| ENSMUSG00000035062 | Zc4h2      | 1.08E-07    | 0.470599874 |
| ENSMUSG00000024174 | Pot1b      | 0.000621795 | 0.469807064 |
| ENSMUSG00000098835 | AC182748.1 | 0.000621795 | 0.469807064 |
| ENSMUSG00000034303 | Ccdc15     | 0.00026747  | 0.469050938 |
| ENSMUSG00000037972 | Snn        | 1.05E-09    | 0.468087542 |
| ENSMUSG00000016128 | Stard13    | 0.00454552  | 0.467836344 |
| ENSMUSG00000030811 | Fbxl19     | 3.77E-07    | 0.467215761 |
| ENSMUSG00000025234 | Arih1      | 9.72E-05    | 0.466677234 |
| ENSMUSG00000070047 | Fat1       | 4.58E-07    | 0.466657364 |
| ENSMUSG00000015341 | Golga7     | 4.99E-05    | 0.466444179 |
| ENSMUSG00000034055 | Phka1      | 2.19E-06    | 0.465946749 |
| ENSMUSG00000037820 | Tgm2       | 0.000822814 | 0.465444026 |
| ENSMUSG00000087141 | Plcx2      | 0.035275616 | 0.465412309 |
| ENSMUSG00000107770 | Gm44126    | 0.00023451  | 0.46501041  |
| ENSMUSG00000037722 | Gnpnat1    | 0.006179052 | 0.464995356 |
| ENSMUSG00000042460 | C1galt1    | 1.19E-06    | 0.464790699 |
| ENSMUSG00000022246 | Rai14      | 6.27E-17    | 0.463887859 |
| ENSMUSG00000022306 | Zfpm2      | 2.29E-08    | 0.462867936 |
| ENSMUSG00000036904 | Fzd8       | 3.92E-08    | 0.462587788 |
| ENSMUSG00000028078 | Dclk2      | 0.033765064 | 0.461662705 |
| ENSMUSG00000031024 | St5        | 1.16E-08    | 0.461603399 |
| ENSMUSG00000036968 | Cnpy4      | 5.12E-08    | 0.460993742 |
| ENSMUSG00000051242 | Pcdhb9     | 0.037348607 | 0.460463454 |
| ENSMUSG00000021277 | Traf3      | 3.33E-11    | 0.460385317 |
| ENSMUSG00000024773 | Atg2a      | 4.05E-07    | 0.460305745 |
| ENSMUSG00000106907 | Atg2a      | 4.05E-07    | 0.460305745 |
| ENSMUSG00000013236 | Ptprs      | 9.03E-11    | 0.459930807 |
| ENSMUSG00000029090 | Adgra3     | 2.56E-11    | 0.459930482 |
| ENSMUSG0000007989  | Fzd3       | 0.003109914 | 0.459707714 |
| ENSMUSG00000066235 | Pomgnt2    | 0.001907845 | 0.459161126 |
| ENSMUSG00000057530 | Ece1       | 0.027343579 | 0.458691353 |
| ENSMUSG00000021504 | B4galt7    | 0.001103585 | 0.458420839 |
| ENSMUSG00000052798 | Nup107     | 0.029730804 | 0.458366209 |
| ENSMUSG00000037386 | Rims2      | 6.94E-05    | 0.458347066 |
| ENSMUSG00000020737 | Hn1        | 3.41E-15    | 0.45801468  |
| ENSMUSG00000049470 | Aff4       | 5.72E-08    | 0.458011486 |
| ENSMUSG00000020553 | Pctp       | 0.007692687 | 0.457428632 |
| ENSMUSG00000019820 | Utrn       | 2.90E-07    | 0.457192247 |
| ENSMUSG00000031963 | Bmper      | 1.07E-14    | 0.457056419 |
| ENSMUSG00000037552 | Plekhg2    | 2.22E-09    | 0.455983314 |
| ENSMUSG00000045348 | Nyap1      | 3.14E-05    | 0.455884761 |
| ENSMUSG00000022637 | Cblb       | 0.000240246 | 0.455197436 |
| ENSMUSG00000019796 | Lrp11      | 4.41E-07    | 0.454139079 |
| ENSMUSG00000116377 | AC156391.4 | 4.41E-07    | 0.454139079 |
| ENSMUSG00000079037 | Prnp       | 2.45E-16    | 0.454086764 |

|                    |               |             |             |
|--------------------|---------------|-------------|-------------|
| ENSMUSG00000034930 | Rtkn          | 0.016576027 | 0.453887357 |
| ENSMUSG00000034731 | Dgkh          | 0.024075581 | 0.452995745 |
| ENSMUSG00000042138 | Msantd2       | 0.008385609 | 0.452913497 |
| ENSMUSG00000030530 | Furin         | 0.001834755 | 0.452269171 |
| ENSMUSG00000054792 | Klhl18        | 6.84E-05    | 0.451731717 |
| ENSMUSG00000020899 | Pfas          | 0.020663434 | 0.451447291 |
| ENSMUSG00000032109 | Nlrx1         | 0.00039568  | 0.451370693 |
| ENSMUSG00000035235 | Trim13        | 0.003356439 | 0.451264943 |
| ENSMUSG00000023191 | P3h3          | 7.16E-08    | 0.45120648  |
| ENSMUSG00000042506 | Usp22         | 4.83E-08    | 0.450091053 |
| ENSMUSG00000061119 | Prcp          | 0.000176721 | 0.449411677 |
| ENSMUSG00000041000 | Trim62        | 1.42E-05    | 0.448661152 |
| ENSMUSG00000033392 | Clasp2        | 1.18E-05    | 0.44864407  |
| ENSMUSG00000024687 | Osbp          | 1.87E-15    | 0.447475982 |
| ENSMUSG00000055737 | Ghr           | 0.006331378 | 0.447068145 |
| ENSMUSG00000031669 | Gins3         | 0.001875128 | 0.446745027 |
| ENSMUSG00000018570 | 2810408A11Rik | 0.022628405 | 0.446020324 |
| ENSMUSG00000038181 | Chpf2         | 1.52E-09    | 0.445550878 |
| ENSMUSG00000045636 | Mtus1         | 2.97E-08    | 0.445016689 |
| ENSMUSG00000073176 | Zfp449        | 2.77E-06    | 0.444767948 |
| ENSMUSG00000025934 | Gsta3         | 0.00636647  | 0.4442462   |
| ENSMUSG00000033623 | Pcgf3         | 1.02E-06    | 0.444089102 |
| ENSMUSG00000034807 | Colgalt1      | 7.29E-15    | 0.443607901 |
| ENSMUSG00000078185 | Chml          | 0.000148487 | 0.443525417 |
| ENSMUSG00000039004 | Bmp6          | 1.23E-06    | 0.443163109 |
| ENSMUSG00000040785 | Ttc3          | 0.000331097 | 0.44276515  |
| ENSMUSG00000039168 | Dap           | 6.75E-05    | 0.441885184 |
| ENSMUSG00000036599 | Chst12        | 2.27E-08    | 0.441773056 |
| ENSMUSG00000021733 | Slc4a7        | 0.000179581 | 0.440461997 |
| ENSMUSG00000090213 | Tmem189       | 9.20E-11    | 0.440294962 |
| ENSMUSG00000040268 | Plekha1       | 0.000619337 | 0.440284199 |
| ENSMUSG00000061062 | Gm10093       | 1.27E-05    | 0.439932855 |
| ENSMUSG00000037553 | Zdhhc18       | 0.026834358 | 0.439897194 |
| ENSMUSG00000000531 | Grasp         | 0.017192472 | 0.439698885 |
| ENSMUSG00000043019 | Edem3         | 1.21E-13    | 0.437037471 |
| ENSMUSG00000042216 | Sgsm1         | 0.003809991 | 0.436751322 |
| ENSMUSG00000096916 | Zfp850        | 0.011702434 | 0.436358622 |
| ENSMUSG00000021990 | Spata13       | 5.38E-09    | 0.436357094 |
| ENSMUSG00000004460 | Dnajb11       | 5.68E-10    | 0.435923404 |
| ENSMUSG00000021978 | Extl3         | 1.43E-10    | 0.435842749 |
| ENSMUSG00000027472 | Pdrg1         | 3.25E-07    | 0.435666464 |
| ENSMUSG00000047407 | Tgif1         | 0.000553508 | 0.435491173 |
| ENSMUSG00000079008 | Gm14124       | 0.000136604 | 0.435056039 |
| ENSMUSG00000036002 | Fam214b       | 0.000451818 | 0.434555528 |
| ENSMUSG00000074277 | Phldb3        | 0.029698266 | 0.433033207 |
| ENSMUSG00000038388 | Mpp6          | 0.004264413 | 0.433007367 |
| ENSMUSG00000017499 | Cdc6          | 0.02990552  | 0.431802473 |

|                     |          |             |             |
|---------------------|----------|-------------|-------------|
| ENSMUSG00000004929  | Thop1    | 0.007392492 | 0.431673497 |
| ENSMUSG00000079317  | Trappc2  | 2.46E-09    | 0.43136848  |
| ENSMUSG00000034245  | Hdac11   | 0.029641463 | 0.431267373 |
| ENSMUSG00000075702  | Selenom  | 6.17E-14    | 0.431072005 |
| ENSMUSG00000024642  | Tle4     | 7.55E-12    | 0.430781683 |
| ENSMUSG00000028541  | B4galt2  | 6.61E-06    | 0.430500743 |
| ENSMUSG00000020876  | Snx11    | 0.000176721 | 0.430315118 |
| ENSMUSG00000038692  | Hoxb4    | 6.77E-05    | 0.430247631 |
| ENSMUSG00000002017  | Fam98a   | 4.11E-06    | 0.430027352 |
| ENSMUSG00000026471  | Mr1      | 0.00040814  | 0.429606014 |
| ENSMUSG000000052423 | B4galt3  | 3.37E-07    | 0.428916584 |
| ENSMUSG00000038936  | Sccpdh   | 8.56E-09    | 0.42849174  |
| ENSMUSG00000032220  | Myo1e    | 3.96E-06    | 0.428355501 |
| ENSMUSG00000044042  | Fmn1     | 0.005560392 | 0.428149962 |
| ENSMUSG000000052707 | Tnrc6a   | 6.41E-07    | 0.427373642 |
| ENSMUSG000000037907 | Ankrd13b | 9.26E-09    | 0.427325351 |
| ENSMUSG00000022443  | Myh9     | 0.004319886 | 0.427255532 |
| ENSMUSG000000044447 | Dock5    | 9.63E-09    | 0.426994104 |
| ENSMUSG000000041189 | Chrn1    | 2.30E-07    | 0.42606715  |
| ENSMUSG000000078517 | Emc1     | 1.84E-05    | 0.425448542 |
| ENSMUSG000000037788 | Vopp1    | 4.41E-12    | 0.425016875 |
| ENSMUSG000000042197 | Zfp451   | 3.85E-06    | 0.424469685 |
| ENSMUSG000000032997 | Chpf     | 4.21E-13    | 0.424429601 |
| ENSMUSG000000026814 | Eng      | 0.038409962 | 0.424377175 |
| ENSMUSG000000058056 | Palld    | 0.03051581  | 0.424333378 |
| ENSMUSG000000056602 | Fry      | 0.005344465 | 0.423537486 |
| ENSMUSG000000021745 | Ptprg    | 4.31E-07    | 0.423268742 |
| ENSMUSG000000026864 | Hspa5    | 1.01E-08    | 0.422912132 |
| ENSMUSG000000049717 | Lig4     | 3.84E-06    | 0.422669535 |
| ENSMUSG000000067336 | Bmpr2    | 1.21E-05    | 0.422432448 |
| ENSMUSG000000035051 | Dhx57    | 1.80E-10    | 0.422228726 |
| ENSMUSG000000027907 | S100a11  | 0.000447309 | 0.419692733 |
| ENSMUSG00000016933  | Plcg1    | 1.67E-10    | 0.419402337 |
| ENSMUSG00000017288  | Vps53    | 4.93E-05    | 0.418977055 |
| ENSMUSG000000047767 | Atg16l2  | 0.005016369 | 0.418776983 |
| ENSMUSG000000030641 | Ddias    | 0.002201071 | 0.418258096 |
| ENSMUSG000000026918 | Brd3     | 3.13E-10    | 0.418177619 |
| ENSMUSG00000013150  | Gfod2    | 0.01638736  | 0.417915774 |
| ENSMUSG000000020185 | E2f7     | 0.011001673 | 0.417497506 |
| ENSMUSG000000003134 | Tbc1d8   | 0.022085189 | 0.417273253 |
| ENSMUSG000000073910 | Mob3b    | 2.43E-06    | 0.417014061 |
| ENSMUSG000000000308 | Ckmt1    | 1.99E-05    | 0.416935919 |
| ENSMUSG00000002718  | Cse1l    | 0.004784404 | 0.416802184 |
| ENSMUSG000000027782 | Kpna4    | 7.20E-13    | 0.416764212 |
| ENSMUSG000000051147 | Nat2     | 3.36E-06    | 0.416541608 |
| ENSMUSG000000031328 | Flna     | 1.13E-06    | 0.416489058 |
| ENSMUSG000000031790 | Mmp15    | 0.026312124 | 0.416372484 |

|                    |                |             |             |
|--------------------|----------------|-------------|-------------|
| ENSMUSG00000045411 | 2410002F23Rik  | 0.004739375 | 0.416101477 |
| ENSMUSG00000047434 | Xxylt1         | 0.004437519 | 0.416066189 |
| ENSMUSG00000047238 | Mageh1         | 3.11E-06    | 0.416062435 |
| ENSMUSG00000028557 | Rnf11          | 2.73E-05    | 0.415787703 |
| ENSMUSG00000022159 | Rab2b          | 0.047348688 | 0.415718289 |
| ENSMUSG00000028718 | Stil           | 0.008703313 | 0.415344791 |
| ENSMUSG00000033170 | Card10         | 1.46E-07    | 0.415236737 |
| ENSMUSG00000027646 | Src            | 1.77E-10    | 0.414617467 |
| ENSMUSG00000040904 | Gm21988        | 0.010486733 | 0.414426698 |
| ENSMUSG00000044134 | Fam109a        | 3.16E-06    | 0.413899888 |
| ENSMUSG00000027660 | Skil           | 1.92E-05    | 0.413620741 |
| ENSMUSG00000030067 | Foxp1          | 2.42E-05    | 0.412781908 |
| ENSMUSG00000049858 | Suox           | 0.012765342 | 0.412047488 |
| ENSMUSG00000032878 | Ccdc85a        | 1.00E-08    | 0.411516223 |
| ENSMUSG00000025823 | Pdia4          | 1.48E-13    | 0.41061233  |
| ENSMUSG00000036026 | Tmem63b        | 7.09E-10    | 0.410601595 |
| ENSMUSG00000051444 | Bbs12          | 5.29E-05    | 0.410359118 |
| ENSMUSG00000026972 | Arrdc1         | 0.009106276 | 0.40986944  |
| ENSMUSG00000089832 | Shkbp1         | 1.42E-05    | 0.409844376 |
| ENSMUSG00000039985 | Fam60a         | 2.88E-06    | 0.409687803 |
| ENSMUSG00000030688 | Stard10        | 2.69E-05    | 0.409596389 |
| ENSMUSG00000035969 | Rusc2          | 0.000950505 | 0.409412511 |
| ENSMUSG00000060477 | Irak2          | 3.72E-05    | 0.409083133 |
| ENSMUSG00000038047 | Haus6          | 0.001239408 | 0.408820502 |
| ENSMUSG00000001300 | Efnb2          | 7.32E-06    | 0.408718793 |
| ENSMUSG00000054057 | A930004D18Rik  | 0.022117191 | 0.408288256 |
| ENSMUSG00000028479 | Gne            | 0.000255835 | 0.408152094 |
| ENSMUSG00000001525 | Tubb5          | 1.47E-07    | 0.407725995 |
| ENSMUSG00000107476 | Zfp862-ps      | 0.005791223 | 0.407661852 |
| ENSMUSG00000034320 | Slc26a2        | 2.33E-05    | 0.407440984 |
| ENSMUSG00000070436 | Serpinh1       | 1.49E-07    | 0.407336932 |
| ENSMUSG00000044636 | Csrnp2         | 8.33E-06    | 0.40716175  |
| ENSMUSG00000024939 | Fam89b         | 1.85E-09    | 0.406619331 |
| ENSMUSG00000056220 | Pla2g4a        | 4.61E-10    | 0.406250333 |
| ENSMUSG00000063253 | Scoc           | 9.26E-10    | 0.406185662 |
| ENSMUSG00000066838 | Zfp772         | 0.000735646 | 0.406052908 |
| ENSMUSG00000016520 | Lnx2           | 0.00018174  | 0.405995321 |
| ENSMUSG00000020121 | Srgap1         | 4.10E-07    | 0.405907122 |
| ENSMUSG00000020250 | Txnrd1         | 2.66E-06    | 0.405904608 |
| ENSMUSG00000069893 | 9930111J21Rik1 | 0.009249475 | 0.405489452 |
| ENSMUSG00000028937 | Acot7          | 0.000195252 | 0.404859722 |
| ENSMUSG00000005447 | Pafah1b3       | 9.65E-07    | 0.403706443 |
| ENSMUSG00000041886 | Macc1          | 0.011499897 | 0.402639796 |
| ENSMUSG00000068566 | Myadm          | 6.41E-07    | 0.402165442 |
| ENSMUSG00000053070 | 9230110C19Rik  | 0.007535605 | 0.40201327  |
| ENSMUSG00000074506 | Gm10705        | 0.016145399 | 0.400725328 |
| ENSMUSG00000026836 | Acvr1          | 0.003736826 | 0.400638429 |



|                    |            |             |             |
|--------------------|------------|-------------|-------------|
| ENSMUSG00000001552 | Jup        | 0.000447019 | 0.400522041 |
| ENSMUSG00000027531 | Impa1      | 5.71E-07    | 0.400488367 |
| ENSMUSG00000040249 | Lrp1       | 8.90E-07    | 0.40045305  |
| ENSMUSG00000038473 | Nos1ap     | 6.68E-05    | 0.40014246  |
| ENSMUSG00000079547 | H2-DMb1    | 0.000503808 | 0.398804286 |
| ENSMUSG00000024012 | Mtch1      | 2.18E-12    | 0.398628247 |
| ENSMUSG00000009035 | Tmem184b   | 0.000452449 | 0.398207483 |
| ENSMUSG00000021318 | Gli3       | 2.95E-05    | 0.397996626 |
| ENSMUSG00000037300 | Ttc13      | 3.66E-09    | 0.397742049 |
| ENSMUSG00000030600 | Lrfr1      | 0.037710186 | 0.397489695 |
| ENSMUSG00000028464 | Tpm2       | 6.51E-05    | 0.397224146 |
| ENSMUSG00000027806 | Tsc22d2    | 3.12E-11    | 0.397203612 |
| ENSMUSG00000016028 | Celsr1     | 0.02572778  | 0.396924276 |
| ENSMUSG00000032855 | Pkd1       | 7.53E-06    | 0.396886071 |
| ENSMUSG00000041037 | Irgq       | 3.47E-06    | 0.3968266   |
| ENSMUSG00000021559 | Dapk1      | 0.000854773 | 0.39671615  |
| ENSMUSG00000035621 | Midn       | 3.74E-10    | 0.396341555 |
| ENSMUSG00000095041 | AC149090.1 | 2.95E-12    | 0.395441312 |
| ENSMUSG00000027712 | Anxa5      | 5.59E-09    | 0.394804549 |
| ENSMUSG00000090946 | Ccdc71l    | 1.54E-07    | 0.394325535 |
| ENSMUSG00000033356 | Pus7l      | 0.019114965 | 0.39424951  |
| ENSMUSG00000039787 | Cercam     | 0.000602198 | 0.394178957 |
| ENSMUSG00000030029 | Lrig1      | 0.000151368 | 0.394016744 |
| ENSMUSG00000032320 | Rcn2       | 5.69E-12    | 0.393889455 |
| ENSMUSG00000022528 | Hes1       | 0.005440264 | 0.393379968 |
| ENSMUSG0000004032  | Gstm5      | 1.29E-06    | 0.393332932 |
| ENSMUSG00000028949 | Smarcd3    | 0.038643667 | 0.392933887 |
| ENSMUSG00000071661 | Zbtb3      | 0.004681656 | 0.392899901 |
| ENSMUSG00000028383 | Hsdl2      | 8.89E-09    | 0.392356307 |
| ENSMUSG00000111824 | Gm47102    | 0.044618779 | 0.392030771 |
| ENSMUSG00000022415 | Syng1      | 8.59E-11    | 0.391982377 |
| ENSMUSG00000036863 | Syde2      | 1.02E-09    | 0.391644909 |
| ENSMUSG00000054364 | Rhob       | 0.017911901 | 0.391621739 |
| ENSMUSG00000074863 | Platr25    | 0.001288021 | 0.391603911 |
| ENSMUSG00000018239 | Zcchc10    | 0.000158274 | 0.390894525 |
| ENSMUSG00000031107 | Rbmx2      | 0.009474648 | 0.389780371 |
| ENSMUSG00000075470 | Deaf1      | 6.70E-11    | 0.389624743 |
| ENSMUSG00000042644 | Itpr3      | 0.010445558 | 0.38929939  |
| ENSMUSG00000038831 | Ralgps1    | 0.006541315 | 0.388556838 |
| ENSMUSG00000020205 | Phlda1     | 8.89E-08    | 0.388422313 |
| ENSMUSG00000057193 | Slc44a2    | 1.26E-11    | 0.386949566 |
| ENSMUSG00000027312 | Atrn       | 6.38E-10    | 0.386153065 |
| ENSMUSG00000043336 | Filip1l    | 1.47E-05    | 0.385651828 |
| ENSMUSG00000055725 | Paqr3      | 0.019912217 | 0.385287511 |
| ENSMUSG00000027955 | Fam198b    | 0.001408357 | 0.384895642 |
| ENSMUSG00000042292 | Mkl1       | 2.84E-08    | 0.384684026 |
| ENSMUSG00000005483 | Dnajb1     | 2.27E-10    | 0.384379472 |

|                    |               |             |             |
|--------------------|---------------|-------------|-------------|
| ENSMUSG00000036622 | Atp13a2       | 4.00E-07    | 0.384293486 |
| ENSMUSG00000025366 | Esy1          | 5.50E-06    | 0.384112547 |
| ENSMUSG00000020167 | Tcf3          | 1.88E-10    | 0.383653747 |
| ENSMUSG00000001661 | Hoxc6         | 1.02E-06    | 0.38336978  |
| ENSMUSG00000095115 | Itpr12        | 1.79E-06    | 0.382801501 |
| ENSMUSG00000037887 | Dusp8         | 0.002266591 | 0.382722275 |
| ENSMUSG00000020142 | Slc1a4        | 0.025895149 | 0.381682574 |
| ENSMUSG00000020526 | Znhit3        | 0.001907413 | 0.381628268 |
| ENSMUSG00000030878 | Cdr2          | 2.27E-05    | 0.381499141 |
| ENSMUSG00000025094 | Slc18a2       | 0.001900095 | 0.380852913 |
| ENSMUSG00000029674 | Limk1         | 0.000425324 | 0.380682795 |
| ENSMUSG00000020869 | Lrrc59        | 0.01637926  | 0.380614617 |
| ENSMUSG00000039232 | Stx11         | 0.013676541 | 0.38041807  |
| ENSMUSG00000025255 | Zfhx4         | 0.01667262  | 0.380306446 |
| ENSMUSG00000074873 | Al606181      | 0.00042597  | 0.380224372 |
| ENSMUSG00000028832 | Stmn1         | 5.88E-11    | 0.379659153 |
| ENSMUSG00000041959 | S100a10       | 0.005093848 | 0.379363453 |
| ENSMUSG00000042766 | Trim46        | 0.015899669 | 0.379272725 |
| ENSMUSG00000066647 | Gm5113        | 0.011149304 | 0.379046507 |
| ENSMUSG00000059975 | Zfp74         | 0.000850935 | 0.37902678  |
| ENSMUSG00000031483 | Erlin2        | 7.74E-07    | 0.378717647 |
| ENSMUSG00000022995 | Enah          | 0.028025062 | 0.377404177 |
| ENSMUSG00000022074 | Tnfrsf10b     | 6.98E-06    | 0.377404042 |
| ENSMUSG0000003929  | Zfp81         | 2.29E-05    | 0.377218171 |
| ENSMUSG00000045991 | Onecut2       | 0.012298454 | 0.376669609 |
| ENSMUSG00000024970 | Al846148      | 7.05E-08    | 0.376125984 |
| ENSMUSG00000029655 | N4bp2l2       | 3.29E-07    | 0.375989545 |
| ENSMUSG00000031668 | Eif2ak3       | 0.000193263 | 0.375835881 |
| ENSMUSG00000026029 | Casp8         | 1.01E-08    | 0.375349112 |
| ENSMUSG00000040097 | Flywch1       | 1.18E-08    | 0.374208958 |
| ENSMUSG00000016200 | Syt14         | 0.002559183 | 0.374114415 |
| ENSMUSG00000007817 | Zmiz1         | 0.001459359 | 0.373833141 |
| ENSMUSG00000061411 | Nol4l         | 4.70E-06    | 0.373723094 |
| ENSMUSG00000006930 | Hap1          | 0.012451561 | 0.373667188 |
| ENSMUSG00000024787 | Snx15         | 0.016132599 | 0.37329051  |
| ENSMUSG00000098404 | Mrip-ps       | 7.18E-05    | 0.373002147 |
| ENSMUSG00000025870 | Arl10         | 0.022113874 | 0.372748437 |
| ENSMUSG00000028158 | Mttp          | 0.007044377 | 0.372674063 |
| ENSMUSG00000041654 | Slc39a11      | 4.98E-05    | 0.372316208 |
| ENSMUSG00000047557 | Lxn           | 3.91E-08    | 0.372309902 |
| ENSMUSG00000018593 | Sparc         | 1.71E-07    | 0.371713787 |
| ENSMUSG00000004360 | 9330159F19Rik | 6.47E-05    | 0.371426224 |
| ENSMUSG00000029581 | Fscn1         | 1.13E-05    | 0.371290856 |
| ENSMUSG00000038042 | Ptpdc1        | 0.026834358 | 0.371174016 |
| ENSMUSG00000033278 | Ptprm         | 4.32E-07    | 0.371144093 |
| ENSMUSG00000040938 | Slc16a11      | 0.003758462 | 0.371012334 |
| ENSMUSG00000069114 | Zbtb10        | 3.75E-06    | 0.370724324 |

|                    |           |             |             |
|--------------------|-----------|-------------|-------------|
| ENSMUSG00000038888 | Ctu1      | 2.62E-05    | 0.370371164 |
| ENSMUSG00000054967 | Zfp647    | 0.012065325 | 0.369716821 |
| ENSMUSG00000015247 | Nipsnap3b | 3.06E-05    | 0.368804475 |
| ENSMUSG00000026585 | Kifap3    | 3.87E-09    | 0.368733489 |
| ENSMUSG00000063019 | Manbal    | 1.02E-08    | 0.368708019 |
| ENSMUSG00000020260 | Pofut2    | 1.22E-06    | 0.368707145 |
| ENSMUSG00000046387 | Pcdhb17   | 0.001064092 | 0.367464431 |
| ENSMUSG00000032515 | Csrnp1    | 0.000209707 | 0.367045772 |
| ENSMUSG00000024521 | Pmaip1    | 2.24E-05    | 0.36701319  |
| ENSMUSG00000057363 | Uxs1      | 0.001888706 | 0.366752006 |
| ENSMUSG00000024790 | Sac3d1    | 0.000183837 | 0.366699926 |
| ENSMUSG00000022828 | Gtf2e1    | 1.33E-05    | 0.366565207 |
| ENSMUSG00000037470 | Uggt1     | 4.96E-09    | 0.366431862 |
| ENSMUSG00000036985 | Zdhhc9    | 5.82E-07    | 0.366354762 |
| ENSMUSG00000027805 | Pfn2      | 0.000258778 | 0.366102464 |
| ENSMUSG00000078502 | Gm13212   | 0.024525067 | 0.365984284 |
| ENSMUSG0000001248  | Gramd1a   | 0.001019067 | 0.365784982 |
| ENSMUSG00000002885 | Adgre5    | 0.001440156 | 0.365674646 |
| ENSMUSG00000030245 | Golt1b    | 0.003109914 | 0.365558435 |
| ENSMUSG00000018340 | Anxa6     | 2.01E-10    | 0.365379053 |
| ENSMUSG00000019297 | Nop9      | 0.000813598 | 0.365357395 |
| ENSMUSG00000022560 | Slc52a2   | 6.09E-05    | 0.364778721 |
| ENSMUSG00000034639 | Setmar    | 0.04028445  | 0.364577738 |
| ENSMUSG00000027248 | Pdia3     | 2.01E-10    | 0.363628718 |
| ENSMUSG00000023008 | Fmnl3     | 6.10E-09    | 0.363384036 |
| ENSMUSG00000055485 | Soga1     | 0.003347452 | 0.362883852 |
| ENSMUSG00000031078 | Ctnn      | 1.70E-09    | 0.362870113 |
| ENSMUSG00000030685 | Kctd13    | 8.37E-05    | 0.362446928 |
| ENSMUSG00000056708 | Ier5      | 0.001005652 | 0.362323029 |
| ENSMUSG00000070305 | Mpzl3     | 0.005106327 | 0.362270315 |
| ENSMUSG00000008136 | Fhl2      | 5.16E-05    | 0.362147926 |
| ENSMUSG00000004637 | Wwox      | 0.018089165 | 0.361975904 |
| ENSMUSG00000066640 | Fbxl18    | 0.00088444  | 0.36191825  |
| ENSMUSG00000006526 | Tmem110   | 0.036535013 | 0.361876299 |
| ENSMUSG00000008859 | Rala      | 0.00017611  | 0.361747678 |
| ENSMUSG00000038368 | Focad     | 0.010795991 | 0.361515377 |
| ENSMUSG00000030051 | Ap1f      | 0.00042262  | 0.361155489 |
| ENSMUSG00000038991 | Txndc5    | 1.36E-09    | 0.36085242  |
| ENSMUSG00000032593 | Amigo3    | 0.042845853 | 0.36079451  |
| ENSMUSG00000009630 | Ppp2cb    | 9.10E-08    | 0.360647677 |
| ENSMUSG00000021136 | Smoc1     | 0.001615388 | 0.360625513 |
| ENSMUSG00000029185 | Fam114a1  | 0.004873517 | 0.360589372 |
| ENSMUSG00000019952 | Poc1b     | 0.027451308 | 0.360529778 |
| ENSMUSG00000029213 | Commd8    | 0.000110394 | 0.360459157 |
| ENSMUSG00000025534 | Gusb      | 1.25E-09    | 0.359984971 |
| ENSMUSG00000071203 | Naip5     | 0.009966898 | 0.35995986  |
| ENSMUSG00000025920 | Stau2     | 9.37E-06    | 0.359800585 |

|                     |               |             |             |
|---------------------|---------------|-------------|-------------|
| ENSMUSG00000035847  | Ids           | 2.91E-06    | 0.359792252 |
| ENSMUSG00000021703  | Serinc5       | 0.012065325 | 0.359777996 |
| ENSMUSG00000034574  | Daam1         | 4.55E-07    | 0.35965715  |
| ENSMUSG00000002103  | Acp2          | 0.000248108 | 0.359554679 |
| ENSMUSG00000028896  | Rcc1          | 0.006768449 | 0.358944583 |
| ENSMUSG00000048440  | Cyp4f16       | 8.84E-05    | 0.358835952 |
| ENSMUSG00000036186  | Fam69b        | 0.043280567 | 0.358798951 |
| ENSMUSG00000023805  | Synj2         | 3.87E-06    | 0.358750035 |
| ENSMUSG00000070284  | Gmppb         | 0.015527524 | 0.358579342 |
| ENSMUSG00000002732  | Fkbp7         | 1.23E-06    | 0.358305195 |
| ENSMUSG00000038497  | Tmco3         | 0.014710393 | 0.358094672 |
| ENSMUSG00000038544  | Inip          | 1.91E-05    | 0.357845193 |
| ENSMUSG00000024812  | Tjp2          | 8.26E-06    | 0.357806698 |
| ENSMUSG00000032869  | Psmf1         | 9.12E-07    | 0.357646188 |
| ENSMUSG00000032966  | Fkbp1a        | 1.65E-09    | 0.35713791  |
| ENSMUSG00000036745  | Ttl17         | 0.003080711 | 0.357015741 |
| ENSMUSG00000020828  | Pld2          | 0.001458566 | 0.356871874 |
| ENSMUSG000000053198 | Prx           | 0.000171146 | 0.356197676 |
| ENSMUSG00000102752  | Gm7694        | 0.009252015 | 0.355834795 |
| ENSMUSG00000036197  | Gxylt1        | 1.81E-07    | 0.355723431 |
| ENSMUSG00000028833  | Ncdn          | 0.004461792 | 0.355685134 |
| ENSMUSG00000027495  | Fam210b       | 0.001331227 | 0.35555268  |
| ENSMUSG00000022221  | Ripk3         | 0.008359077 | 0.355484165 |
| ENSMUSG00000047003  | Zfp41         | 0.023957898 | 0.355208939 |
| ENSMUSG00000032575  | Manf          | 0.000355953 | 0.355147067 |
| ENSMUSG00000042743  | Sgtb          | 0.014138325 | 0.354772867 |
| ENSMUSG00000057335  | Cep170        | 0.006883793 | 0.354580745 |
| ENSMUSG00000028300  | 3110043O21Rik | 3.89E-07    | 0.35388674  |
| ENSMUSG00000037432  | Fer1l5        | 0.010035939 | 0.353862888 |
| ENSMUSG00000029475  | Kdm2b         | 0.001239843 | 0.353300847 |
| ENSMUSG00000001143  | Lman2l        | 7.20E-05    | 0.353007308 |
| ENSMUSG00000090486  | BC035947      | 0.009389097 | 0.352807074 |
| ENSMUSG00000031903  | Pla2g15       | 2.05E-06    | 0.352582285 |
| ENSMUSG00000042787  | Exog          | 0.001609336 | 0.352489656 |
| ENSMUSG00000062937  | Mtap          | 0.005745762 | 0.352234927 |
| ENSMUSG00000015312  | Gadd45b       | 0.001875213 | 0.352231974 |
| ENSMUSG00000022769  | Sdf2l1        | 8.59E-07    | 0.352064055 |
| ENSMUSG00000039607  | Rbms3         | 8.97E-06    | 0.351964062 |
| ENSMUSG00000004451  | Ralb          | 7.68E-09    | 0.351559524 |
| ENSMUSG00000023947  | Nfkbie        | 0.026160093 | 0.350913463 |
| ENSMUSG00000007080  | Pole          | 0.00865791  | 0.350512705 |
| ENSMUSG00000017667  | Zfp334        | 0.00035858  | 0.350424752 |
| ENSMUSG00000050965  | Prkca         | 2.24E-05    | 0.350334004 |
| ENSMUSG00000031608  | Galnt7        | 1.06E-07    | 0.350294647 |
| ENSMUSG00000028599  | Tnfrsf1b      | 2.48E-07    | 0.350151086 |
| ENSMUSG00000031502  | Col4a1        | 0.00040882  | 0.3500761   |
| ENSMUSG00000003847  | Nfat5         | 0.020661215 | 0.349845463 |

|                    |            |             |             |
|--------------------|------------|-------------|-------------|
| ENSMUSG00000073468 | Sft2d1     | 8.46E-05    | 0.349800479 |
| ENSMUSG00000027194 | Ttc17      | 1.99E-07    | 0.349455635 |
| ENSMUSG00000049511 | Htr1b      | 0.002842329 | 0.348769229 |
| ENSMUSG00000025269 | Apex2      | 0.000841942 | 0.34871323  |
| ENSMUSG00000037426 | Depdc5     | 0.007744921 | 0.348662708 |
| ENSMUSG00000027006 | Dnajc10    | 8.54E-09    | 0.348512431 |
| ENSMUSG00000020231 | Dip2a      | 3.72E-05    | 0.348240376 |
| ENSMUSG00000015461 | Atf6b      | 0.000172475 | 0.348198728 |
| ENSMUSG00000062590 | Armc9      | 0.030813313 | 0.347979493 |
| ENSMUSG00000027803 | Wwtr1      | 1.14E-09    | 0.347730001 |
| ENSMUSG00000044700 | Tmem201    | 0.000110394 | 0.347716693 |
| ENSMUSG00000010406 | Mrpl52     | 0.042574511 | 0.347403946 |
| ENSMUSG00000056515 | Rab31      | 4.58E-05    | 0.347210119 |
| ENSMUSG00000019927 | Ube2d1     | 6.24E-08    | 0.347207626 |
| ENSMUSG00000001942 | Siae       | 0.000528811 | 0.347180499 |
| ENSMUSG00000001995 | Sipa1l2    | 1.82E-09    | 0.346730004 |
| ENSMUSG00000064193 | Gm4735     | 0.026916925 | 0.346338692 |
| ENSMUSG00000072437 | Nanos1     | 0.014334662 | 0.346199722 |
| ENSMUSG00000079685 | Ulbp1      | 0.001088855 | 0.346113561 |
| ENSMUSG00000115960 | AC147512.2 | 0.001088855 | 0.346113561 |
| ENSMUSG00000054400 | Cklf       | 0.021324283 | 0.345761965 |
| ENSMUSG00000024270 | Slc39a6    | 0.006712439 | 0.345614843 |
| ENSMUSG00000038607 | Gng10      | 7.98E-08    | 0.345549709 |
| ENSMUSG00000036819 | Jmjd4      | 0.000303738 | 0.344637104 |
| ENSMUSG00000049532 | Sall2      | 0.000133686 | 0.343974524 |
| ENSMUSG00000018412 | Kansl1     | 2.39E-06    | 0.343609942 |
| ENSMUSG00000032481 | Smarcc1    | 8.39E-08    | 0.342438519 |
| ENSMUSG00000017144 | Rnd3       | 3.06E-09    | 0.341898116 |
| ENSMUSG00000047033 | Pcdhb15    | 3.11E-06    | 0.341267751 |
| ENSMUSG00000079418 | Atg4a      | 0.02857189  | 0.341089013 |
| ENSMUSG00000116318 | AL672306.5 | 0.02857189  | 0.341089013 |
| ENSMUSG00000066357 | Wdr6       | 3.47E-09    | 0.340508528 |
| ENSMUSG00000046269 | Usp27x     | 0.00021629  | 0.340054154 |
| ENSMUSG00000028334 | Nans       | 1.67E-07    | 0.339958904 |
| ENSMUSG00000019923 | Zwint      | 3.26E-06    | 0.33979816  |
| ENSMUSG00000040669 | Phc1       | 0.00246172  | 0.339642072 |
| ENSMUSG00000022377 | Asap1      | 3.65E-08    | 0.339495497 |
| ENSMUSG00000022557 | Bop1       | 0.02976316  | 0.338986184 |
| ENSMUSG00000031904 | Slc7a6     | 4.46E-05    | 0.338687738 |
| ENSMUSG00000026879 | Gsn        | 1.16E-08    | 0.337579689 |
| ENSMUSG00000028799 | Zfp362     | 0.001119252 | 0.337501733 |
| ENSMUSG00000034761 | Map4k5     | 9.81E-08    | 0.337314457 |
| ENSMUSG00000047037 | Nipa1      | 1.00E-05    | 0.337276302 |
| ENSMUSG00000030282 | Cmas       | 2.33E-05    | 0.337249001 |
| ENSMUSG00000045045 | Lrfn4      | 9.01E-08    | 0.336600049 |
| ENSMUSG00000030225 | Dera       | 0.001579549 | 0.336275842 |
| ENSMUSG00000033653 | Vps8       | 0.014893415 | 0.335807162 |

|                    |               |             |             |
|--------------------|---------------|-------------|-------------|
| ENSMUSG00000021262 | Evl           | 6.18E-07    | 0.335117449 |
| ENSMUSG00000115027 | Vmn1r81       | 0.034256224 | 0.335043497 |
| ENSMUSG00000039953 | Clstn1        | 1.92E-08    | 0.33495057  |
| ENSMUSG00000020309 | Chac2         | 0.002375677 | 0.334807071 |
| ENSMUSG00000028228 | Cpne3         | 1.96E-05    | 0.334498865 |
| ENSMUSG00000018401 | Mtmr4         | 0.002288784 | 0.334364107 |
| ENSMUSG00000027333 | Smox          | 0.000382554 | 0.334173736 |
| ENSMUSG00000038916 | Soga3         | 0.006427775 | 0.333990259 |
| ENSMUSG00000028149 | Rap1gds1      | 1.91E-08    | 0.333926525 |
| ENSMUSG00000024269 | Tpgs2         | 0.000258635 | 0.333705769 |
| ENSMUSG00000046668 | Cxxc5         | 1.48E-07    | 0.333196236 |
| ENSMUSG00000041926 | Rnpep         | 4.38E-06    | 0.33236681  |
| ENSMUSG00000061689 | Dlgap4        | 1.89E-06    | 0.332333988 |
| ENSMUSG00000020137 | Thap2         | 0.003746003 | 0.332199964 |
| ENSMUSG00000001089 | Luzp1         | 8.21E-07    | 0.331596276 |
| ENSMUSG00000037169 | Mycn          | 0.003324143 | 0.33112009  |
| ENSMUSG00000033467 | Crlf2         | 1.59E-07    | 0.330579257 |
| ENSMUSG00000037103 | Dcaf15        | 0.027534527 | 0.33055707  |
| ENSMUSG00000020458 | Rtn4          | 7.49E-06    | 0.330471808 |
| ENSMUSG00000038552 | Fndc4         | 0.013922385 | 0.330163392 |
| ENSMUSG00000030284 | Creld1        | 4.16E-07    | 0.330156418 |
| ENSMUSG00000027327 | 1700037H04Rik | 0.000477679 | 0.329973383 |
| ENSMUSG00000045763 | Basp1         | 0.020933257 | 0.329925402 |
| ENSMUSG00000116417 | CT025619.2    | 0.001064092 | 0.329851356 |
| ENSMUSG00000053080 | 2700081O15Rik | 7.62E-06    | 0.328626513 |
| ENSMUSG00000030589 | Rasgrp4       | 0.020189107 | 0.327739937 |
| ENSMUSG00000090035 | Galnt4        | 1.25E-05    | 0.327227397 |
| ENSMUSG00000060227 | Casc4         | 2.67E-07    | 0.326696903 |
| ENSMUSG00000043702 | Pde12         | 0.000469277 | 0.326254716 |
| ENSMUSG00000116251 | Pde12         | 0.000469277 | 0.326254716 |
| ENSMUSG00000038702 | Dsel          | 0.00376787  | 0.326235418 |
| ENSMUSG00000022075 | Rhobtb2       | 0.004245518 | 0.326074073 |
| ENSMUSG00000033039 | Micall1       | 0.000678738 | 0.325730849 |
| ENSMUSG00000020964 | Sel1l         | 1.54E-07    | 0.325452946 |
| ENSMUSG00000069601 | Ank3          | 0.001708217 | 0.325256445 |
| ENSMUSG00000022964 | Tmem50b       | 0.006185038 | 0.325154798 |
| ENSMUSG00000002814 | Top3a         | 0.001405202 | 0.325145411 |
| ENSMUSG00000045827 | Serpinb9      | 1.73E-06    | 0.324704532 |
| ENSMUSG00000040661 | Rad54l2       | 0.000438596 | 0.324620485 |
| ENSMUSG00000031907 | Zfp90         | 0.000733745 | 0.32411771  |
| ENSMUSG00000103906 | Tigd5         | 0.014118485 | 0.323996274 |
| ENSMUSG00000028430 | Nol6          | 0.001576509 | 0.323857474 |
| ENSMUSG00000006095 | Tbcb          | 0.000130002 | 0.32375897  |
| ENSMUSG00000040631 | Dok4          | 0.037964921 | 0.323756718 |
| ENSMUSG00000020393 | Kremen1       | 0.002240122 | 0.323698366 |
| ENSMUSG00000026121 | Sema4c        | 0.002317068 | 0.323674396 |
| ENSMUSG00000024317 | Rnf138        | 1.03E-06    | 0.323439623 |

|                    |               |             |             |
|--------------------|---------------|-------------|-------------|
| ENSMUSG00000055652 | Klhl25        | 0.000428258 | 0.323224222 |
| ENSMUSG00000040297 | Suco          | 0.005323151 | 0.323140327 |
| ENSMUSG00000027534 | Snx16         | 0.000160899 | 0.322972884 |
| ENSMUSG00000034275 | Igsf9b        | 0.020933257 | 0.322310212 |
| ENSMUSG00000025151 | Maged1        | 1.54E-08    | 0.321903438 |
| ENSMUSG00000022474 | Pmm1          | 3.25E-06    | 0.3218707   |
| ENSMUSG00000103081 | Pcdhgb8       | 2.65E-06    | 0.321151506 |
| ENSMUSG00000079111 | Kdelr2        | 0.01010553  | 0.321125947 |
| ENSMUSG00000029616 | Erp29         | 1.41E-07    | 0.320983033 |
| ENSMUSG00000032562 | Gnai2         | 2.29E-08    | 0.320889811 |
| ENSMUSG00000029192 | Tbc1d14       | 0.000127597 | 0.3200964   |
| ENSMUSG00000021699 | Pde4d         | 0.00392748  | 0.320017708 |
| ENSMUSG00000034863 | Ano8          | 1.66E-05    | 0.319618114 |
| ENSMUSG00000032384 | Csnk1g1       | 0.000478012 | 0.319515781 |
| ENSMUSG00000020277 | Pfkl          | 1.24E-05    | 0.319399791 |
| ENSMUSG00000057637 | Prdm2         | 0.037574626 | 0.31862403  |
| ENSMUSG00000029547 | Ints1         | 0.013447535 | 0.318105698 |
| ENSMUSG00000039262 | Prrc2b        | 2.57E-05    | 0.318092725 |
| ENSMUSG00000031284 | Pak3          | 0.013945721 | 0.318047289 |
| ENSMUSG00000057346 | Apol9a        | 0.014340906 | 0.316723576 |
| ENSMUSG00000061306 | Slc38a10      | 1.25E-07    | 0.316679563 |
| ENSMUSG00000029657 | Hsph1         | 9.14E-07    | 0.316319077 |
| ENSMUSG00000035407 | Kank4         | 0.014413997 | 0.316047579 |
| ENSMUSG00000024145 | Pigf          | 0.003392055 | 0.315836735 |
| ENSMUSG00000028800 | Hdac1         | 0.000382868 | 0.315546668 |
| ENSMUSG00000026311 | Asb1          | 0.013256356 | 0.31542834  |
| ENSMUSG00000034064 | Poglut1       | 0.000263644 | 0.315167887 |
| ENSMUSG00000027777 | Schip1        | 0.007321872 | 0.315060243 |
| ENSMUSG00000052557 | Gan           | 0.000771502 | 0.315053967 |
| ENSMUSG00000047090 | Tmem198b      | 0.001634691 | 0.314964248 |
| ENSMUSG00000072762 | 4930522L14Rik | 0.004003592 | 0.314950956 |
| ENSMUSG00000039697 | Ncoa7         | 0.00332039  | 0.314263002 |
| ENSMUSG0000002458  | Rgs19         | 0.002703896 | 0.314075586 |
| ENSMUSG00000024212 | Mllt1         | 4.64E-07    | 0.313666805 |
| ENSMUSG00000054939 | Zfp174        | 0.037784513 | 0.312866866 |
| ENSMUSG00000031214 | Ophn1         | 0.001099895 | 0.312853936 |
| ENSMUSG00000060090 | Rp2           | 0.00017258  | 0.312703195 |
| ENSMUSG00000043733 | Ptpn11        | 1.93E-07    | 0.312700996 |
| ENSMUSG00000003402 | Prkcsh        | 6.23E-08    | 0.312692767 |
| ENSMUSG00000033883 | D3Ertd254e    | 0.001954354 | 0.312503645 |
| ENSMUSG00000022385 | Gtse1         | 0.014418334 | 0.312253045 |
| ENSMUSG00000020948 | Klhl28        | 0.000761062 | 0.312228867 |
| ENSMUSG00000051790 | Nlgn2         | 0.021604838 | 0.312027298 |
| ENSMUSG00000025130 | P4hb          | 1.13E-05    | 0.311793114 |
| ENSMUSG00000031503 | Col4a2        | 0.001264501 | 0.311720688 |
| ENSMUSG00000018820 | Zfyve27       | 0.00023451  | 0.311507226 |
| ENSMUSG00000034575 | Papd7         | 0.003050992 | 0.311400534 |

|                    |               |             |             |
|--------------------|---------------|-------------|-------------|
| ENSMUSG00000035529 | Prdm4         | 8.32E-05    | 0.311301844 |
| ENSMUSG00000038545 | Cul7          | 4.23E-05    | 0.311103893 |
| ENSMUSG00000030722 | Nfatc2ip      | 0.028322871 | 0.310980085 |
| ENSMUSG00000081752 | Sms-ps        | 0.027762793 | 0.310958656 |
| ENSMUSG00000014426 | Map3k4        | 1.19E-06    | 0.310805843 |
| ENSMUSG00000020802 | Ube2o         | 2.19E-05    | 0.310570673 |
| ENSMUSG00000021774 | Ube2e1        | 5.27E-05    | 0.310541802 |
| ENSMUSG00000075705 | Msrb1         | 1.99E-05    | 0.310173995 |
| ENSMUSG00000025236 | Adpgk         | 0.017999812 | 0.310058647 |
| ENSMUSG00000003814 | Calr          | 1.81E-07    | 0.310039932 |
| ENSMUSG00000028629 | Exo5          | 0.009129561 | 0.309963068 |
| ENSMUSG00000008167 | Fbxw9         | 0.000161133 | 0.309888027 |
| ENSMUSG00000037239 | Spred3        | 0.002966907 | 0.309696222 |
| ENSMUSG00000032840 | 2410131K14Rik | 0.012885198 | 0.309521068 |
| ENSMUSG00000022131 | Gpr180        | 0.000251219 | 0.309336516 |
| ENSMUSG00000003573 | Homer3        | 8.48E-06    | 0.309285074 |
| ENSMUSG00000049036 | Tmem121       | 0.034671986 | 0.308887815 |
| ENSMUSG00000028345 | Tex10         | 0.001281666 | 0.30887551  |
| ENSMUSG00000052446 | Zfp961        | 0.002046545 | 0.308639833 |
| ENSMUSG00000001657 | Hoxc8         | 9.61E-08    | 0.308586238 |
| ENSMUSG00000030104 | Edem1         | 0.000768903 | 0.308322929 |
| ENSMUSG00000047910 | Pcdhb16       | 1.21E-06    | 0.308071996 |
| ENSMUSG00000016262 | Sertad4       | 0.000865586 | 0.30806381  |
| ENSMUSG00000039483 | Asb6          | 0.001446519 | 0.307827108 |
| ENSMUSG00000021326 | Trim27        | 6.29E-07    | 0.307803673 |
| ENSMUSG00000032009 | Sesn3         | 0.013883847 | 0.307630045 |
| ENSMUSG00000035696 | Rnf38         | 0.031426929 | 0.307084675 |
| ENSMUSG00000090000 | Ier3ip1       | 0.008041881 | 0.306567045 |
| ENSMUSG00000074247 | Dda1          | 1.23E-05    | 0.306385408 |
| ENSMUSG00000069171 | Nr2f1         | 0.032109705 | 0.30603675  |
| ENSMUSG00000052949 | Rnf157        | 0.007422627 | 0.305913686 |
| ENSMUSG00000074916 | Chst14        | 0.000356212 | 0.305896735 |
| ENSMUSG00000063524 | Eno1          | 0.035575223 | 0.305878879 |
| ENSMUSG00000041779 | Tram2         | 8.33E-06    | 0.305846691 |
| ENSMUSG00000038622 | Med30         | 8.52E-05    | 0.305550077 |
| ENSMUSG00000058388 | Phtf1         | 0.01853796  | 0.305062758 |
| ENSMUSG00000054008 | Ndst1         | 1.46E-07    | 0.305048442 |
| ENSMUSG00000049728 | Zfp668        | 0.003405796 | 0.304874845 |
| ENSMUSG00000003062 | Stard3nl      | 0.002782154 | 0.304478566 |
| ENSMUSG00000041974 | Spidr         | 0.000920798 | 0.304086234 |
| ENSMUSG00000037151 | Lrrc20        | 0.001054699 | 0.303925199 |
| ENSMUSG00000070520 | Nsmce3        | 0.003504991 | 0.303897385 |
| ENSMUSG00000021203 | Otub2         | 0.047481486 | 0.303824532 |
| ENSMUSG00000064138 | Fam172a       | 0.000107901 | 0.303515462 |
| ENSMUSG00000042462 | Dctpp1        | 0.012984877 | 0.303134419 |
| ENSMUSG00000030660 | Pik3c2a       | 0.0019439   | 0.302958485 |
| ENSMUSG00000000078 | Klf6          | 0.0179489   | 0.30295616  |



|                    |               |             |             |
|--------------------|---------------|-------------|-------------|
| ENSMUSG00000018920 | Cxcl16        | 0.046682698 | 0.302521286 |
| ENSMUSG00000074886 | Grk6          | 2.37E-06    | 0.302398351 |
| ENSMUSG00000046572 | Zfp518b       | 0.000304442 | 0.302229619 |
| ENSMUSG00000006215 | Zbtb17        | 0.021540004 | 0.302086061 |
| ENSMUSG00000027889 | Ampd2         | 0.002549247 | 0.301955743 |
| ENSMUSG00000017376 | Nlk           | 0.000155694 | 0.301616931 |
| ENSMUSG00000027583 | Zbtb46        | 0.002311332 | 0.301347744 |
| ENSMUSG00000078515 | Ddi2          | 0.017582071 | 0.301183063 |
| ENSMUSG00000028468 | Rgp1          | 0.016311748 | 0.300859749 |
| ENSMUSG00000023991 | Foxp4         | 5.26E-05    | 0.30074359  |
| ENSMUSG00000116496 | AC113536.1    | 5.26E-05    | 0.30074359  |
| ENSMUSG00000027115 | Kif18a        | 0.036823775 | 0.300516742 |
| ENSMUSG00000048696 | Mex3d         | 2.42E-06    | 0.300510699 |
| ENSMUSG00000035575 | Utp6          | 0.000317518 | 0.300442811 |
| ENSMUSG00000004568 | Arhgef18      | 0.001260025 | 0.300396902 |
| ENSMUSG00000041734 | Kirrel        | 9.17E-07    | 0.300312075 |
| ENSMUSG00000035245 | Eogt          | 0.007941834 | 0.300286251 |
| ENSMUSG00000019837 | Gtf3c6        | 0.046847261 | 0.300155926 |
| ENSMUSG00000031617 | Tmem184c      | 0.000158274 | 0.29994662  |
| ENSMUSG00000009535 | Rnmt          | 3.84E-05    | 0.299695108 |
| ENSMUSG00000056952 | Tatdn2        | 3.27E-06    | 0.299620974 |
| ENSMUSG00000026036 | Nif3l1        | 0.030926984 | 0.299580193 |
| ENSMUSG00000029050 | Ski           | 0.04589643  | 0.299557394 |
| ENSMUSG00000051065 | Mb21d2        | 0.010682494 | 0.299226475 |
| ENSMUSG00000032462 | Pik3cb        | 0.001734954 | 0.298899353 |
| ENSMUSG00000051000 | Fam160a1      | 0.013708712 | 0.298862116 |
| ENSMUSG00000035133 | Arhgap5       | 5.70E-07    | 0.298200281 |
| ENSMUSG00000013698 | Pea15a        | 0.002199105 | 0.297804376 |
| ENSMUSG00000004951 | Hspb1         | 0.004313315 | 0.297778179 |
| ENSMUSG00000003549 | Erccl         | 0.031260701 | 0.297660699 |
| ENSMUSG00000045039 | Megf8         | 0.007277953 | 0.297450955 |
| ENSMUSG00000024944 | Arl2          | 3.54E-05    | 0.296845717 |
| ENSMUSG00000015759 | Cnih1         | 6.95E-05    | 0.296840408 |
| ENSMUSG00000059040 | Eno1b         | 0.025263463 | 0.296817877 |
| ENSMUSG00000032187 | Smarca4       | 3.64E-07    | 0.296454324 |
| ENSMUSG00000026466 | Tor1aip1      | 2.62E-05    | 0.295702462 |
| ENSMUSG00000050428 | Fbxo46        | 0.000461189 | 0.295695509 |
| ENSMUSG00000030062 | Rpn1          | 0.001563819 | 0.294705558 |
| ENSMUSG00000047466 | 8030462N17Rik | 0.000565542 | 0.294667132 |
| ENSMUSG00000116473 | AC102195.3    | 0.000565542 | 0.294667132 |
| ENSMUSG00000038187 | Btbd10        | 0.000604402 | 0.294542613 |
| ENSMUSG00000069631 | Strada        | 0.015960554 | 0.29410757  |
| ENSMUSG00000031684 | Slc10a7       | 0.002853685 | 0.293986734 |
| ENSMUSG00000030094 | Xpc           | 0.015084796 | 0.293708308 |
| ENSMUSG00000026411 | Tmem9         | 3.68E-05    | 0.293667563 |
| ENSMUSG00000004846 | Plod3         | 0.007972985 | 0.293156089 |
| ENSMUSG00000048578 | Mlec          | 2.04E-05    | 0.293101823 |

|                    |               |             |             |
|--------------------|---------------|-------------|-------------|
| ENSMUSG00000029014 | Dnajc2        | 0.047923266 | 0.29286287  |
| ENSMUSG00000032322 | Pstpip1       | 0.005792559 | 0.292513858 |
| ENSMUSG00000031103 | Elf4          | 2.01E-06    | 0.292167654 |
| ENSMUSG00000013275 | Slc41a1       | 0.042052204 | 0.292128411 |
| ENSMUSG00000023026 | Dip2b         | 0.02270551  | 0.29209869  |
| ENSMUSG00000014402 | Tsg101        | 8.77E-05    | 0.292077299 |
| ENSMUSG00000020326 | Ccng1         | 3.74E-07    | 0.292045128 |
| ENSMUSG00000041264 | Uspl1         | 0.011519293 | 0.292003491 |
| ENSMUSG00000027459 | Fam110a       | 0.014336886 | 0.291926549 |
| ENSMUSG00000025010 | Ccnj          | 0.005476874 | 0.291623379 |
| ENSMUSG00000039231 | Suv39h1       | 0.03235045  | 0.291294692 |
| ENSMUSG00000073197 | 5730507C01Rik | 0.028160228 | 0.291226702 |
| ENSMUSG00000034192 | Lsm3          | 0.048033101 | 0.290951891 |
| ENSMUSG00000074746 | Pdzd8         | 0.000138061 | 0.2903874   |
| ENSMUSG00000030407 | Qpctl         | 0.001163802 | 0.290353039 |
| ENSMUSG00000109324 | Prmt1         | 0.037476986 | 0.29012926  |
| ENSMUSG00000014668 | Chfr          | 3.28E-05    | 0.289865362 |
| ENSMUSG00000037750 | Fam222b       | 0.000111104 | 0.289853732 |
| ENSMUSG00000039824 | Myl6b         | 0.035735916 | 0.289811246 |
| ENSMUSG00000057069 | Ero1lb        | 0.001036752 | 0.289723953 |
| ENSMUSG00000042225 | Ammecr1       | 1.24E-05    | 0.289218348 |
| ENSMUSG00000031584 | Gsr           | 9.50E-05    | 0.289096359 |
| ENSMUSG00000040714 | Klc3          | 0.001407742 | 0.289043708 |
| ENSMUSG00000021188 | Trip11        | 0.005285661 | 0.288893342 |
| ENSMUSG00000043909 | Trp53bp1      | 0.011130447 | 0.288799798 |
| ENSMUSG00000024791 | Cdca5         | 0.00127314  | 0.288777484 |
| ENSMUSG00000039634 | Zfp189        | 0.009943736 | 0.288725107 |
| ENSMUSG00000029708 | Gcc1          | 0.016115616 | 0.288524414 |
| ENSMUSG00000053841 | Txlna         | 0.003232824 | 0.288422697 |
| ENSMUSG00000037251 | Pomk          | 0.00031943  | 0.288400209 |
| ENSMUSG00000018474 | Chd3          | 0.001026624 | 0.288378016 |
| ENSMUSG00000038954 | Supt3         | 0.016087965 | 0.288161314 |
| ENSMUSG00000022109 | Med4          | 0.030798564 | 0.287773119 |
| ENSMUSG00000032479 | Map4          | 4.32E-06    | 0.287738255 |
| ENSMUSG00000062116 | Zfp954        | 0.005232085 | 0.287720042 |
| ENSMUSG00000049580 | Tsku          | 0.011091484 | 0.28765626  |
| ENSMUSG00000035181 | Heatr5a       | 2.73E-05    | 0.287646079 |
| ENSMUSG00000039774 | Galnt12       | 0.029277896 | 0.287494466 |
| ENSMUSG00000011958 | Bnip2         | 0.000262614 | 0.287427301 |
| ENSMUSG00000039952 | Dag1          | 0.009446471 | 0.287229993 |
| ENSMUSG00000047747 | Rnf150        | 0.042431695 | 0.286891213 |
| ENSMUSG00000043940 | Wdfy3         | 0.000234203 | 0.286209908 |
| ENSMUSG00000041684 | Bivm          | 0.038294197 | 0.285504678 |
| ENSMUSG00000023938 | Aars2         | 0.044769213 | 0.285466039 |
| ENSMUSG00000024219 | Anks1         | 0.000134222 | 0.285465093 |
| ENSMUSG00000038366 | Lasp1         | 0.001976969 | 0.285443258 |
| ENSMUSG00000028164 | Manba         | 5.27E-05    | 0.285232059 |

|                    |               |             |             |
|--------------------|---------------|-------------|-------------|
| ENSMUSG00000035898 | Uba6          | 0.002677368 | 0.284919274 |
| ENSMUSG00000028988 | Ctnnbip1      | 0.019488353 | 0.284468529 |
| ENSMUSG00000021540 | Smad5         | 2.38E-05    | 0.284409599 |
| ENSMUSG00000039105 | Atp6v1g1      | 0.002053104 | 0.28439301  |
| ENSMUSG00000022305 | Lrp12         | 0.000265794 | 0.284270698 |
| ENSMUSG00000003233 | Dvl3          | 0.000457293 | 0.283993973 |
| ENSMUSG00000114547 | AC154767.1    | 0.014588219 | 0.283569821 |
| ENSMUSG00000027203 | Dut           | 0.031111931 | 0.283556388 |
| ENSMUSG00000030231 | Plekha5       | 0.044346681 | 0.283473859 |
| ENSMUSG00000037119 | Fam91a1       | 0.011488919 | 0.283221989 |
| ENSMUSG00000116351 | AC107742.3    | 0.011488919 | 0.283221989 |
| ENSMUSG00000044496 | 2510039O18Rik | 1.55E-05    | 0.28275746  |
| ENSMUSG00000039294 | BC017643      | 0.000867437 | 0.282092897 |
| ENSMUSG00000028483 | Snapc3        | 0.014380749 | 0.281864421 |
| ENSMUSG00000033705 | Stard9        | 0.046666965 | 0.28170262  |
| ENSMUSG00000008373 | Prpf31        | 0.047946479 | 0.281677414 |
| ENSMUSG00000031828 | Klhl36        | 0.020898338 | 0.281553384 |
| ENSMUSG00000048138 | Dmrt2         | 0.001593068 | 0.281409444 |
| ENSMUSG00000034194 | R3hcc1        | 0.012011925 | 0.281369918 |
| ENSMUSG00000023827 | Agpat4        | 0.014192955 | 0.280556743 |
| ENSMUSG00000045328 | Cenpe         | 0.030530495 | 0.280424522 |
| ENSMUSG00000034118 | Tpst1         | 2.47E-05    | 0.280218448 |
| ENSMUSG00000028413 | B4galt1       | 1.60E-05    | 0.280125886 |
| ENSMUSG00000027285 | Haus2         | 0.025067163 | 0.280120719 |
| ENSMUSG00000017837 | Nkiras2       | 0.000596945 | 0.280114813 |
| ENSMUSG00000022967 | Ifnar1        | 0.000158789 | 0.279853788 |
| ENSMUSG00000071477 | Zfp777        | 0.016298923 | 0.279789008 |
| ENSMUSG00000009647 | Mcu           | 0.000639545 | 0.279706346 |
| ENSMUSG00000030255 | Sspn          | 0.00054536  | 0.279679738 |
| ENSMUSG00000036435 | Exoc1         | 0.001036752 | 0.279633836 |
| ENSMUSG00000064127 | Med14         | 3.11E-06    | 0.279500077 |
| ENSMUSG00000071650 | Ganab         | 1.86E-06    | 0.279385431 |
| ENSMUSG00000022265 | Ank           | 0.001774757 | 0.27886089  |
| ENSMUSG00000014498 | Ankrd52       | 2.24E-06    | 0.278762209 |
| ENSMUSG00000020184 | Mdm2          | 0.003595004 | 0.278536148 |
| ENSMUSG00000026596 | Abl2          | 0.000347462 | 0.278496926 |
| ENSMUSG00000045780 | Olfir624      | 0.013306769 | 0.278418746 |
| ENSMUSG00000020300 | Cpeb4         | 0.017898583 | 0.278260609 |
| ENSMUSG00000092074 | Dynlt1a       | 0.003012769 | 0.27803103  |
| ENSMUSG00000027035 | Cers6         | 0.005605704 | 0.277899838 |
| ENSMUSG00000040322 | Slc25a24      | 0.043197948 | 0.277586026 |
| ENSMUSG00000035152 | Ap2b1         | 1.86E-06    | 0.27758279  |
| ENSMUSG00000024260 | Sap130        | 5.12E-05    | 0.277165101 |
| ENSMUSG00000074748 | Atxn7l3b      | 2.61E-06    | 0.276693575 |
| ENSMUSG00000025981 | Coq10b        | 0.010380462 | 0.276653929 |
| ENSMUSG00000005161 | Prdx2         | 4.73E-06    | 0.276645046 |
| ENSMUSG00000009293 | Ube2g2        | 0.001288021 | 0.276158143 |

|                    |               |             |             |
|--------------------|---------------|-------------|-------------|
| ENSMUSG00000024304 | Cdh2          | 3.11E-06    | 0.276114155 |
| ENSMUSG00000020451 | Limk2         | 0.000141191 | 0.275924858 |
| ENSMUSG00000031601 | Cnot7         | 0.001331227 | 0.275617351 |
| ENSMUSG00000001173 | Ocr1          | 0.015856902 | 0.27541792  |
| ENSMUSG00000021772 | Nkiras1       | 0.026524144 | 0.275192177 |
| ENSMUSG00000042622 | Maff          | 0.014974454 | 0.275087706 |
| ENSMUSG00000027309 | 4930402H24Rik | 0.006795689 | 0.274934866 |
| ENSMUSG00000049775 | Tmsb4x        | 3.12E-05    | 0.274791077 |
| ENSMUSG00000024604 | Rbm22         | 0.001208973 | 0.274688651 |
| ENSMUSG00000045095 | Magi1         | 0.00049208  | 0.274542041 |
| ENSMUSG00000024068 | Spast         | 2.63E-05    | 0.27453676  |
| ENSMUSG00000014778 | Fhod1         | 0.002128521 | 0.274331611 |
| ENSMUSG00000032491 | Nradd         | 7.32E-05    | 0.27398314  |
| ENSMUSG00000056648 | Hoxb8         | 0.006386216 | 0.273642764 |
| ENSMUSG00000022789 | Dnm1l         | 0.002779795 | 0.273626628 |
| ENSMUSG00000029478 | Ncor2         | 5.42E-05    | 0.273286915 |
| ENSMUSG00000024312 | Wdr46         | 0.046490757 | 0.273221163 |
| ENSMUSG00000049739 | Zfp646        | 3.71E-05    | 0.27266533  |
| ENSMUSG00000030397 | Mark4         | 9.45E-05    | 0.272594635 |
| ENSMUSG00000026223 | Itm2c         | 0.015660155 | 0.272371655 |
| ENSMUSG00000026944 | Abca2         | 0.025331874 | 0.272263789 |
| ENSMUSG00000023868 | Pde10a        | 0.005912048 | 0.272208624 |
| ENSMUSG00000031799 | Tpm4          | 0.03753545  | 0.271936915 |
| ENSMUSG00000030471 | Zdhhc13       | 0.002590331 | 0.271821854 |
| ENSMUSG00000007617 | Homer1        | 0.005275268 | 0.271594421 |
| ENSMUSG00000036591 | Arhgap21      | 0.004540112 | 0.271233446 |
| ENSMUSG00000002733 | Plekha3       | 2.94E-05    | 0.271086326 |
| ENSMUSG00000032312 | Csk           | 0.003092395 | 0.270837739 |
| ENSMUSG00000031681 | Smad1         | 0.001612412 | 0.270823131 |
| ENSMUSG00000029229 | Chic2         | 0.000163014 | 0.270744199 |
| ENSMUSG00000021392 | Nol8          | 0.013701994 | 0.270706676 |
| ENSMUSG00000034544 | Rsrc1         | 0.000144227 | 0.270603939 |
| ENSMUSG00000028414 | Fktn          | 4.68E-05    | 0.270600902 |
| ENSMUSG00000038172 | Ttc39b        | 0.015538645 | 0.270527644 |
| ENSMUSG00000043154 | Ppp2r3a       | 0.03013437  | 0.270513491 |
| ENSMUSG00000031529 | Tnks          | 9.30E-05    | 0.27043505  |
| ENSMUSG00000078453 | Abracl        | 0.005722793 | 0.270188319 |
| ENSMUSG00000046982 | Tshz1         | 0.00095539  | 0.270126876 |
| ENSMUSG00000021096 | Ppm1a         | 8.75E-06    | 0.269755876 |
| ENSMUSG00000058013 | 11-Sep        | 0.00055937  | 0.269698363 |
| ENSMUSG00000035078 | Mtmr9         | 0.000355626 | 0.269401559 |
| ENSMUSG00000026915 | Strbp         | 7.43E-05    | 0.269201747 |
| ENSMUSG00000007837 | Prrg2         | 0.007116277 | 0.268895813 |
| ENSMUSG00000006931 | P3h4          | 8.28E-06    | 0.268892941 |
| ENSMUSG00000010067 | Rassf1        | 0.000179718 | 0.268763627 |
| ENSMUSG00000051306 | Usp42         | 0.03003739  | 0.268262993 |
| ENSMUSG00000026047 | Kdelc1        | 0.000304298 | 0.268255299 |

|                    |               |             |             |
|--------------------|---------------|-------------|-------------|
| ENSMUSG00000045071 | E130308A19Rik | 0.037754498 | 0.268030081 |
| ENSMUSG00000020522 | Mfap3         | 0.000134222 | 0.267887972 |
| ENSMUSG00000020841 | Cpd           | 0.003809991 | 0.267706522 |
| ENSMUSG00000026308 | Klhl30        | 0.035811806 | 0.2675307   |
| ENSMUSG00000027490 | E2f1          | 9.96E-05    | 0.267470735 |
| ENSMUSG00000027550 | Lrrcc1        | 0.004679334 | 0.267328384 |
| ENSMUSG00000018363 | Smurf2        | 0.000562231 | 0.267154252 |
| ENSMUSG00000035671 | Zswim4        | 0.004025004 | 0.267027371 |
| ENSMUSG00000042613 | Pbxip1        | 0.043666092 | 0.266941158 |
| ENSMUSG00000052656 | Rnf103        | 0.014112281 | 0.266596663 |
| ENSMUSG00000008475 | Arpc5         | 5.73E-06    | 0.26646416  |
| ENSMUSG00000033222 | Ttf2          | 0.003241132 | 0.266138498 |
| ENSMUSG00000079260 | Tmppe         | 0.013055056 | 0.265840221 |
| ENSMUSG00000020288 | Ahsa2         | 0.000900162 | 0.265834538 |
| ENSMUSG00000026484 | Rnf2          | 0.005827855 | 0.265323142 |
| ENSMUSG00000019461 | Plscr3        | 1.43E-05    | 0.264838605 |
| ENSMUSG00000061273 | Mmgt1         | 0.000206629 | 0.264723279 |
| ENSMUSG00000034509 | Mad2l1bp      | 0.006827988 | 0.264649609 |
| ENSMUSG00000030020 | Prickle2      | 0.011842905 | 0.264595479 |
| ENSMUSG00000041040 | Fam117b       | 0.026227896 | 0.264359785 |
| ENSMUSG00000032103 | Pus3          | 0.017834466 | 0.264327289 |
| ENSMUSG00000039244 | E130309D02Rik | 0.000409049 | 0.2639217   |
| ENSMUSG00000054115 | Skp2          | 0.004592985 | 0.263785788 |
| ENSMUSG00000050714 | Zbtb26        | 0.005294557 | 0.2632251   |
| ENSMUSG00000025228 | Actr1a        | 7.21E-06    | 0.263066418 |
| ENSMUSG00000025002 | Cyp2c55       | 0.040421482 | 0.263018204 |
| ENSMUSG00000007783 | Cpt1c         | 0.006722949 | 0.262840551 |
| ENSMUSG00000020015 | Cdk17         | 0.003443256 | 0.26277572  |
| ENSMUSG00000027257 | Paccin3       | 0.036115543 | 0.262610467 |
| ENSMUSG00000026848 | Tor1b         | 0.00020395  | 0.262474436 |
| ENSMUSG00000071064 | Zfp827        | 0.000622736 | 0.262372855 |
| ENSMUSG00000040563 | Plppr2        | 0.00449369  | 0.262164052 |
| ENSMUSG00000016831 | Tox4          | 0.04792175  | 0.261999105 |
| ENSMUSG00000026667 | Uhmk1         | 9.29E-06    | 0.261645654 |
| ENSMUSG00000062762 | Ei24          | 0.014812138 | 0.260676171 |
| ENSMUSG00000001482 | Def8          | 0.012045282 | 0.260635511 |
| ENSMUSG00000020571 | Pdia6         | 7.04E-06    | 0.260305028 |
| ENSMUSG00000028207 | Asph          | 0.000128673 | 0.26016388  |
| ENSMUSG00000042590 | lpo11         | 0.000418813 | 0.260132755 |
| ENSMUSG00000026701 | Prdx6         | 0.017999646 | 0.260129553 |
| ENSMUSG00000059263 | Usp47         | 9.77E-06    | 0.259341439 |
| ENSMUSG00000032285 | Dnaja4        | 0.017995759 | 0.259151329 |
| ENSMUSG00000020044 | Timp3         | 0.00028512  | 0.25893959  |
| ENSMUSG00000038780 | Smurf1        | 0.017064285 | 0.258767715 |
| ENSMUSG00000037017 | Zscan21       | 0.004171966 | 0.258493511 |
| ENSMUSG00000048720 | Tbc1d12       | 0.000315983 | 0.257956357 |
| ENSMUSG00000030400 | Erc2          | 0.039428202 | 0.25757068  |

|                    |          |             |             |
|--------------------|----------|-------------|-------------|
| ENSMUSG00000033964 | Zbtb41   | 0.000504688 | 0.257273852 |
| ENSMUSG00000021357 | Exoc2    | 0.000373903 | 0.256972978 |
| ENSMUSG00000052752 | Traf7    | 0.000904362 | 0.256693732 |
| ENSMUSG00000024943 | Smc5     | 0.000270241 | 0.256521335 |
| ENSMUSG00000036403 | Cep135   | 0.004919336 | 0.256124715 |
| ENSMUSG00000022476 | Polr3h   | 0.008830916 | 0.255833055 |
| ENSMUSG00000016541 | Atxn10   | 1.68E-05    | 0.255591365 |
| ENSMUSG00000040945 | Rcc2     | 0.005553677 | 0.255359883 |
| ENSMUSG00000019777 | Hdac2    | 3.58E-05    | 0.255232312 |
| ENSMUSG00000000149 | Gna12    | 1.95E-05    | 0.254723238 |
| ENSMUSG00000034974 | Dapk3    | 0.000456974 | 0.254592914 |
| ENSMUSG00000039987 | Phtf2    | 0.003637709 | 0.25420478  |
| ENSMUSG00000048799 | Cep120   | 0.00010216  | 0.253437405 |
| ENSMUSG00000029394 | Cdk2ap1  | 0.035261657 | 0.253221283 |
| ENSMUSG00000060510 | Zfp266   | 0.024585291 | 0.253162127 |
| ENSMUSG00000064367 | mt-Nd5   | 0.000426746 | 0.25300327  |
| ENSMUSG00000038740 | Mvb12b   | 0.013256356 | 0.252919434 |
| ENSMUSG00000020536 | Llg1     | 3.79E-05    | 0.252804152 |
| ENSMUSG00000060032 | H2afj    | 0.004784626 | 0.252691082 |
| ENSMUSG00000064302 | Clasp1   | 0.000173016 | 0.252036629 |
| ENSMUSG00000029863 | Casp2    | 0.0169282   | 0.25201453  |
| ENSMUSG00000020368 | Canx     | 2.11E-05    | 0.251759023 |
| ENSMUSG00000020541 | Tom1l1   | 0.004298199 | 0.251696203 |
| ENSMUSG00000001729 | Akt1     | 0.002189353 | 0.251462231 |
| ENSMUSG00000053253 | Ndfip2   | 0.001793468 | 0.251181404 |
| ENSMUSG00000090150 | Acad11   | 0.048969345 | 0.251077429 |
| ENSMUSG00000024127 | Prepl    | 0.02113886  | 0.250956158 |
| ENSMUSG00000001052 | Sec24b   | 0.00427672  | 0.250474674 |
| ENSMUSG00000038335 | Tsr1     | 0.009294378 | 0.250456934 |
| ENSMUSG00000030199 | Etv6     | 0.012300275 | 0.250443536 |
| ENSMUSG00000022052 | Ppp2r2a  | 0.000399275 | 0.250361216 |
| ENSMUSG00000038372 | Gmds     | 0.015579451 | 0.250183415 |
| ENSMUSG00000020160 | Meis1    | 0.016107868 | 0.249999132 |
| ENSMUSG00000026499 | Acbd3    | 0.002782879 | 0.24968102  |
| ENSMUSG00000019487 | Trip10   | 0.008412172 | 0.249595668 |
| ENSMUSG00000024160 | Spsb3    | 0.035614822 | 0.249266964 |
| ENSMUSG00000027351 | Spred1   | 2.93E-05    | 0.249097874 |
| ENSMUSG00000052928 | Ctif     | 0.000633321 | 0.249093646 |
| ENSMUSG00000015478 | Rnf5     | 0.002128521 | 0.248711327 |
| ENSMUSG00000025577 | Cbx2     | 0.01176805  | 0.24854338  |
| ENSMUSG0000002504  | Slc9a3r2 | 0.000431498 | 0.248088355 |
| ENSMUSG00000039201 | Tbc1d25  | 0.01132803  | 0.248000488 |
| ENSMUSG00000039536 | Stau1    | 8.22E-05    | 0.247711616 |
| ENSMUSG00000032435 | Dync1li1 | 0.003467054 | 0.247095495 |
| ENSMUSG00000047648 | Fbxo30   | 0.000626473 | 0.246934837 |
| ENSMUSG00000039828 | Wdr70    | 0.007516608 | 0.246794128 |
| ENSMUSG00000033014 | Trim33   | 0.001695496 | 0.246716743 |

|                    |            |             |             |
|--------------------|------------|-------------|-------------|
| ENSMUSG00000051978 | Erich1     | 0.006291927 | 0.246655764 |
| ENSMUSG00000022191 | Drosha     | 0.002382591 | 0.246639786 |
| ENSMUSG00000035401 | Emsy       | 0.00998086  | 0.246605786 |
| ENSMUSG00000028538 | St3gal3    | 0.016909375 | 0.246268018 |
| ENSMUSG00000024594 | Prrc1      | 0.011102187 | 0.245656142 |
| ENSMUSG00000024074 | Crim1      | 0.003397915 | 0.245511485 |
| ENSMUSG00000028016 | Ints12     | 0.001863053 | 0.245506637 |
| ENSMUSG00000020659 | Cbll1      | 0.004110439 | 0.245451122 |
| ENSMUSG00000031527 | Eri1       | 0.00248184  | 0.245353695 |
| ENSMUSG00000065947 | mt-Nd4l    | 0.003527029 | 0.245154095 |
| ENSMUSG00000027552 | E2f5       | 0.023004342 | 0.245000586 |
| ENSMUSG00000054793 | Cadm4      | 0.015435135 | 0.244974257 |
| ENSMUSG00000078908 | Mon1b      | 0.00038675  | 0.244910833 |
| ENSMUSG00000025757 | Hspa4l     | 0.025263463 | 0.24440334  |
| ENSMUSG00000115951 | AC146980.1 | 0.025263463 | 0.24440334  |
| ENSMUSG00000082082 | Gm13230    | 0.006701599 | 0.244012162 |
| ENSMUSG00000032570 | Atp2c1     | 0.002669614 | 0.243857088 |
| ENSMUSG00000071180 | Smim15     | 0.000956873 | 0.243721834 |
| ENSMUSG00000024472 | Dcp2       | 0.044951065 | 0.24363626  |
| ENSMUSG00000000085 | Scmh1      | 0.020943777 | 0.243209479 |
| ENSMUSG00000036167 | Pphln1     | 0.001467519 | 0.243198849 |
| ENSMUSG00000033983 | Coil       | 0.025783001 | 0.242987624 |
| ENSMUSG00000024878 | Cbwd1      | 0.003925802 | 0.242563189 |
| ENSMUSG00000074221 | Zfp568     | 0.011598276 | 0.242562359 |
| ENSMUSG00000002329 | Mdp1       | 0.003843689 | 0.242507951 |
| ENSMUSG00000014748 | Tex261     | 0.000248882 | 0.242241587 |
| ENSMUSG00000003458 | Ncstn      | 4.93E-05    | 0.24217419  |
| ENSMUSG00000007987 | lft22      | 0.03013437  | 0.241983961 |
| ENSMUSG00000027522 | Stx16      | 0.01359366  | 0.241829667 |
| ENSMUSG00000050989 | Selenon    | 0.000796651 | 0.241623431 |
| ENSMUSG00000020844 | Nxn        | 0.000130496 | 0.241510965 |
| ENSMUSG00000061607 | Mdc1       | 0.043905156 | 0.241140007 |
| ENSMUSG00000019889 | Ptprk      | 0.002610415 | 0.241120693 |
| ENSMUSG00000049421 | Zfp260     | 0.013422263 | 0.240931006 |
| ENSMUSG00000032939 | Nup93      | 0.000903712 | 0.240896024 |
| ENSMUSG0000002658  | Gtf2f1     | 0.009070322 | 0.24085397  |
| ENSMUSG00000037933 | Bicd2      | 0.004018833 | 0.240528922 |
| ENSMUSG00000026974 | Zmynd19    | 0.001283678 | 0.240345571 |
| ENSMUSG00000022136 | Dnajc3     | 6.51E-05    | 0.239945579 |
| ENSMUSG00000020868 | Xylt2      | 0.045929912 | 0.239927857 |
| ENSMUSG00000034201 | Gas2l1     | 0.00022591  | 0.239845    |
| ENSMUSG00000039509 | Nup133     | 0.027642984 | 0.23974827  |
| ENSMUSG00000007476 | Lrrc8a     | 0.000282179 | 0.23957349  |
| ENSMUSG00000040850 | Psme4      | 0.003083285 | 0.239393497 |
| ENSMUSG00000023147 | Wrb        | 0.031585005 | 0.238986084 |
| ENSMUSG00000021959 | Lats2      | 0.001259063 | 0.23889056  |
| ENSMUSG00000056612 | Ppp1r14b   | 0.000928536 | 0.23851727  |

|                    |               |             |             |
|--------------------|---------------|-------------|-------------|
| ENSMUSG00000028381 | Ugcg          | 0.021303971 | 0.238514594 |
| ENSMUSG00000032058 | Ppp2r1b       | 0.000641557 | 0.238207268 |
| ENSMUSG00000028173 | Wls           | 9.96E-05    | 0.237771567 |
| ENSMUSG00000071856 | Mcc           | 0.004557602 | 0.236717143 |
| ENSMUSG00000034880 | Mrpl34        | 0.00071372  | 0.236635639 |
| ENSMUSG00000039234 | Sec24d        | 0.01800656  | 0.236602734 |
| ENSMUSG00000054604 | Cggbp1        | 0.000816297 | 0.236442542 |
| ENSMUSG00000063889 | Crem          | 0.026999703 | 0.236312171 |
| ENSMUSG00000020134 | Peli1         | 0.000304106 | 0.236094808 |
| ENSMUSG00000039046 | Usp6nl        | 0.003253466 | 0.236073686 |
| ENSMUSG00000017210 | Med24         | 0.021071364 | 0.235937424 |
| ENSMUSG00000038416 | Cdc16         | 0.001246346 | 0.235863853 |
| ENSMUSG00000022095 | Fam160b2      | 0.008317302 | 0.235420788 |
| ENSMUSG00000043895 | S1pr2         | 0.01789565  | 0.235297627 |
| ENSMUSG00000025871 | 4833439L19Rik | 0.000479621 | 0.235186966 |
| ENSMUSG00000027315 | Spint1        | 0.000139516 | 0.235181848 |
| ENSMUSG00000022533 | Atp13a3       | 0.001183486 | 0.234931623 |
| ENSMUSG00000014867 | Surf4         | 0.003925802 | 0.234890003 |
| ENSMUSG00000036333 | Kidins220     | 0.00054884  | 0.234661675 |
| ENSMUSG00000025041 | Nt5c2         | 0.000369947 | 0.234588244 |
| ENSMUSG00000039770 | Ypel5         | 0.000150815 | 0.234568949 |
| ENSMUSG00000004394 | Tmed4         | 0.000481672 | 0.234458131 |
| ENSMUSG00000019818 | Cd164         | 0.005121517 | 0.234303375 |
| ENSMUSG00000061950 | Ppp4r1        | 0.004032975 | 0.233449883 |
| ENSMUSG00000017721 | Pigt          | 0.000117777 | 0.23341876  |
| ENSMUSG00000027695 | Pld1          | 0.037754498 | 0.233155433 |
| ENSMUSG00000021910 | Nisch         | 0.000580738 | 0.232891138 |
| ENSMUSG00000005533 | Igf1r         | 0.002633653 | 0.232854786 |
| ENSMUSG00000058672 | Tubb2a        | 0.000323772 | 0.23270989  |
| ENSMUSG00000015869 | Prpsap1       | 0.00264634  | 0.232619055 |
| ENSMUSG00000038387 | Rras          | 0.01505835  | 0.232558609 |
| ENSMUSG00000025203 | Scd2          | 0.049325843 | 0.232544917 |
| ENSMUSG00000025821 | Zfp282        | 0.00319673  | 0.232462173 |
| ENSMUSG00000040462 | Os9           | 0.002652027 | 0.232358492 |
| ENSMUSG00000019338 | Zfp687        | 0.012988594 | 0.232325395 |
| ENSMUSG00000020305 | Asb3          | 0.008924255 | 0.2313312   |
| ENSMUSG00000030718 | Ppme1         | 0.003027373 | 0.231252791 |
| ENSMUSG00000051343 | Rab11fip5     | 0.01689526  | 0.231144554 |
| ENSMUSG00000026150 | Mff           | 0.000608695 | 0.230807672 |
| ENSMUSG00000036275 | 9530068E07Rik | 0.000120407 | 0.230555962 |
| ENSMUSG00000026219 | Trip12        | 0.001638187 | 0.230544751 |
| ENSMUSG00000015932 | Dstn          | 0.000284459 | 0.230513549 |
| ENSMUSG00000022391 | Rangap1       | 0.003847988 | 0.230455248 |
| ENSMUSG00000019826 | Zbtb24        | 0.001761902 | 0.230393575 |
| ENSMUSG00000005417 | Mprip         | 0.000229717 | 0.230074707 |
| ENSMUSG00000021177 | Tdp1          | 0.049858398 | 0.230016876 |
| ENSMUSG00000074305 | Peak1         | 0.001869542 | 0.229967249 |



|                    |               |             |             |
|--------------------|---------------|-------------|-------------|
| ENSMUSG00000032171 | Pin1          | 0.000452449 | 0.229713723 |
| ENSMUSG00000037351 | Actr1b        | 0.018230556 | 0.229709094 |
| ENSMUSG00000002249 | Tead3         | 0.00113771  | 0.22968649  |
| ENSMUSG00000039568 | Ubald1        | 0.030135142 | 0.229468906 |
| ENSMUSG00000024900 | Cpt1a         | 0.012429874 | 0.229462547 |
| ENSMUSG00000068220 | Lgals1        | 0.001725048 | 0.229300654 |
| ENSMUSG00000042595 | Fam199x       | 0.003109914 | 0.229114528 |
| ENSMUSG00000024807 | Syvn1         | 0.000493529 | 0.228709611 |
| ENSMUSG00000041891 | Lman1         | 0.006922315 | 0.228667079 |
| ENSMUSG00000051412 | Vamp7         | 0.00016964  | 0.22860877  |
| ENSMUSG00000035086 | Becn1         | 0.001527327 | 0.228506884 |
| ENSMUSG00000042688 | Mapk6         | 0.018182063 | 0.227548767 |
| ENSMUSG00000022035 | Ccdc25        | 0.005323151 | 0.227544634 |
| ENSMUSG00000036934 | 4921524J17Rik | 0.033074732 | 0.22749408  |
| ENSMUSG00000020397 | Med7          | 0.007914417 | 0.227491455 |
| ENSMUSG00000019087 | Atp6ap1       | 0.000141191 | 0.227412302 |
| ENSMUSG00000032777 | Gtf3c1        | 0.000972594 | 0.227311622 |
| ENSMUSG00000056050 | Mia3          | 0.001844677 | 0.227219988 |
| ENSMUSG00000038280 | Ostm1         | 0.000438109 | 0.227091572 |
| ENSMUSG00000023452 | Pisd          | 0.00113236  | 0.2268261   |
| ENSMUSG00000066880 | Zfp617        | 0.012964493 | 0.226664227 |
| ENSMUSG00000059689 | Zfp637        | 0.009822625 | 0.226573999 |
| ENSMUSG00000036620 | Mgat4b        | 0.001356024 | 0.226568451 |
| ENSMUSG00000037035 | Inhbb         | 0.000196461 | 0.226270089 |
| ENSMUSG00000040648 | Ppip5k2       | 0.002779581 | 0.226111848 |
| ENSMUSG00000027198 | Ext2          | 0.000464146 | 0.226069206 |
| ENSMUSG00000034931 | Dhx8          | 0.031643967 | 0.225602303 |
| ENSMUSG00000000738 | Spg7          | 0.009974926 | 0.225543128 |
| ENSMUSG00000028274 | Rngtt         | 0.006144069 | 0.225448452 |
| ENSMUSG00000040423 | Rc3h1         | 0.021159711 | 0.225030293 |
| ENSMUSG00000040841 | Six5          | 0.039752457 | 0.224986762 |
| ENSMUSG00000034457 | Eda2r         | 0.004003592 | 0.224981963 |
| ENSMUSG00000028032 | Papss1        | 0.007975703 | 0.224779987 |
| ENSMUSG00000091264 | Smim13        | 0.022792203 | 0.224667875 |
| ENSMUSG00000053094 | Tmem248       | 0.003340706 | 0.224590489 |
| ENSMUSG00000028411 | Aptx          | 0.013487954 | 0.22453116  |
| ENSMUSG00000005566 | Trim28        | 0.005771818 | 0.224398555 |
| ENSMUSG00000026229 | Psm1          | 0.009406671 | 0.224196148 |
| ENSMUSG00000037474 | Dtl           | 0.013422263 | 0.224157088 |
| ENSMUSG00000021549 | Rasa1         | 0.004158832 | 0.224155742 |
| ENSMUSG00000018659 | Pnpo          | 0.007891106 | 0.224002132 |
| ENSMUSG00000039230 | Tbcd          | 0.001459359 | 0.223780243 |
| ENSMUSG00000029064 | Gnb1          | 0.000429271 | 0.223755268 |
| ENSMUSG00000032553 | Srprb         | 0.018981554 | 0.223748778 |
| ENSMUSG00000040151 | Hs2st1        | 0.033163961 | 0.223496599 |
| ENSMUSG00000005225 | Plekha8       | 0.048217971 | 0.223397589 |
| ENSMUSG00000027287 | Snap23        | 0.0130238   | 0.223109308 |

|                     |          |             |             |
|---------------------|----------|-------------|-------------|
| ENSMUSG00000031433  | Rbm41    | 0.03748878  | 0.222928621 |
| ENSMUSG00000037029  | Zfp146   | 0.040780429 | 0.22292371  |
| ENSMUSG00000002741  | Ykt6     | 0.017895437 | 0.22288756  |
| ENSMUSG000000031737 | Irx5     | 0.00400602  | 0.222870997 |
| ENSMUSG00000027852  | Nras     | 0.018896031 | 0.222863907 |
| ENSMUSG00000004127  | Trmt10a  | 0.04198939  | 0.222316827 |
| ENSMUSG00000001655  | Hoxc13   | 0.01682864  | 0.22225405  |
| ENSMUSG00000022175  | Lrp10    | 0.002898423 | 0.222239398 |
| ENSMUSG00000021131  | Erh      | 0.00952948  | 0.22204834  |
| ENSMUSG00000062115  | Rai1     | 0.000923439 | 0.221929784 |
| ENSMUSG000000039130 | Zc3hc1   | 0.037160594 | 0.221874766 |
| ENSMUSG000000035212 | Leprot   | 0.004643192 | 0.221755291 |
| ENSMUSG000000049562 | Ap5b1    | 0.018348139 | 0.221393752 |
| ENSMUSG00000002428  | Hltf     | 0.002491374 | 0.221092935 |
| ENSMUSG00000026942  | Traf2    | 0.007163843 | 0.221054919 |
| ENSMUSG00000028431  | lkbkap   | 0.044769213 | 0.220535044 |
| ENSMUSG00000038417  | Fig4     | 0.000989277 | 0.220495144 |
| ENSMUSG000000038957 | Ecd3     | 0.00390529  | 0.220416201 |
| ENSMUSG000000035569 | Ankrd11  | 0.000297165 | 0.220266958 |
| ENSMUSG000000005078 | Jkamp    | 0.027744085 | 0.220206491 |
| ENSMUSG00000021782  | Dlg5     | 0.039118212 | 0.219994777 |
| ENSMUSG000000033446 | Lpar6    | 0.04802501  | 0.219987997 |
| ENSMUSG00000028948  | Nol9     | 0.043244446 | 0.219893052 |
| ENSMUSG00000028251  | Tstd3    | 0.016181988 | 0.218768545 |
| ENSMUSG000000019854 | Reps1    | 0.006620112 | 0.218719689 |
| ENSMUSG000000114797 | Nupl1    | 0.022371789 | 0.218678179 |
| ENSMUSG00000026421  | Csrp1    | 0.001296913 | 0.218661429 |
| ENSMUSG00000020114  | Cand1    | 0.017192472 | 0.218511416 |
| ENSMUSG00000003865  | Gys1     | 0.023647543 | 0.217959201 |
| ENSMUSG000000043067 | Dpy19l1  | 0.001142769 | 0.217598575 |
| ENSMUSG00000029392  | Rilpl1   | 0.031448876 | 0.217375766 |
| ENSMUSG000000091900 | Gm4353   | 0.020351492 | 0.217311173 |
| ENSMUSG00000026239  | Pde6d    | 0.009122481 | 0.21692986  |
| ENSMUSG000000034024 | Cct2     | 0.000261288 | 0.21680245  |
| ENSMUSG000000034390 | Cmip     | 0.002470326 | 0.216664238 |
| ENSMUSG00000029635  | Cdk8     | 0.004700107 | 0.216518782 |
| ENSMUSG000000037784 | Dzip1l   | 0.010261943 | 0.216460064 |
| ENSMUSG00000022329  | Stk3     | 0.002046545 | 0.215698179 |
| ENSMUSG000000039347 | Atp6v0e2 | 0.004889999 | 0.2156295   |
| ENSMUSG000000031545 | Gpat4    | 0.022042125 | 0.215449065 |
| ENSMUSG000000037204 | Atg101   | 0.018185686 | 0.215347053 |
| ENSMUSG000000048920 | Fkrp     | 0.003665711 | 0.215038127 |
| ENSMUSG00000022307  | Oxr1     | 0.01356998  | 0.214990778 |
| ENSMUSG000000056537 | Rlim     | 0.000461923 | 0.21485498  |
| ENSMUSG00000021598  | Med10    | 0.005403161 | 0.214762539 |
| ENSMUSG000000073079 | Srp54    | 0.002690195 | 0.214636289 |
| ENSMUSG00000024947  | Men1     | 0.004879069 | 0.214387355 |

|                     |          |             |             |
|---------------------|----------|-------------|-------------|
| ENSMUSG00000106695  | Men1     | 0.004879069 | 0.214387355 |
| ENSMUSG00000015837  | Sqstm1   | 0.006570939 | 0.214347437 |
| ENSMUSG00000051934  | Spats2   | 0.00949293  | 0.214301601 |
| ENSMUSG00000027361  | Gabpb1   | 0.006869353 | 0.214217541 |
| ENSMUSG00000020232  | Hmg20b   | 0.0065036   | 0.214037902 |
| ENSMUSG00000041763  | Tpp2     | 0.001956451 | 0.213727361 |
| ENSMUSG00000036948  | BC037034 | 0.012026169 | 0.213710916 |
| ENSMUSG00000064368  | mt-Nd6   | 0.000761062 | 0.213517925 |
| ENSMUSG00000033684  | Qsox1    | 0.004769519 | 0.213116663 |
| ENSMUSG00000020806  | Rhbdf2   | 0.024678032 | 0.212960283 |
| ENSMUSG00000014601  | Strip1   | 0.003749641 | 0.212924296 |
| ENSMUSG00000041360  | Pum3     | 0.03059466  | 0.211897282 |
| ENSMUSG00000022772  | Senp5    | 0.010348796 | 0.211794339 |
| ENSMUSG00000034254  | Agpat1   | 0.001893494 | 0.211614492 |
| ENSMUSG00000029148  | Nrbp1    | 0.001449346 | 0.211481008 |
| ENSMUSG00000032477  | Cdc25a   | 0.037279732 | 0.211155983 |
| ENSMUSG00000046556  | Zfp319   | 0.002881206 | 0.211059868 |
| ENSMUSG00000035403  | Crb2     | 0.002086021 | 0.210907806 |
| ENSMUSG00000031703  | Itfg1    | 0.000556071 | 0.210400774 |
| ENSMUSG00000030327  | Necap1   | 0.016221163 | 0.210249316 |
| ENSMUSG00000029147  | Ppm1g    | 0.001167855 | 0.210174296 |
| ENSMUSG00000027642  | Rpn2     | 0.001414256 | 0.209971718 |
| ENSMUSG00000003070  | Efna2    | 0.018956222 | 0.209931608 |
| ENSMUSG00000021253  | Tgfb3    | 0.017999646 | 0.209843632 |
| ENSMUSG00000025209  | Twink    | 0.011581565 | 0.209776082 |
| ENSMUSG00000050079  | Rspry1   | 0.008848066 | 0.208947695 |
| ENSMUSG00000028837  | Psmb2    | 0.001438453 | 0.208698077 |
| ENSMUSG00000003955  | Fam162a  | 0.003027373 | 0.208373431 |
| ENSMUSG00000030704  | Rab6a    | 0.000622814 | 0.208032391 |
| ENSMUSG000000095677 | Dynlt1f  | 0.002782879 | 0.207993712 |
| ENSMUSG00000019467  | Arhgef25 | 0.042984504 | 0.207880603 |
| ENSMUSG00000062825  | Actg1    | 0.005087106 | 0.207685506 |
| ENSMUSG00000050397  | Foxl2    | 0.003519723 | 0.207667614 |
| ENSMUSG00000029203  | Ube2k    | 0.001381202 | 0.207574554 |
| ENSMUSG00000021693  | Kif2a    | 0.005672739 | 0.20754037  |
| ENSMUSG00000047766  | Lrrc49   | 0.037754498 | 0.207454633 |
| ENSMUSG00000031728  | Zfp821   | 0.026556805 | 0.20737868  |
| ENSMUSG00000064363  | mt-Nd4   | 0.007030903 | 0.207377386 |
| ENSMUSG00000022951  | Rcan1    | 0.037754498 | 0.207285177 |
| ENSMUSG00000026857  | Ntmt1    | 0.011712467 | 0.207207542 |
| ENSMUSG00000034659  | Tmem109  | 0.005670934 | 0.207193186 |
| ENSMUSG00000068039  | Tcp1     | 0.001361393 | 0.207103408 |
| ENSMUSG00000029599  | Ddx54    | 0.001219015 | 0.206777317 |
| ENSMUSG00000038170  | Pde4dip  | 0.003688299 | 0.206581736 |
| ENSMUSG00000032366  | Tpm1     | 0.001524639 | 0.206360792 |
| ENSMUSG00000030870  | Ubfd1    | 0.02815837  | 0.2062177   |
| ENSMUSG00000028944  | Prkag2   | 0.03429085  | 0.205720709 |

|                    |               |             |             |
|--------------------|---------------|-------------|-------------|
| ENSMUSG00000020736 | Nt5c          | 0.004129296 | 0.205651935 |
| ENSMUSG00000015749 | Anp32e        | 0.009506544 | 0.205595681 |
| ENSMUSG00000027963 | Extl2         | 0.012787138 | 0.20545076  |
| ENSMUSG00000023942 | Slc29a1       | 0.044951065 | 0.205335557 |
| ENSMUSG00000030172 | Erc1          | 0.007321261 | 0.204941469 |
| ENSMUSG00000071652 | Ints5         | 0.002777693 | 0.204878429 |
| ENSMUSG00000063160 | Numbl         | 0.017298042 | 0.204720112 |
| ENSMUSG00000041164 | Zmiz2         | 0.0013776   | 0.204649781 |
| ENSMUSG00000047714 | Ppp1r2        | 0.043679651 | 0.204626141 |
| ENSMUSG00000042901 | Aida          | 0.027100218 | 0.204614867 |
| ENSMUSG00000000378 | Ccm2          | 0.004202563 | 0.204514046 |
| ENSMUSG00000045868 | Gvin1         | 0.018488857 | 0.20435363  |
| ENSMUSG00000038034 | Igsf8         | 0.003367021 | 0.204063683 |
| ENSMUSG00000029338 | Antxr2        | 0.001218382 | 0.204038457 |
| ENSMUSG00000039960 | Rhou          | 0.012790874 | 0.203791258 |
| ENSMUSG00000032557 | Uba5          | 0.004399673 | 0.203789425 |
| ENSMUSG00000018965 | Ywhah         | 0.039512553 | 0.203639791 |
| ENSMUSG00000038658 | Ric1          | 0.008941993 | 0.203477933 |
| ENSMUSG00000000605 | Clcn4         | 0.001619304 | 0.203331547 |
| ENSMUSG00000041135 | Ripk2         | 0.003161203 | 0.203162393 |
| ENSMUSG00000026867 | Gapvd1        | 0.003906373 | 0.203090041 |
| ENSMUSG00000034075 | Zdhhc5        | 0.016184602 | 0.203063456 |
| ENSMUSG00000039043 | Arpin         | 0.043172828 | 0.202802235 |
| ENSMUSG00000021975 | Ints9         | 0.031585005 | 0.202720206 |
| ENSMUSG00000026240 | Cops7b        | 0.021457868 | 0.202709361 |
| ENSMUSG00000056204 | Pgpep1        | 0.040194352 | 0.202683066 |
| ENSMUSG00000071645 | Tut1          | 0.009233604 | 0.202631087 |
| ENSMUSG00000033585 | Ndn           | 0.004992349 | 0.202490742 |
| ENSMUSG00000027080 | Med19         | 0.013402135 | 0.202253684 |
| ENSMUSG00000019984 | Med23         | 0.02774061  | 0.202191487 |
| ENSMUSG0000001924  | Uba1          | 0.000841183 | 0.202018971 |
| ENSMUSG00000000420 | Galnt1        | 0.003338249 | 0.201937732 |
| ENSMUSG00000033557 | Fam20b        | 0.002369008 | 0.201803699 |
| ENSMUSG00000032409 | Atr           | 0.046361405 | 0.201710963 |
| ENSMUSG00000039704 | Lmbrd2        | 0.015611811 | 0.201356591 |
| ENSMUSG00000034601 | 2700049A03Rik | 0.032339362 | 0.201297741 |
| ENSMUSG00000024660 | Incenp        | 0.018420927 | 0.201265676 |
| ENSMUSG00000033855 | Ston1         | 0.003929322 | 0.201136164 |
| ENSMUSG00000022684 | Bfar          | 0.042447064 | 0.200986327 |
| ENSMUSG00000041415 | Dicer1        | 0.013415412 | 0.199970649 |
| ENSMUSG00000030319 | Cand2         | 0.011914503 | 0.199745847 |
| ENSMUSG00000032423 | Syncrip       | 0.006166949 | 0.199111402 |
| ENSMUSG00000050310 | Rictor        | 0.015638718 | 0.198589137 |
| ENSMUSG00000064370 | mt-Cytb       | 0.015941284 | 0.198468949 |
| ENSMUSG0000001774  | Chordc1       | 0.025783001 | 0.198247735 |
| ENSMUSG00000009470 | Tnpo1         | 0.001646084 | 0.198038327 |
| ENSMUSG00000034333 | Zbed4         | 0.037658056 | 0.197890704 |

|                    |          |             |             |
|--------------------|----------|-------------|-------------|
| ENSMUSG00000025730 | Rab40c   | 0.04653143  | 0.197161983 |
| ENSMUSG00000036299 | BC031181 | 0.001716567 | 0.196863982 |
| ENSMUSG00000030291 | Med21    | 0.023210779 | 0.1968197   |
| ENSMUSG00000030180 | Kdm5a    | 0.015205234 | 0.196635776 |
| ENSMUSG00000027828 | Ssr3     | 0.007088293 | 0.196482019 |
| ENSMUSG00000027714 | Exosc9   | 0.046091882 | 0.196139827 |
| ENSMUSG00000037949 | Ano10    | 0.009885287 | 0.195845944 |
| ENSMUSG00000031807 | Pgls     | 0.004908293 | 0.195488975 |
| ENSMUSG00000018209 | Stk4     | 0.020942513 | 0.195343045 |
| ENSMUSG00000051185 | Fam174a  | 0.00858598  | 0.195320558 |
| ENSMUSG00000006169 | Clint1   | 0.001575388 | 0.194755625 |
| ENSMUSG00000078652 | Psme3    | 0.006503816 | 0.194740395 |
| ENSMUSG00000025178 | Pi4k2a   | 0.00469958  | 0.194303579 |
| ENSMUSG00000039835 | Nhs1     | 0.015551395 | 0.194055184 |
| ENSMUSG00000034674 | Tdg      | 0.041654251 | 0.193978364 |
| ENSMUSG00000050555 | Hyls1    | 0.0439297   | 0.193964129 |
| ENSMUSG00000024007 | Ppil1    | 0.020665212 | 0.193919309 |
| ENSMUSG00000031622 | Sin3b    | 0.0044157   | 0.193807279 |
| ENSMUSG00000051413 | Plagl2   | 0.026082444 | 0.193784344 |
| ENSMUSG00000026116 | Tmem131  | 0.04080335  | 0.193731876 |
| ENSMUSG00000050846 | Zfp623   | 0.024850705 | 0.193725352 |
| ENSMUSG00000031826 | Usp10    | 0.042716627 | 0.193507657 |
| ENSMUSG00000019158 | Tmem160  | 0.006390944 | 0.193439295 |
| ENSMUSG00000027893 | Ahcyl1   | 0.012764549 | 0.193143285 |
| ENSMUSG00000069495 | Epc2     | 0.026117896 | 0.192746607 |
| ENSMUSG0000003269  | Cyth2    | 0.004202563 | 0.192401848 |
| ENSMUSG00000048668 | Rhno1    | 0.017178616 | 0.192061553 |
| ENSMUSG00000076432 | Ywhaq    | 0.002235069 | 0.192000366 |
| ENSMUSG00000029066 | Mrpl20   | 0.016250811 | 0.191933411 |
| ENSMUSG00000029486 | Mrpl1    | 0.048449027 | 0.19181278  |
| ENSMUSG0000003421  | Nosip    | 0.034263017 | 0.191708802 |
| ENSMUSG00000010461 | Eya4     | 0.033765064 | 0.191417794 |
| ENSMUSG00000022634 | Yaf2     | 0.004689055 | 0.191029461 |
| ENSMUSG00000032602 | Slc25a20 | 0.025192083 | 0.190947544 |
| ENSMUSG00000035764 | Fbxo45   | 0.031662931 | 0.190940125 |
| ENSMUSG00000041570 | Camsap2  | 0.00473093  | 0.190578632 |
| ENSMUSG00000019975 | Ikkip    | 0.008794977 | 0.190452227 |
| ENSMUSG00000057982 | Zfp809   | 0.026916925 | 0.190149855 |
| ENSMUSG00000064356 | mt-Atp8  | 0.035634645 | 0.189924653 |
| ENSMUSG00000031781 | Ciapi1   | 0.020058241 | 0.189568878 |
| ENSMUSG00000063760 | Rnf217   | 0.014787204 | 0.189309094 |
| ENSMUSG00000026553 | Copa     | 0.001966377 | 0.188954312 |
| ENSMUSG00000059552 | Trp53    | 0.002710583 | 0.188469895 |
| ENSMUSG00000037013 | Ss18     | 0.023853692 | 0.188267286 |
| ENSMUSG00000020173 | Cobl     | 0.026818648 | 0.188242736 |
| ENSMUSG00000034165 | Ccnd3    | 0.009935579 | 0.188229749 |
| ENSMUSG00000029621 | Arpc1a   | 0.004965116 | 0.18820561  |

|                    |            |             |             |
|--------------------|------------|-------------|-------------|
| ENSMUSG00000011752 | Pgam1      | 0.017894476 | 0.187902486 |
| ENSMUSG00000049300 | Prmt6      | 0.032735177 | 0.187806038 |
| ENSMUSG00000037674 | Rfx7       | 0.014435691 | 0.18772869  |
| ENSMUSG00000040158 | Tax1bp3    | 0.008284813 | 0.187566077 |
| ENSMUSG00000038456 | Dennd2a    | 0.007808045 | 0.187409176 |
| ENSMUSG00000024393 | Prrc2a     | 0.007478922 | 0.186932428 |
| ENSMUSG00000049288 | Lix1l      | 0.041903941 | 0.186751128 |
| ENSMUSG00000035954 | Dock4      | 0.04653143  | 0.186361235 |
| ENSMUSG00000007880 | Arid1a     | 0.006908059 | 0.186323181 |
| ENSMUSG00000022142 | Nup155     | 0.049259314 | 0.186164909 |
| ENSMUSG00000018398 | 08-Sep     | 0.008166289 | 0.18608966  |
| ENSMUSG00000020918 | Kat2a      | 0.045257106 | 0.185997848 |
| ENSMUSG00000093989 | Rnasek     | 0.003868533 | 0.185216153 |
| ENSMUSG00000044026 | Slc35g1    | 0.043175814 | 0.184587481 |
| ENSMUSG00000026074 | Map4k4     | 0.003832539 | 0.184502424 |
| ENSMUSG00000022412 | Mief1      | 0.034472896 | 0.184450071 |
| ENSMUSG00000021022 | Ppp2r3c    | 0.039989302 | 0.184325849 |
| ENSMUSG00000029405 | G3bp2      | 0.002885394 | 0.183991269 |
| ENSMUSG00000032328 | Tmem30a    | 0.002809383 | 0.183971597 |
| ENSMUSG00000063576 | Klhdc3     | 0.007045238 | 0.183870125 |
| ENSMUSG00000021725 | Parp8      | 0.007653063 | 0.183149984 |
| ENSMUSG00000068747 | Sort1      | 0.043079631 | 0.182698988 |
| ENSMUSG00000030120 | Mlf2       | 0.003086333 | 0.182551502 |
| ENSMUSG00000049792 | Bag5       | 0.020004292 | 0.182390737 |
| ENSMUSG00000014959 | Gorasp2    | 0.022546734 | 0.182269887 |
| ENSMUSG00000059995 | Atxn7l3    | 0.004739375 | 0.182134577 |
| ENSMUSG00000026810 | Dpm2       | 0.046123816 | 0.182123355 |
| ENSMUSG00000015335 | Zdhhc12    | 0.04300947  | 0.182046953 |
| ENSMUSG00000033295 | Ptprf      | 0.040168247 | 0.181882584 |
| ENSMUSG00000027663 | Zmat3      | 0.005026878 | 0.181731409 |
| ENSMUSG00000026751 | Nr5a1      | 0.004172147 | 0.181697453 |
| ENSMUSG00000022270 | Fam134b    | 0.042097244 | 0.181285842 |
| ENSMUSG00000073563 | Csnk1g3    | 0.005454775 | 0.181204008 |
| ENSMUSG00000049516 | Spty2d1    | 0.041654251 | 0.181202034 |
| ENSMUSG00000034462 | Pkd2       | 0.004221547 | 0.180856329 |
| ENSMUSG00000022193 | Psmb5      | 0.012429874 | 0.179854119 |
| ENSMUSG00000044709 | Gemin7     | 0.013252154 | 0.179588305 |
| ENSMUSG00000033444 | Specc1l    | 0.007306596 | 0.179538688 |
| ENSMUSG00000016619 | Nup50      | 0.013434959 | 0.179406365 |
| ENSMUSG00000021711 | Trappc13   | 0.004796044 | 0.179372844 |
| ENSMUSG00000071660 | Ttc9c      | 0.022792203 | 0.17852072  |
| ENSMUSG00000023048 | Prr13      | 0.013256356 | 0.178513892 |
| ENSMUSG00000005899 | Smpd4      | 0.042606298 | 0.178435179 |
| ENSMUSG00000004099 | Dnmt1      | 0.037361124 | 0.178258421 |
| ENSMUSG00000029110 | Rnf4       | 0.011333845 | 0.178050021 |
| ENSMUSG00000097715 | Gpr137b-ps | 0.049561765 | 0.177371248 |
| ENSMUSG00000068732 | Tmem167b   | 0.008199852 | 0.177311988 |

|                    |         |             |             |
|--------------------|---------|-------------|-------------|
| ENSMUSG00000026705 | Klhl20  | 0.014684251 | 0.177248377 |
| ENSMUSG00000019433 | Gipc1   | 0.04673071  | 0.177061697 |
| ENSMUSG00000024251 | Thada   | 0.022428591 | 0.177016633 |
| ENSMUSG00000031422 | Morf4l2 | 0.008015256 | 0.176683527 |
| ENSMUSG00000015937 | H2afy   | 0.007035218 | 0.176426219 |
| ENSMUSG00000024622 | Hmgxb3  | 0.01106035  | 0.176231307 |
| ENSMUSG00000035530 | Eif1    | 0.005099814 | 0.175984735 |
| ENSMUSG00000036632 | Alg5    | 0.0110183   | 0.175886293 |
| ENSMUSG00000038502 | Ptov1   | 0.012192037 | 0.175869168 |
| ENSMUSG00000021501 | Cam1    | 0.034125242 | 0.175847357 |
| ENSMUSG00000024913 | Lrp5    | 0.005133244 | 0.175527278 |
| ENSMUSG00000020716 | Nf1     | 0.036166773 | 0.175407974 |
| ENSMUSG00000038604 | Ripor1  | 0.005377504 | 0.175346614 |
| ENSMUSG00000024725 | Ostf1   | 0.034362173 | 0.174705602 |
| ENSMUSG00000032112 | Trappc4 | 0.018287762 | 0.174188626 |
| ENSMUSG00000022514 | Il1rap  | 0.036215819 | 0.173888526 |
| ENSMUSG00000028849 | Map7d1  | 0.009538447 | 0.173728137 |
| ENSMUSG00000025971 | Maip1   | 0.048217971 | 0.173234176 |
| ENSMUSG00000020935 | Dcakd   | 0.0137311   | 0.173227125 |
| ENSMUSG00000024241 | Sos1    | 0.007618223 | 0.173017807 |
| ENSMUSG0000002233  | Rhoc    | 0.029239163 | 0.172812568 |
| ENSMUSG00000032324 | Tspan3  | 0.00612253  | 0.172688755 |
| ENSMUSG00000064358 | mt-Co3  | 0.041571302 | 0.172232937 |
| ENSMUSG00000019188 | H13     | 0.031171988 | 0.171220262 |
| ENSMUSG00000026426 | Arl8a   | 0.017999812 | 0.170865864 |
| ENSMUSG00000057738 | Sptan1  | 0.008354357 | 0.170783001 |
| ENSMUSG00000038894 | Irs2    | 0.024962356 | 0.170613833 |
| ENSMUSG00000024603 | Dctn4   | 0.015380862 | 0.170282953 |
| ENSMUSG00000036686 | Cc2d1a  | 0.049639854 | 0.169363104 |
| ENSMUSG00000025512 | Chid1   | 0.021550316 | 0.169318681 |
| ENSMUSG00000024909 | Efemp2  | 0.00949293  | 0.168958786 |
| ENSMUSG00000024580 | Grpel2  | 0.048020524 | 0.168920242 |
| ENSMUSG00000038615 | Nfe2l1  | 0.036336083 | 0.168343363 |
| ENSMUSG00000034088 | Hdlbp   | 0.024022357 | 0.167899901 |
| ENSMUSG00000042502 | Cd2bp2  | 0.031752505 | 0.167872366 |
| ENSMUSG00000022200 | Golph3  | 0.007956187 | 0.167163902 |
| ENSMUSG00000064357 | mt-Atp6 | 0.040637574 | 0.167024616 |
| ENSMUSG00000048040 | Arxes2  | 0.026650292 | 0.166686289 |
| ENSMUSG00000018921 | Pelp1   | 0.043425279 | 0.166241065 |
| ENSMUSG00000019731 | Slc35e1 | 0.048612208 | 0.16613502  |
| ENSMUSG00000027349 | Fam98b  | 0.016688315 | 0.165799925 |
| ENSMUSG00000028048 | Gba     | 0.010725335 | 0.165729388 |
| ENSMUSG00000027091 | Zc3h15  | 0.034122893 | 0.165699052 |
| ENSMUSG00000016344 | Ppdpf   | 0.048242814 | 0.165691523 |
| ENSMUSG00000030126 | Tmcc1   | 0.041520214 | 0.165647573 |
| ENSMUSG00000032097 | Ddx6    | 0.009064734 | 0.16534162  |
| ENSMUSG00000048661 | Lemd3   | 0.034125242 | 0.164336696 |

|                    |         |             |             |
|--------------------|---------|-------------|-------------|
| ENSMUSG00000021395 | Spin1   | 0.029844833 | 0.163497306 |
| ENSMUSG00000026097 | Ormdl1  | 0.042494836 | 0.162862241 |
| ENSMUSG00000085666 | Gm9855  | 0.042054683 | 0.162815604 |
| ENSMUSG00000038525 | Armc10  | 0.03322138  | 0.162678146 |
| ENSMUSG00000037416 | Dmxl1   | 0.02270551  | 0.162521301 |
| ENSMUSG00000045983 | Eif4g1  | 0.034923784 | 0.16245225  |
| ENSMUSG00000025451 | Paip1   | 0.013041041 | 0.162405775 |
| ENSMUSG00000063281 | Zfp35   | 0.045022816 | 0.162143691 |
| ENSMUSG00000033565 | Rbfox2  | 0.027632864 | 0.161671791 |
| ENSMUSG00000005034 | Prkacb  | 0.020310892 | 0.161666704 |
| ENSMUSG00000031691 | Tnpo2   | 0.013883847 | 0.161657324 |
| ENSMUSG00000033417 | Cacul1  | 0.012979932 | 0.161646877 |
| ENSMUSG00000017670 | Elmo2   | 0.048902124 | 0.160765354 |
| ENSMUSG00000025337 | Sbds    | 0.040763876 | 0.160241127 |
| ENSMUSG00000026187 | Xrcc5   | 0.028112852 | 0.159827145 |
| ENSMUSG00000018286 | Psemb6  | 0.040327081 | 0.15947849  |
| ENSMUSG00000047921 | Trappc9 | 0.038751996 | 0.159372802 |
| ENSMUSG00000005320 | Tead1   | 0.021620523 | 0.158959096 |
| ENSMUSG00000031365 | Zfp275  | 0.044162131 | 0.158919277 |
| ENSMUSG00000036676 | Tmtc3   | 0.048538086 | 0.157953437 |
| ENSMUSG00000021893 | Capn7   | 0.0436872   | 0.157668906 |
| ENSMUSG00000047264 | Zfp358  | 0.047987204 | 0.157596823 |
| ENSMUSG00000026155 | Smap1   | 0.027269323 | 0.15628633  |
| ENSMUSG00000079562 | Maea    | 0.03951892  | 0.1557692   |
| ENSMUSG00000024335 | Brd2    | 0.018438381 | 0.155231626 |
| ENSMUSG00000038002 | Cramp1l | 0.03810703  | 0.15487727  |
| ENSMUSG00000015575 | Atp6v0e | 0.023273018 | 0.154416804 |
| ENSMUSG00000028382 | Ptbp3   | 0.034362173 | 0.15408612  |
| ENSMUSG00000030890 | Ilk     | 0.042300793 | 0.153780495 |
| ENSMUSG00000025104 | Hdgfl3  | 0.02436869  | 0.153468327 |
| ENSMUSG00000036180 | Gatad2a | 0.038982493 | 0.152777263 |
| ENSMUSG00000005610 | Eif4g2  | 0.016284552 | 0.152577683 |
| ENSMUSG00000001056 | Nhp2    | 0.028029233 | 0.152002365 |
| ENSMUSG00000030410 | Dmwd    | 0.042425003 | 0.151666796 |
| ENSMUSG00000014907 | Naf1    | 0.038635977 | 0.151397376 |
| ENSMUSG00000013419 | Zfp651  | 0.044362442 | 0.150798362 |
| ENSMUSG00000005103 | Wdr1    | 0.019412258 | 0.15060746  |
| ENSMUSG00000063904 | Dpp3    | 0.019709525 | 0.150136276 |
| ENSMUSG00000009555 | Cdk9    | 0.048876694 | 0.150046909 |
| ENSMUSG00000049940 | Pgrmc2  | 0.021872233 | 0.149710287 |
| ENSMUSG00000018547 | Pip4k2b | 0.049149472 | 0.149418517 |
| ENSMUSG00000024614 | Tmx3    | 0.02229146  | 0.1493778   |
| ENSMUSG00000031954 | Cfdp1   | 0.024560253 | 0.148925377 |
| ENSMUSG00000038250 | Usp38   | 0.048002172 | 0.14854941  |
| ENSMUSG00000021877 | Arf4    | 0.026834358 | 0.148382335 |
| ENSMUSG00000115861 | Arf4    | 0.026834358 | 0.148382335 |
| ENSMUSG00000022280 | Rnf19a  | 0.034125242 | 0.147895626 |



|                     |               |             |              |
|---------------------|---------------|-------------|--------------|
| ENSMUSG00000037993  | Dhx38         | 0.040507749 | 0.147352794  |
| ENSMUSG00000002768  | Mea1          | 0.048938848 | 0.147006519  |
| ENSMUSG00000004319  | Clcn3         | 0.043828604 | 0.146910514  |
| ENSMUSG000000041879 | Ipo9          | 0.049259314 | 0.146208237  |
| ENSMUSG00000019471  | Cdc37         | 0.026556805 | 0.145248548  |
| ENSMUSG000000041278 | Ttc1          | 0.048689445 | 0.145218269  |
| ENSMUSG00000021665  | Hexb          | 0.023644781 | 0.144726667  |
| ENSMUSG000000074781 | Ube2n         | 0.038593214 | 0.144098491  |
| ENSMUSG000000031835 | Mbtps1        | 0.048938848 | 0.143320022  |
| ENSMUSG00000017615  | Tnfaip1       | 0.028160228 | 0.142580656  |
| ENSMUSG000000024048 | Myl12a        | 0.032759037 | 0.142433371  |
| ENSMUSG00000028436  | Dcaf12        | 0.043097435 | 0.14191324   |
| ENSMUSG000000032437 | Stt3b         | 0.028723649 | 0.141607578  |
| ENSMUSG000000034101 | Ctnnd1        | 0.048393854 | 0.14110888   |
| ENSMUSG000000068856 | Sf3b4         | 0.045613448 | 0.140316361  |
| ENSMUSG000000052681 | Rap1b         | 0.03093382  | 0.139583373  |
| ENSMUSG00000027247  | Arhgap1       | 0.048468567 | 0.139519316  |
| ENSMUSG000000032803 | Cdv3          | 0.036632354 | 0.139436585  |
| ENSMUSG00000015755  | Tab2          | 0.042007243 | 0.139223584  |
| ENSMUSG000000005312 | Ubqln1        | 0.032029841 | 0.138820143  |
| ENSMUSG000000031068 | Glrx3         | 0.043679651 | 0.138620817  |
| ENSMUSG000000045767 | B230219D22Rik | 0.033765064 | 0.137611379  |
| ENSMUSG000000031532 | Saraf         | 0.032443691 | 0.137607307  |
| ENSMUSG00000021270  | Hsp90aa1      | 0.041700663 | 0.137280265  |
| ENSMUSG000000000001 | Gnai3         | 0.037476986 | 0.136766123  |
| ENSMUSG00000025410  | Dctn2         | 0.041654251 | 0.136164085  |
| ENSMUSG00000027475  | Kif3b         | 0.042071054 | 0.136113692  |
| ENSMUSG000000051223 | Bzw1          | 0.039475012 | 0.134449502  |
| ENSMUSG000000050565 | Tor1aip2      | 0.044579656 | 0.134248689  |
| ENSMUSG000000038910 | Plcl2         | 0.043779368 | 0.133945781  |
| ENSMUSG000000034424 | Gcsh          | 0.042985488 | 0.133636558  |
| ENSMUSG000000008393 | Carhsp1       | 0.042426307 | 0.13294723   |
| ENSMUSG00000021497  | Txndc15       | 0.048996296 | 0.132424217  |
| ENSMUSG000000051391 | Ywhag         | 0.04325358  | 0.131294759  |
| ENSMUSG00000028757  | Ddost         | 0.049464208 | 0.129989472  |
| ENSMUSG00000022390  | Zc3h7b        | 0.049858398 | 0.128719022  |
| ENSMUSG00000024527  | Afg3l2        | 0.045668393 | -0.133994082 |
| ENSMUSG00000029247  | Paics         | 0.042426307 | -0.134215022 |
| ENSMUSG00000021917  | Spcs1         | 0.048876694 | -0.134293777 |
| ENSMUSG00000028234  | Rps20         | 0.049076619 | -0.134806899 |
| ENSMUSG00000025508  | Rplp2         | 0.039512553 | -0.135021397 |
| ENSMUSG000000050299 | Gm9843        | 0.045257106 | -0.135463214 |
| ENSMUSG00000030876  | Mettl9        | 0.040168247 | -0.136483923 |
| ENSMUSG000000095597 | Gm6472        | 0.037356829 | -0.137437395 |
| ENSMUSG00000001507  | Itga3         | 0.034042819 | -0.138631869 |
| ENSMUSG00000030847  | Bag3          | 0.034176689 | -0.139001008 |
| ENSMUSG00000003518  | Dusp3         | 0.039002087 | -0.1396126   |

|                    |          |             |              |
|--------------------|----------|-------------|--------------|
| ENSMUSG00000071528 | Usmg5    | 0.034125242 | -0.139632473 |
| ENSMUSG00000040725 | Hnrnpul1 | 0.029213402 | -0.139943843 |
| ENSMUSG00000083061 | Gm12191  | 0.032735177 | -0.141088878 |
| ENSMUSG00000050148 | Ubqln2   | 0.031401614 | -0.141224847 |
| ENSMUSG00000026618 | lars2    | 0.040480103 | -0.141697275 |
| ENSMUSG00000018559 | Ctdnep1  | 0.049136565 | -0.141726145 |
| ENSMUSG00000020402 | Vdac1    | 0.029730503 | -0.142967412 |
| ENSMUSG00000079614 | Seh1l    | 0.032987016 | -0.14306921  |
| ENSMUSG00000036781 | Rps27l   | 0.024836036 | -0.144052084 |
| ENSMUSG00000060636 | Rpl35a   | 0.043660219 | -0.144190689 |
| ENSMUSG00000050144 | Slc25a44 | 0.037344418 | -0.144541813 |
| ENSMUSG00000039615 | Stub1    | 0.030314278 | -0.14457708  |
| ENSMUSG00000041736 | Tspo     | 0.026687794 | -0.144594677 |
| ENSMUSG00000010663 | Fads1    | 0.030845493 | -0.145164228 |
| ENSMUSG00000043991 | Pura     | 0.035268936 | -0.145529988 |
| ENSMUSG00000049550 | Clip1    | 0.038698505 | -0.145834098 |
| ENSMUSG00000024259 | Slc25a46 | 0.03134941  | -0.146240163 |
| ENSMUSG00000024431 | Nr3c1    | 0.032080318 | -0.146664412 |
| ENSMUSG00000025283 | Sat1     | 0.023258757 | -0.146689249 |
| ENSMUSG00000020460 | Rps27a   | 0.025483379 | -0.147219498 |
| ENSMUSG00000026032 | Ndufb3   | 0.034961043 | -0.147579205 |
| ENSMUSG00000039001 | Rps21    | 0.022289825 | -0.147702968 |
| ENSMUSG00000054808 | Actn4    | 0.026117896 | -0.150091389 |
| ENSMUSG00000021556 | Golm1    | 0.027385483 | -0.150454004 |
| ENSMUSG00000057036 | Gm7536   | 0.018357005 | -0.151372215 |
| ENSMUSG00000063696 | Gm8730   | 0.021883439 | -0.151427868 |
| ENSMUSG00000020225 | Tmbim4   | 0.035996805 | -0.151869749 |
| ENSMUSG00000030894 | Tpp1     | 0.043317748 | -0.152330653 |
| ENSMUSG00000022337 | Emc2     | 0.034657362 | -0.152518165 |
| ENSMUSG00000067274 | Rplp0    | 0.025001196 | -0.152917591 |
| ENSMUSG00000052310 | Slc39a1  | 0.016008479 | -0.15325391  |
| ENSMUSG00000024026 | Glo1     | 0.023978182 | -0.153437263 |
| ENSMUSG00000024234 | Mtpap    | 0.049453697 | -0.154283756 |
| ENSMUSG00000030335 | Mrpl51   | 0.034961043 | -0.154575541 |
| ENSMUSG00000054942 | Miga1    | 0.024553997 | -0.154596328 |
| ENSMUSG00000051695 | Pcbp1    | 0.017451179 | -0.154826999 |
| ENSMUSG00000006599 | Gtf2h1   | 0.034173782 | -0.155165037 |
| ENSMUSG00000090258 | Churc1   | 0.04932637  | -0.155496967 |
| ENSMUSG00000040857 | Erf      | 0.037754498 | -0.155578029 |
| ENSMUSG00000025858 | Get4     | 0.03892243  | -0.155696577 |
| ENSMUSG00000026112 | Coa5     | 0.016443496 | -0.155756624 |
| ENSMUSG00000027122 | Arl14ep  | 0.044104269 | -0.155840825 |
| ENSMUSG00000033159 | Cnppd1   | 0.03497397  | -0.156200946 |
| ENSMUSG00000041058 | Wwp1     | 0.020933257 | -0.156547661 |
| ENSMUSG00000027611 | Procr    | 0.022780149 | -0.156784986 |
| ENSMUSG00000113061 | Gm11361  | 0.014460407 | -0.157080076 |
| ENSMUSG00000079508 | Apoo     | 0.048938848 | -0.157367197 |

|                    |               |             |              |
|--------------------|---------------|-------------|--------------|
| ENSMUSG00000028249 | Sdcbp         | 0.014644987 | -0.1578338   |
| ENSMUSG00000045128 | Rpl18a        | 0.020789786 | -0.15791204  |
| ENSMUSG00000053436 | Mapk14        | 0.023311578 | -0.157971464 |
| ENSMUSG00000057672 | Pkn1          | 0.041271011 | -0.158218104 |
| ENSMUSG00000038467 | Chmp4b        | 0.013145008 | -0.159361022 |
| ENSMUSG00000039616 | Mocos         | 0.041857253 | -0.159410798 |
| ENSMUSG00000039771 | Polr2j        | 0.037679193 | -0.159445267 |
| ENSMUSG00000091512 | Lamtor3       | 0.017560984 | -0.159850694 |
| ENSMUSG00000063457 | Rps15         | 0.014145481 | -0.160492416 |
| ENSMUSG00000027523 | Gnas          | 0.020543331 | -0.161775576 |
| ENSMUSG00000027881 | Prpf38b       | 0.02857189  | -0.161952769 |
| ENSMUSG00000025878 | Uimc1         | 0.046881736 | -0.162466132 |
| ENSMUSG00000025477 | Inpp5a        | 0.011659482 | -0.163551661 |
| ENSMUSG00000020719 | Ddx5          | 0.009389097 | -0.163643191 |
| ENSMUSG00000034892 | Rps29         | 0.009774225 | -0.163875331 |
| ENSMUSG00000027099 | Mtx2          | 0.020370398 | -0.164197132 |
| ENSMUSG0000004631  | Sgce          | 0.011624945 | -0.164524868 |
| ENSMUSG00000046139 | Patl1         | 0.018712502 | -0.164670837 |
| ENSMUSG00000028081 | Rps3a1        | 0.015496595 | -0.164804747 |
| ENSMUSG00000022228 | Zscan26       | 0.031541409 | -0.164906128 |
| ENSMUSG00000019428 | Fkbp8         | 0.007961316 | -0.165713776 |
| ENSMUSG00000026457 | Adipor1       | 0.008167361 | -0.165764322 |
| ENSMUSG00000018476 | Kdm6b         | 0.02260672  | -0.165942218 |
| ENSMUSG00000039218 | Srrm2         | 0.019652488 | -0.166188386 |
| ENSMUSG00000031021 | Tmem9b        | 0.015544247 | -0.166295686 |
| ENSMUSG00000037486 | Asxl2         | 0.042052204 | -0.166550973 |
| ENSMUSG00000025260 | Hsd17b10      | 0.021872233 | -0.166650761 |
| ENSMUSG00000071415 | Rpl23         | 0.009173041 | -0.166874879 |
| ENSMUSG00000022108 | Itm2b         | 0.029130033 | -0.167030702 |
| ENSMUSG00000042650 | Alkbh5        | 0.008586024 | -0.167094024 |
| ENSMUSG00000044148 | 1810030O07Rik | 0.012876654 | -0.167151169 |
| ENSMUSG00000030826 | Bcat2         | 0.027542358 | -0.167559421 |
| ENSMUSG00000033382 | Trappc8       | 0.009115784 | -0.16789084  |
| ENSMUSG00000028893 | Sesn2         | 0.042514301 | -0.168343832 |
| ENSMUSG00000046364 | Rpl27a        | 0.008691356 | -0.16834882  |
| ENSMUSG00000036402 | Gng12         | 0.008452    | -0.168659085 |
| ENSMUSG00000025509 | Pnpla2        | 0.015680384 | -0.168988399 |
| ENSMUSG00000036751 | Cox6b1        | 0.006687317 | -0.169382919 |
| ENSMUSG00000030272 | Camk1         | 0.035648657 | -0.169657119 |
| ENSMUSG00000068739 | Sars          | 0.032403165 | -0.170170773 |
| ENSMUSG00000032959 | Pebp1         | 0.005760419 | -0.170203696 |
| ENSMUSG00000018196 | Glrx2         | 0.037042069 | -0.170291379 |
| ENSMUSG00000020056 | Washc3        | 0.024284428 | -0.170664475 |
| ENSMUSG00000018501 | Ncor1         | 0.045490377 | -0.171293419 |
| ENSMUSG00000035203 | Epn1          | 0.009362075 | -0.171426238 |
| ENSMUSG00000015536 | Mocs2         | 0.018287762 | -0.1715004   |
| ENSMUSG00000021361 | Tmem14c       | 0.007504406 | -0.171565427 |

|                    |               |             |              |
|--------------------|---------------|-------------|--------------|
| ENSMUSG00000025968 | Ndufs1        | 0.01352785  | -0.17164157  |
| ENSMUSG00000020621 | Rdh14         | 0.049380981 | -0.171885291 |
| ENSMUSG00000025791 | Pgm2          | 0.022428591 | -0.171996179 |
| ENSMUSG00000116466 | Pgm2          | 0.022428591 | -0.171996179 |
| ENSMUSG00000049760 | 2410015M20Rik | 0.014972127 | -0.172077079 |
| ENSMUSG00000042770 | Hebp1         | 0.017999812 | -0.17238481  |
| ENSMUSG00000013367 | Iglon5        | 0.019583178 | -0.172395886 |
| ENSMUSG00000031672 | Got2          | 0.007260201 | -0.17256975  |
| ENSMUSG00000024959 | Bad           | 0.047015809 | -0.172686624 |
| ENSMUSG00000028224 | Nbn           | 0.030543738 | -0.172902023 |
| ENSMUSG00000019883 | Echdc1        | 0.029622502 | -0.172959363 |
| ENSMUSG00000042043 | Tbca          | 0.007185752 | -0.173041121 |
| ENSMUSG00000019432 | Ddx39b        | 0.005480467 | -0.17331603  |
| ENSMUSG00000035227 | Spcs2         | 0.009166653 | -0.173336622 |
| ENSMUSG00000013593 | Ndufs2        | 0.009115784 | -0.173381655 |
| ENSMUSG00000023973 | Cnpy3         | 0.043425279 | -0.173500063 |
| ENSMUSG00000032436 | Cmtm7         | 0.005323151 | -0.173628627 |
| ENSMUSG00000041697 | Cox6a1        | 0.031265318 | -0.173979387 |
| ENSMUSG00000034593 | Myo5a         | 0.015272157 | -0.174432665 |
| ENSMUSG00000035521 | Gnptg         | 0.019606452 | -0.174477866 |
| ENSMUSG00000042705 | Commd10       | 0.020583843 | -0.174506875 |
| ENSMUSG00000024659 | Anxa1         | 0.004285211 | -0.174576004 |
| ENSMUSG00000019710 | Mrpl24        | 0.014539123 | -0.175684122 |
| ENSMUSG00000014353 | Tmem87b       | 0.015916174 | -0.176000294 |
| ENSMUSG00000015790 | Surf1         | 0.046006194 | -0.176003584 |
| ENSMUSG00000040385 | Ppp1ca        | 0.004142117 | -0.176071704 |
| ENSMUSG00000096994 | Ppp1ca        | 0.004142117 | -0.176071704 |
| ENSMUSG00000037669 | Ldah          | 0.041257994 | -0.176133462 |
| ENSMUSG00000021807 | Rtraf         | 0.021388849 | -0.176158146 |
| ENSMUSG00000024952 | Rps6ka4       | 0.007360064 | -0.176262021 |
| ENSMUSG0000002625  | Akap8l        | 0.017384564 | -0.176456103 |
| ENSMUSG00000037174 | Elf2          | 0.009246359 | -0.1765516   |
| ENSMUSG00000030588 | Yif1b         | 0.006254846 | -0.176578923 |
| ENSMUSG00000022559 | Fbxl6         | 0.046134938 | -0.176846436 |
| ENSMUSG00000028223 | Decr1         | 0.046469172 | -0.176857086 |
| ENSMUSG00000059518 | Znhit1        | 0.026269562 | -0.177225747 |
| ENSMUSG00000042712 | Tceal9        | 0.004285211 | -0.177300516 |
| ENSMUSG00000060419 | Rps16-ps2     | 0.00543262  | -0.177313795 |
| ENSMUSG00000026393 | Nek7          | 0.006153974 | -0.17759082  |
| ENSMUSG00000062604 | Srpk2         | 0.01672061  | -0.177742014 |
| ENSMUSG00000044667 | Polr2e        | 0.00938309  | -0.177913015 |
| ENSMUSG00000039206 | Daglb         | 0.04640096  | -0.177991934 |
| ENSMUSG00000073676 | Hspe1         | 0.010651616 | -0.178056566 |
| ENSMUSG00000084349 | Rpl3-ps1      | 0.005919746 | -0.178333709 |
| ENSMUSG00000024561 | Mbd1          | 0.038375139 | -0.178493525 |
| ENSMUSG00000066278 | Vps37b        | 0.0345848   | -0.178520209 |
| ENSMUSG00000061315 | Naca          | 0.023169088 | -0.178632103 |

|                    |               |             |              |
|--------------------|---------------|-------------|--------------|
| ENSMUSG00000052837 | Junb          | 0.030619452 | -0.178871848 |
| ENSMUSG00000029560 | Snx8          | 0.010173941 | -0.178970571 |
| ENSMUSG00000035614 | Togaram1      | 0.027288039 | -0.17911685  |
| ENSMUSG00000021190 | Lgmn          | 0.003877624 | -0.179319471 |
| ENSMUSG00000057147 | Dph6          | 0.020237558 | -0.179640518 |
| ENSMUSG00000028161 | Ppp3ca        | 0.008752858 | -0.179669496 |
| ENSMUSG00000021290 | 2010107E04Rik | 0.005762887 | -0.179875217 |
| ENSMUSG00000072568 | Fam84b        | 0.013308946 | -0.180308247 |
| ENSMUSG00000002767 | Mrpl2         | 0.03122862  | -0.180465416 |
| ENSMUSG00000069117 | Gm10260       | 0.00378383  | -0.180915107 |
| ENSMUSG00000031696 | Vps35         | 0.008690979 | -0.181030837 |
| ENSMUSG00000028878 | Fam76a        | 0.028112852 | -0.181108813 |
| ENSMUSG00000037458 | Azin1         | 0.013055489 | -0.181707242 |
| ENSMUSG00000006423 | C330007P06Rik | 0.009558735 | -0.181745872 |
| ENSMUSG00000044224 | Dnajc21       | 0.025439464 | -0.181968108 |
| ENSMUSG00000028423 | Nfx1          | 0.018111643 | -0.182425935 |
| ENSMUSG00000068391 | Chrac1        | 0.046958677 | -0.182593154 |
| ENSMUSG00000033526 | Ppip5k1       | 0.022418468 | -0.182695917 |
| ENSMUSG00000024413 | Npc1          | 0.016873516 | -0.182858032 |
| ENSMUSG00000004610 | Etfb          | 0.005620313 | -0.18375365  |
| ENSMUSG00000051154 | Commd3        | 0.005388063 | -0.184077095 |
| ENSMUSG00000032666 | 1700025G04Rik | 0.042300793 | -0.184428129 |
| ENSMUSG00000029467 | Atp2a2        | 0.007577603 | -0.184620776 |
| ENSMUSG00000039068 | Zzz3          | 0.006405676 | -0.184708766 |
| ENSMUSG00000026349 | Ccnt2         | 0.01737784  | -0.184898389 |
| ENSMUSG00000079557 | 02-Mar        | 0.025331874 | -0.184900004 |
| ENSMUSG00000023939 | Mrpl14        | 0.0220206   | -0.185016941 |
| ENSMUSG00000060591 | Ifitm2        | 0.002839166 | -0.185503577 |
| ENSMUSG00000018567 | Gabarap       | 0.00269696  | -0.18595704  |
| ENSMUSG00000075595 | Zfp652        | 0.0130238   | -0.185987052 |
| ENSMUSG00000028691 | Prdx1         | 0.01375383  | -0.186044505 |
| ENSMUSG00000031565 | Fgfr1         | 0.008643079 | -0.187088423 |
| ENSMUSG00000078656 | Vps25         | 0.009342312 | -0.187368236 |
| ENSMUSG00000001962 | Fam50a        | 0.004210773 | -0.187468415 |
| ENSMUSG00000031467 | Agpat5        | 0.006442147 | -0.187876571 |
| ENSMUSG00000029233 | Srd5a3        | 0.04653143  | -0.188092709 |
| ENSMUSG00000002147 | Stat6         | 0.014673185 | -0.188138243 |
| ENSMUSG00000020477 | Mrps24        | 0.010646238 | -0.188169393 |
| ENSMUSG00000045427 | Hnrnph2       | 0.002470025 | -0.188200068 |
| ENSMUSG00000027331 | Knstrn        | 0.026999703 | -0.188296975 |
| ENSMUSG00000020315 | Sptbn1        | 0.038661694 | -0.188529434 |
| ENSMUSG00000004980 | Hnrnpa2b1     | 0.004594988 | -0.188534583 |
| ENSMUSG00000069833 | Ahnak         | 0.002698715 | -0.189178902 |
| ENSMUSG00000020261 | Slc36a1       | 0.042012546 | -0.189309214 |
| ENSMUSG00000005469 | Prkaca        | 0.01065099  | -0.189661952 |
| ENSMUSG00000021134 | Srsf5         | 0.002314619 | -0.189756585 |
| ENSMUSG00000047675 | Rps8          | 0.002085099 | -0.18985426  |

|                    |           |             |              |
|--------------------|-----------|-------------|--------------|
| ENSMUSG00000036748 | Cuedc2    | 0.002417364 | -0.190074784 |
| ENSMUSG00000028995 | Fam126a   | 0.004354968 | -0.190362329 |
| ENSMUSG00000033307 | Mif       | 0.002204792 | -0.19060514  |
| ENSMUSG00000053470 | Kdm3a     | 0.034657362 | -0.190656888 |
| ENSMUSG00000075232 | Amd1      | 0.017898583 | -0.190718811 |
| ENSMUSG00000020476 | Dbnl      | 0.002792727 | -0.190758494 |
| ENSMUSG00000060147 | Serpinb6a | 0.048217971 | -0.190975943 |
| ENSMUSG00000068267 | Cenpb     | 0.00176985  | -0.191559425 |
| ENSMUSG00000022982 | Sod1      | 0.001899913 | -0.191723517 |
| ENSMUSG00000015002 | Efr3a     | 0.013443324 | -0.191887378 |
| ENSMUSG00000046962 | Zbtb21    | 0.023273018 | -0.191995546 |
| ENSMUSG00000004268 | Emg1      | 0.004838017 | -0.192184163 |
| ENSMUSG00000079316 | Rab9      | 0.016284552 | -0.192441897 |
| ENSMUSG00000020962 | Gtf2a1    | 0.036108046 | -0.192514948 |
| ENSMUSG00000000399 | Ndufa9    | 0.002328164 | -0.192598488 |
| ENSMUSG00000072501 | Phf20l1   | 0.003734182 | -0.192818336 |
| ENSMUSG00000032621 | Srek1     | 0.034785378 | -0.192904438 |
| ENSMUSG00000030652 | Coq7      | 0.016932799 | -0.19303841  |
| ENSMUSG00000022338 | Eny2      | 0.002911943 | -0.193043312 |
| ENSMUSG00000039047 | Pigk      | 0.004841982 | -0.193179322 |
| ENSMUSG00000026895 | Ndufa8    | 0.001899913 | -0.193528909 |
| ENSMUSG00000023952 | Gtpbp2    | 0.049729951 | -0.194331976 |
| ENSMUSG00000040331 | Nsmce4a   | 0.009707537 | -0.194385114 |
| ENSMUSG00000033685 | Ucp2      | 0.00468286  | -0.194638896 |
| ENSMUSG00000047844 | Bex4      | 0.015359684 | -0.194701299 |
| ENSMUSG00000037563 | Rps16     | 0.002086021 | -0.194927673 |
| ENSMUSG00000000278 | Scpep1    | 0.049020574 | -0.195025872 |
| ENSMUSG00000056851 | Pcbp2     | 0.001417074 | -0.195244083 |
| ENSMUSG00000049960 | Mrps16    | 0.030801103 | -0.195649027 |
| ENSMUSG00000048118 | Arid4a    | 0.013465062 | -0.195811582 |
| ENSMUSG00000049800 | Sertad2   | 0.012904345 | -0.196184132 |
| ENSMUSG00000064210 | Ano6      | 0.001430854 | -0.196229958 |
| ENSMUSG00000032411 | Tfdp2     | 0.033706037 | -0.196251413 |
| ENSMUSG00000052298 | Cdc42se2  | 0.007962265 | -0.196284753 |
| ENSMUSG00000038014 | Fam120a   | 0.001538889 | -0.196313305 |
| ENSMUSG0000003813  | Rad23a    | 0.017545353 | -0.196365319 |
| ENSMUSG00000037622 | Wdtdc1    | 0.025220684 | -0.196936936 |
| ENSMUSG00000022564 | Grina     | 0.037689991 | -0.197026725 |
| ENSMUSG00000047554 | Tmem41b   | 0.012923457 | -0.197585567 |
| ENSMUSG00000032349 | Elovl5    | 0.00304386  | -0.197707579 |
| ENSMUSG00000027937 | Jtb       | 0.003405796 | -0.198106752 |
| ENSMUSG00000046949 | Nqo2      | 0.027249438 | -0.198325245 |
| ENSMUSG00000024349 | Tmem173   | 0.045952158 | -0.198357133 |
| ENSMUSG00000028759 | Hp1bp3    | 0.008597042 | -0.198639293 |
| ENSMUSG0000003033  | Ap1m1     | 0.019708606 | -0.198757471 |
| ENSMUSG00000068921 | Dap3      | 0.00769265  | -0.199907701 |
| ENSMUSG00000063229 | Ldha      | 0.010708054 | -0.200147845 |

|                    |               |             |              |
|--------------------|---------------|-------------|--------------|
| ENSMUSG00000041133 | Smc1a         | 0.021945694 | -0.200396571 |
| ENSMUSG00000020821 | Kif1c         | 0.001197359 | -0.200502833 |
| ENSMUSG00000096887 | Gm20594       | 0.030390665 | -0.200565331 |
| ENSMUSG00000059278 | Naa38         | 0.015960554 | -0.201129155 |
| ENSMUSG00000028289 | Epha7         | 0.039471476 | -0.201263263 |
| ENSMUSG00000018548 | Trim37        | 0.030494276 | -0.20127682  |
| ENSMUSG00000020570 | Sypl          | 0.002965295 | -0.201847895 |
| ENSMUSG00000107283 | Mpv17         | 0.004399673 | -0.202081078 |
| ENSMUSG00000025154 | Arhgap19      | 0.017178616 | -0.202504145 |
| ENSMUSG00000031591 | Asah1         | 0.002677368 | -0.202922148 |
| ENSMUSG00000073471 | Rsph3a        | 0.008490717 | -0.203010886 |
| ENSMUSG00000075391 | Gm13443       | 0.040637574 | -0.203316407 |
| ENSMUSG00000054408 | Spcs3         | 0.000896852 | -0.203717858 |
| ENSMUSG00000035342 | Lzts2         | 0.039290893 | -0.203750852 |
| ENSMUSG00000020650 | Bcap29        | 0.007898746 | -0.204285529 |
| ENSMUSG00000036499 | Eea1          | 0.002446444 | -0.204291728 |
| ENSMUSG00000034932 | Mrpl54        | 0.010314909 | -0.204352206 |
| ENSMUSG00000028013 | Ppa2          | 0.024687121 | -0.204365866 |
| ENSMUSG00000020448 | Rnf185        | 0.002911943 | -0.205053908 |
| ENSMUSG00000020321 | Mdh1          | 0.001692265 | -0.205068185 |
| ENSMUSG00000027582 | Zgpat         | 0.007956187 | -0.205085461 |
| ENSMUSG00000045838 | A430105I19Rik | 0.001488441 | -0.205442748 |
| ENSMUSG00000032518 | Rpsa          | 0.001813552 | -0.205872598 |
| ENSMUSG00000045973 | Slc25a51      | 0.039030393 | -0.20611885  |
| ENSMUSG00000022867 | Usp25         | 0.003721124 | -0.206291277 |
| ENSMUSG00000025825 | Iscu          | 0.029239163 | -0.207417925 |
| ENSMUSG00000040811 | Eml2          | 0.006132855 | -0.207622145 |
| ENSMUSG00000030432 | Rpl28         | 0.007177851 | -0.207711784 |
| ENSMUSG00000041028 | Ghitm         | 0.001275275 | -0.207731191 |
| ENSMUSG00000026755 | Arpc5l        | 0.003861279 | -0.207816755 |
| ENSMUSG00000028138 | Adh5          | 0.001306015 | -0.207830567 |
| ENSMUSG00000031299 | Pdha1         | 0.000853471 | -0.207974585 |
| ENSMUSG00000063011 | Msln          | 0.041167861 | -0.208135596 |
| ENSMUSG00000029403 | Cdkl2         | 0.037978237 | -0.208476427 |
| ENSMUSG00000035597 | Prpf39        | 0.009123866 | -0.208511408 |
| ENSMUSG00000029156 | Sgcb          | 0.023685384 | -0.20926904  |
| ENSMUSG00000045180 | Shroom2       | 0.020430394 | -0.209324264 |
| ENSMUSG00000030647 | Ndufc2        | 0.00127635  | -0.209430484 |
| ENSMUSG00000061286 | Exosc5        | 0.016123195 | -0.209553557 |
| ENSMUSG00000014873 | Surf2         | 0.016528132 | -0.209655047 |
| ENSMUSG00000074649 | BC029722      | 0.002523958 | -0.209804662 |
| ENSMUSG00000040813 | Tex264        | 0.034042819 | -0.20984139  |
| ENSMUSG00000025558 | Dock9         | 0.005093848 | -0.209926794 |
| ENSMUSG00000005054 | Cstb          | 0.000482297 | -0.210101341 |
| ENSMUSG00000069014 | Gm5641        | 0.010375208 | -0.210341666 |
| ENSMUSG00000010554 | Mettl16       | 0.017350017 | -0.210381268 |
| ENSMUSG00000040907 | Atp1a3        | 0.001101092 | -0.210391079 |

|                    |            |             |              |
|--------------------|------------|-------------|--------------|
| ENSMUSG00000016528 | Mapkapk2   | 0.00048233  | -0.210418811 |
| ENSMUSG00000020115 | Tbk1       | 0.019278562 | -0.210693122 |
| ENSMUSG00000056692 | D17Wsu92e  | 0.001588293 | -0.210730739 |
| ENSMUSG00000017286 | Glod4      | 0.034108785 | -0.210846913 |
| ENSMUSG00000058443 | Rpl10-ps3  | 0.003036278 | -0.210977102 |
| ENSMUSG00000078713 | Tomm5      | 0.004272471 | -0.211080746 |
| ENSMUSG00000030615 | Tmem126a   | 0.00215019  | -0.212297279 |
| ENSMUSG00000034160 | Ogt        | 0.026019565 | -0.212729255 |
| ENSMUSG00000049090 | Zadh2      | 0.012885198 | -0.213076279 |
| ENSMUSG00000071724 | Smpd5      | 0.030257889 | -0.213169341 |
| ENSMUSG00000028954 | Nub1       | 0.043623432 | -0.213454506 |
| ENSMUSG00000014313 | Cox6c      | 0.000961362 | -0.213495244 |
| ENSMUSG00000039458 | Mtmr12     | 0.003753545 | -0.213679798 |
| ENSMUSG00000018858 | Mrpl58     | 0.011090976 | -0.213733349 |
| ENSMUSG00000054517 | Trim65     | 0.030926984 | -0.214116449 |
| ENSMUSG00000001666 | Ddt        | 0.020663434 | -0.214765335 |
| ENSMUSG00000005949 | Ctns       | 0.032435399 | -0.215417584 |
| ENSMUSG00000068328 | Aup1       | 0.001927646 | -0.215875885 |
| ENSMUSG00000022617 | Chkb       | 0.016624664 | -0.216051015 |
| ENSMUSG00000024181 | Mrpl28     | 0.004294735 | -0.216258146 |
| ENSMUSG00000002010 | Idh3g      | 0.002240125 | -0.216396472 |
| ENSMUSG00000026034 | Clk1       | 0.017898583 | -0.216555925 |
| ENSMUSG00000041328 | Pcf11      | 0.027288039 | -0.217604731 |
| ENSMUSG00000027822 | Slc33a1    | 0.002906253 | -0.217607683 |
| ENSMUSG00000060601 | Nr1h2      | 0.023742351 | -0.217699228 |
| ENSMUSG00000059714 | Flot1      | 0.001264501 | -0.217846272 |
| ENSMUSG00000034647 | Ankrd12    | 0.032707351 | -0.218248949 |
| ENSMUSG00000035757 | Selenoo    | 0.021043255 | -0.218261344 |
| ENSMUSG00000029714 | Gigyf1     | 0.009389097 | -0.218398204 |
| ENSMUSG00000024360 | Etf1       | 0.000227357 | -0.218509839 |
| ENSMUSG00000021109 | Hif1a      | 0.011472147 | -0.21870116  |
| ENSMUSG00000019578 | Ubxn6      | 0.009214718 | -0.218814962 |
| ENSMUSG00000041747 | Utp15      | 0.043614283 | -0.219112681 |
| ENSMUSG00000035242 | Oaz1       | 0.000279252 | -0.219228019 |
| ENSMUSG00000024357 | Sil1       | 0.001244609 | -0.219498237 |
| ENSMUSG00000020267 | Hint1      | 0.00025104  | -0.22009165  |
| ENSMUSG00000020253 | Ppm1m      | 0.013422263 | -0.220248647 |
| ENSMUSG00000032540 | Abhd5      | 0.003864439 | -0.220455932 |
| ENSMUSG00000005981 | Trap1      | 0.006911534 | -0.221006178 |
| ENSMUSG00000046404 | Yod1       | 0.022844042 | -0.221037853 |
| ENSMUSG00000042626 | Shc1       | 0.002289225 | -0.221144506 |
| ENSMUSG00000022663 | Atg3       | 0.001470691 | -0.221459946 |
| ENSMUSG00000030805 | Stx4a      | 0.001585073 | -0.221977685 |
| ENSMUSG00000037355 | Uvssa      | 0.012452403 | -0.22212716  |
| ENSMUSG00000021748 | Pdhb       | 0.003027373 | -0.222332383 |
| ENSMUSG00000026811 | St6galnac6 | 0.010725335 | -0.222682419 |
| ENSMUSG00000071014 | Ndufb6     | 0.000390174 | -0.22273137  |



|                     |           |             |              |
|---------------------|-----------|-------------|--------------|
| ENSMUSG00000051730  | Mettl5    | 0.042236482 | -0.222799408 |
| ENSMUSG00000032330  | Cox7a2    | 0.000290365 | -0.222821331 |
| ENSMUSG00000096210  | H1f0      | 0.001761902 | -0.223008957 |
| ENSMUSG00000048109  | Rbm15     | 0.009144211 | -0.223128591 |
| ENSMUSG00000006715  | Gmnn      | 0.002249466 | -0.223981665 |
| ENSMUSG00000034744  | Nagk      | 0.001806248 | -0.224177583 |
| ENSMUSG00000022463  | Srebf2    | 0.000264678 | -0.224289069 |
| ENSMUSG00000030750  | Nsmce1    | 0.004093484 | -0.224324744 |
| ENSMUSG00000060002  | Chpt1     | 0.017622186 | -0.224491621 |
| ENSMUSG00000006390  | Elovl1    | 0.003253466 | -0.224520148 |
| ENSMUSG00000034487  | Kdelc2    | 0.04164121  | -0.224557822 |
| ENSMUSG00000028551  | Cdkn2c    | 0.00858598  | -0.224560797 |
| ENSMUSG00000016319  | Slc25a5   | 0.000246601 | -0.224932673 |
| ENSMUSG00000058709  | Egln2     | 0.001483968 | -0.225144442 |
| ENSMUSG00000002949  | Timm44    | 0.004831853 | -0.225298452 |
| ENSMUSG00000037286  | Stag1     | 0.007577603 | -0.225304272 |
| ENSMUSG00000037957  | Wdr20     | 0.043364841 | -0.225419161 |
| ENSMUSG00000034663  | Bmp2k     | 0.000370695 | -0.225581848 |
| ENSMUSG00000047989  | Ino80c    | 0.005681842 | -0.225675427 |
| ENSMUSG00000074582  | Arfgef2   | 0.000596945 | -0.225710616 |
| ENSMUSG00000038690  | Atp5j2    | 0.000209377 | -0.225798627 |
| ENSMUSG00000063882  | Uqcrh     | 0.000356167 | -0.22582258  |
| ENSMUSG00000024414  | Mrpl27    | 0.003780473 | -0.225829337 |
| ENSMUSG00000028019  | Pdgfc     | 0.001036153 | -0.226074864 |
| ENSMUSG00000025409  | Mbd6      | 0.034549869 | -0.226776095 |
| ENSMUSG00000050856  | Atp5k     | 0.000387773 | -0.227177193 |
| ENSMUSG00000034135  | Sik3      | 0.00042026  | -0.227215162 |
| ENSMUSG00000022742  | Cpox      | 0.000971794 | -0.22802319  |
| ENSMUSG00000027709  | Mccc1     | 0.049076619 | -0.228204955 |
| ENSMUSG00000014294  | Ndufa2    | 0.00027534  | -0.228683525 |
| ENSMUSG00000024143  | Rhoq      | 0.000382456 | -0.228935686 |
| ENSMUSG00000019689  | Fmc1      | 0.044054352 | -0.229054723 |
| ENSMUSG00000049091  | Sephs2    | 0.026312024 | -0.229084374 |
| ENSMUSG00000048371  | Pdp2      | 0.018049778 | -0.229300836 |
| ENSMUSG00000000600  | Krit1     | 0.002131727 | -0.229443844 |
| ENSMUSG00000026478  | Lamc1     | 0.000349947 | -0.229564082 |
| ENSMUSG00000028405  | Aco1      | 0.010725335 | -0.229568878 |
| ENSMUSG00000058454  | Dhcr7     | 0.005834269 | -0.22965669  |
| ENSMUSG000000061474 | Mrps36    | 0.002235069 | -0.229682541 |
| ENSMUSG00000031231  | Cox7b     | 0.000658737 | -0.229855043 |
| ENSMUSG00000021143  | Pacs2     | 0.000250289 | -0.229964945 |
| ENSMUSG00000040048  | Ndufb10   | 0.000317663 | -0.230974136 |
| ENSMUSG00000026578  | Ccdc181   | 0.007504406 | -0.231145023 |
| ENSMUSG00000004707  | Ly9       | 0.00346415  | -0.231167795 |
| ENSMUSG00000025192  | Entpd7    | 0.033322279 | -0.231169367 |
| ENSMUSG00000028245  | Nsmaf     | 0.014316855 | -0.231267459 |
| ENSMUSG00000058603  | Rpl28-ps1 | 0.000144898 | -0.231345252 |

|                    |               |             |              |
|--------------------|---------------|-------------|--------------|
| ENSMUSG00000060538 | Tmem219       | 0.025701824 | -0.231363514 |
| ENSMUSG00000063931 | Pepd          | 0.002470025 | -0.231462703 |
| ENSMUSG00000044792 | Isca1         | 0.000315806 | -0.231970026 |
| ENSMUSG00000033938 | Ndufb7        | 0.000330518 | -0.232099761 |
| ENSMUSG00000033543 | Gtf2a2        | 0.001072002 | -0.232518186 |
| ENSMUSG00000059447 | Hadhb         | 0.001176858 | -0.232675    |
| ENSMUSG00000032018 | Sc5d          | 0.017685004 | -0.232948868 |
| ENSMUSG00000020741 | Cluh          | 0.027461539 | -0.232975692 |
| ENSMUSG00000047250 | Ptgs1         | 0.002046545 | -0.233170394 |
| ENSMUSG00000087260 | Lamtor5       | 0.000304106 | -0.233251574 |
| ENSMUSG00000024194 | Cuta          | 0.000538452 | -0.233413736 |
| ENSMUSG00000028962 | Slc4a2        | 0.001156064 | -0.233637813 |
| ENSMUSG00000024525 | Impa2         | 0.026082444 | -0.234186661 |
| ENSMUSG00000004285 | Atp6v1f       | 0.000282007 | -0.234824663 |
| ENSMUSG00000003072 | Atp5d         | 8.07E-05    | -0.234826746 |
| ENSMUSG00000016427 | Ndufa1        | 0.001407742 | -0.235192312 |
| ENSMUSG00000031245 | Hmgn5         | 0.045791634 | -0.235322206 |
| ENSMUSG00000010607 | Pigyl         | 0.004663722 | -0.235665099 |
| ENSMUSG00000031309 | Rps6ka3       | 0.014013376 | -0.235732399 |
| ENSMUSG00000027763 | Mbnl1         | 0.001031719 | -0.235790247 |
| ENSMUSG00000030678 | Maz           | 0.008740221 | -0.235802832 |
| ENSMUSG00000033916 | Chmp2a        | 0.000127357 | -0.235857717 |
| ENSMUSG00000049489 | Fam58b        | 0.009160034 | -0.235956147 |
| ENSMUSG00000025225 | Nfkb2         | 0.000401484 | -0.236104436 |
| ENSMUSG00000041375 | Ccdc9         | 0.036535013 | -0.236535561 |
| ENSMUSG00000097394 | Tmem134       | 0.000601079 | -0.236692617 |
| ENSMUSG00000021785 | Ngly1         | 0.048217971 | -0.236695788 |
| ENSMUSG00000027775 | Mfsd1         | 0.028327751 | -0.236790192 |
| ENSMUSG00000027282 | Mtch2         | 0.00023451  | -0.237133784 |
| ENSMUSG00000111714 | Mtch2         | 0.00023451  | -0.237133784 |
| ENSMUSG00000026014 | Raph1         | 0.014916211 | -0.237334192 |
| ENSMUSG00000062352 | Itgb1bp1      | 0.003127556 | -0.238104328 |
| ENSMUSG00000050732 | Vamp8         | 9.30E-05    | -0.238325056 |
| ENSMUSG00000103205 | Vamp8         | 9.30E-05    | -0.238325056 |
| ENSMUSG00000006299 | Aamp          | 8.37E-05    | -0.238607354 |
| ENSMUSG00000047712 | Ust           | 0.001301916 | -0.238949577 |
| ENSMUSG00000006024 | Napa          | 0.00190997  | -0.239049943 |
| ENSMUSG00000036503 | Rnf13         | 0.000197369 | -0.239081493 |
| ENSMUSG00000028980 | H6pd          | 0.01234719  | -0.23951107  |
| ENSMUSG00000016087 | Fli1          | 0.013260515 | -0.239785589 |
| ENSMUSG00000043162 | Pyurf         | 0.011510343 | -0.240092086 |
| ENSMUSG00000063568 | Jazf1         | 0.009919994 | -0.240122177 |
| ENSMUSG00000022913 | Psmg1         | 0.035996805 | -0.240291771 |
| ENSMUSG00000031555 | Adam9         | 0.015022816 | -0.240492261 |
| ENSMUSG00000062619 | 2310039H08Rik | 0.006608356 | -0.241101055 |
| ENSMUSG00000026094 | Stk17b        | 0.00115477  | -0.241178612 |
| ENSMUSG00000074064 | Mlycd         | 0.048612208 | -0.241280626 |

|                    |           |             |              |
|--------------------|-----------|-------------|--------------|
| ENSMUSG00000031818 | Cox4i1    | 5.02E-05    | -0.241303289 |
| ENSMUSG00000022114 | Spry2     | 0.039471381 | -0.241319006 |
| ENSMUSG00000038593 | Tctn1     | 0.049886862 | -0.241356501 |
| ENSMUSG00000029063 | Nadk      | 0.010338688 | -0.241440466 |
| ENSMUSG00000021577 | Sdha      | 0.000304552 | -0.24150025  |
| ENSMUSG00000028322 | Exosc3    | 0.014559343 | -0.241557083 |
| ENSMUSG00000025602 | Zfp202    | 0.031704577 | -0.241779927 |
| ENSMUSG00000020612 | Prkar1a   | 3.51E-05    | -0.242219906 |
| ENSMUSG00000024099 | Ndufv2    | 0.0001067   | -0.242603531 |
| ENSMUSG00000026211 | Obsl1     | 0.028772669 | -0.242672228 |
| ENSMUSG00000015087 | Rabl6     | 0.003561799 | -0.242688735 |
| ENSMUSG00000021496 | Pcbd2     | 0.034100474 | -0.243207495 |
| ENSMUSG00000061981 | Flot2     | 0.000496472 | -0.243503137 |
| ENSMUSG00000052031 | Tagap1    | 0.001385766 | -0.243548003 |
| ENSMUSG00000022558 | Mroh1     | 0.003576193 | -0.244252602 |
| ENSMUSG00000025486 | Sirt3     | 0.025455208 | -0.244513008 |
| ENSMUSG00000053333 | Dis3l2    | 0.027674885 | -0.244648072 |
| ENSMUSG00000037808 | Fam76b    | 0.042071054 | -0.244698125 |
| ENSMUSG00000036199 | Ndufa13   | 0.000157443 | -0.244752331 |
| ENSMUSG00000026571 | Dcaf6     | 0.003755112 | -0.244987636 |
| ENSMUSG00000041168 | Lonp1     | 0.000347462 | -0.245077757 |
| ENSMUSG00000017778 | Cox7c     | 3.56E-05    | -0.245126264 |
| ENSMUSG00000025169 | Ogfod3    | 0.024268042 | -0.245452162 |
| ENSMUSG00000024588 | Fech      | 0.002664708 | -0.24550028  |
| ENSMUSG00000078681 | Tm2d3     | 0.005317662 | -0.245750621 |
| ENSMUSG00000020078 | Vps26a    | 5.78E-05    | -0.246603553 |
| ENSMUSG00000027010 | Slc25a12  | 0.002065486 | -0.246680875 |
| ENSMUSG00000031488 | Rab11fip1 | 0.022856462 | -0.246681864 |
| ENSMUSG00000031158 | Timm17b   | 0.01789565  | -0.246784482 |
| ENSMUSG00000034349 | Smc4      | 0.000872924 | -0.247313422 |
| ENSMUSG00000049232 | Tigd2     | 0.005293998 | -0.247525458 |
| ENSMUSG00000032352 | Lrrc1     | 0.003164351 | -0.247633962 |
| ENSMUSG00000033380 | Rabac1    | 0.009506544 | -0.247956836 |
| ENSMUSG00000036513 | Commd2    | 0.001964975 | -0.24888007  |
| ENSMUSG00000026113 | Inpp4a    | 0.020846698 | -0.249188944 |
| ENSMUSG00000029632 | Ndufa4    | 0.001998962 | -0.249242206 |
| ENSMUSG00000019813 | Cep57l1   | 0.033976975 | -0.249263939 |
| ENSMUSG00000056260 | Lrif1     | 0.004217745 | -0.249388463 |
| ENSMUSG00000038866 | Zcchc2    | 0.001561984 | -0.249882544 |
| ENSMUSG00000024359 | Hspa9     | 0.004002133 | -0.24989092  |
| ENSMUSG00000030850 | Ate1      | 0.001551839 | -0.250255809 |
| ENSMUSG00000068290 | Ddrgrk1   | 0.001217057 | -0.250515965 |
| ENSMUSG00000040359 | Ufl1      | 0.015572687 | -0.250890455 |
| ENSMUSG00000047454 | Gphn      | 0.011679791 | -0.251100447 |
| ENSMUSG00000056429 | Tgoln1    | 5.83E-05    | -0.251571187 |
| ENSMUSG00000015149 | Sirt2     | 0.0001281   | -0.251961865 |
| ENSMUSG00000027207 | Galk2     | 0.001097892 | -0.252229902 |

|                    |          |             |              |
|--------------------|----------|-------------|--------------|
| ENSMUSG00000038612 | Mcl1     | 1.99E-05    | -0.252253772 |
| ENSMUSG00000051355 | Commd1   | 0.00113199  | -0.252447595 |
| ENSMUSG00000031861 | Lpar2    | 0.048217971 | -0.252702581 |
| ENSMUSG00000030086 | Chchd6   | 0.01789565  | -0.252797811 |
| ENSMUSG00000035367 | Rmi1     | 0.000906984 | -0.252999318 |
| ENSMUSG00000014470 | Rnf166   | 0.018825898 | -0.253165016 |
| ENSMUSG00000022453 | Naga     | 0.022792203 | -0.253225108 |
| ENSMUSG00000025792 | Slc25a10 | 0.001574876 | -0.253335167 |
| ENSMUSG00000027447 | Cst3     | 0.047699549 | -0.25351215  |
| ENSMUSG00000027620 | Rbm39    | 0.000213582 | -0.253753638 |
| ENSMUSG00000037966 | Ninj1    | 6.61E-05    | -0.254441634 |
| ENSMUSG00000070003 | Ssbp4    | 0.001247858 | -0.254789691 |
| ENSMUSG00000003031 | Cdkn1b   | 0.033995088 | -0.255001145 |
| ENSMUSG00000039242 | B3galnt2 | 0.007280907 | -0.255086148 |
| ENSMUSG00000024665 | Fads2    | 0.002372192 | -0.25530283  |
| ENSMUSG00000053931 | Cnn3     | 0.016662443 | -0.255471011 |
| ENSMUSG00000063410 | Stk24    | 0.001596229 | -0.255849798 |
| ENSMUSG00000038520 | Tbc1d17  | 0.013838587 | -0.255888228 |
| ENSMUSG00000038812 | Trmt112  | 0.000403089 | -0.256057148 |
| ENSMUSG00000045948 | Mrps12   | 0.002420101 | -0.256272325 |
| ENSMUSG00000057614 | Gnai1    | 0.001365995 | -0.256880446 |
| ENSMUSG00000036552 | Ermard   | 0.002202898 | -0.257536862 |
| ENSMUSG00000020130 | Tbc1d15  | 0.000276157 | -0.257931532 |
| ENSMUSG00000039427 | Alg1     | 0.000420976 | -0.258020149 |
| ENSMUSG00000106918 | Mrpl33   | 5.63E-05    | -0.258101805 |
| ENSMUSG00000030842 | Lamtor1  | 2.76E-05    | -0.25818935  |
| ENSMUSG00000028737 | Aldh4a1  | 0.012877673 | -0.258609306 |
| ENSMUSG00000042229 | Rabif    | 0.027613666 | -0.25900362  |
| ENSMUSG00000000740 | Rpl13    | 2.91E-05    | -0.259187011 |
| ENSMUSG00000072704 | Smim10l1 | 6.84E-05    | -0.259331253 |
| ENSMUSG00000034248 | Slc25a37 | 0.006893057 | -0.259627771 |
| ENSMUSG00000034371 | Tkfc     | 0.001153157 | -0.259660111 |
| ENSMUSG00000023074 | Mospd1   | 0.003809991 | -0.259719401 |
| ENSMUSG00000040952 | Rps19    | 2.43E-05    | -0.2597585   |
| ENSMUSG00000026674 | Ddr2     | 0.000144951 | -0.259836689 |
| ENSMUSG00000014075 | Tctex1d2 | 0.048876694 | -0.260148869 |
| ENSMUSG00000091780 | Sco2     | 0.010464024 | -0.26057485  |
| ENSMUSG00000005514 | Por      | 0.000116666 | -0.260892932 |
| ENSMUSG00000050552 | Lamtor4  | 0.0001067   | -0.261287772 |
| ENSMUSG00000026280 | Atg4b    | 0.021043255 | -0.261386743 |
| ENSMUSG00000032239 | Rp9      | 0.002747292 | -0.261569428 |
| ENSMUSG00000000088 | Cox5a    | 9.45E-06    | -0.261570666 |
| ENSMUSG00000024978 | Gpam     | 0.000421149 | -0.261822051 |
| ENSMUSG00000035199 | Arl6ip5  | 0.000322687 | -0.262194579 |
| ENSMUSG00000006127 | Inpp5k   | 0.003772486 | -0.262197249 |
| ENSMUSG00000030056 | Isy1     | 0.016244814 | -0.262282577 |
| ENSMUSG00000025277 | Abhd6    | 0.006468962 | -0.262568136 |

|                    |          |             |              |
|--------------------|----------|-------------|--------------|
| ENSMUSG00000006589 | Aprt     | 0.000104643 | -0.26264661  |
| ENSMUSG00000021432 | Slc35b3  | 0.003050992 | -0.262822699 |
| ENSMUSG00000036894 | Rap2b    | 0.000427076 | -0.262915695 |
| ENSMUSG00000029780 | Nt5c3    | 0.001872297 | -0.263463225 |
| ENSMUSG00000049882 | Vcpkmt   | 0.042097244 | -0.264263492 |
| ENSMUSG00000056234 | Ncoa4    | 0.000729375 | -0.264544094 |
| ENSMUSG00000025204 | Ndufb8   | 1.53E-05    | -0.264554846 |
| ENSMUSG00000021713 | Ppwd1    | 0.000761062 | -0.264558476 |
| ENSMUSG00000053347 | Zfp943   | 0.03122862  | -0.265498006 |
| ENSMUSG00000115338 | Pnp      | 0.049886292 | -0.266061629 |
| ENSMUSG00000032527 | Pccb     | 0.007662293 | -0.266366895 |
| ENSMUSG0000001891  | Ugp2     | 2.36E-05    | -0.266892004 |
| ENSMUSG00000041625 | Ggact    | 0.016339081 | -0.266897301 |
| ENSMUSG00000027259 | Adal     | 0.008891389 | -0.26705651  |
| ENSMUSG00000031816 | Mthfsd   | 0.026125651 | -0.267213298 |
| ENSMUSG00000037148 | Arhgap10 | 9.72E-05    | -0.26739273  |
| ENSMUSG0000005699  | Pard6a   | 0.026312024 | -0.267436439 |
| ENSMUSG00000022452 | Smdt1    | 3.53E-05    | -0.267658987 |
| ENSMUSG0000001786  | Fbxo7    | 0.002187884 | -0.267737749 |
| ENSMUSG00000030990 | Pgap2    | 0.041838568 | -0.268310399 |
| ENSMUSG00000062753 | Al413582 | 0.011162357 | -0.268320385 |
| ENSMUSG00000058833 | Rex1bd   | 6.93E-05    | -0.268343729 |
| ENSMUSG00000045160 | Bola3    | 0.01123058  | -0.268499356 |
| ENSMUSG00000038717 | Atp5l    | 6.61E-06    | -0.268593431 |
| ENSMUSG00000072946 | Ptgr2    | 0.0001202   | -0.268752634 |
| ENSMUSG00000019841 | Rev3l    | 0.005525722 | -0.269086048 |
| ENSMUSG00000062908 | Acadm    | 0.004661296 | -0.269264497 |
| ENSMUSG00000025962 | Fastkd2  | 0.020583843 | -0.269404346 |
| ENSMUSG00000032497 | Lrrfip2  | 8.27E-05    | -0.269471435 |
| ENSMUSG00000030541 | ldh2     | 0.000601483 | -0.269589034 |
| ENSMUSG00000041720 | Pi4ka    | 2.00E-05    | -0.269941284 |
| ENSMUSG00000029705 | Cux1     | 0.000651405 | -0.270395594 |
| ENSMUSG00000024248 | Cox7a2l  | 0.044790925 | -0.270447587 |
| ENSMUSG00000002763 | Pex6     | 0.009706563 | -0.270583262 |
| ENSMUSG00000025736 | Jmjd8    | 0.016250811 | -0.270720205 |
| ENSMUSG00000020605 | Hs1bp3   | 0.013773624 | -0.270735921 |
| ENSMUSG00000040212 | Emp3     | 1.10E-05    | -0.270835355 |
| ENSMUSG00000039485 | Tspyl4   | 0.012240212 | -0.271814065 |
| ENSMUSG00000034708 | Grn      | 0.019346358 | -0.272287279 |
| ENSMUSG00000038351 | Sgsm2    | 0.001520281 | -0.272462966 |
| ENSMUSG00000056917 | Sipa1    | 0.00040882  | -0.273222402 |
| ENSMUSG00000024378 | Stard4   | 0.01009039  | -0.273271174 |
| ENSMUSG00000036097 | Slf2     | 0.001612894 | -0.273355723 |
| ENSMUSG00000007812 | Zfp655   | 0.000944393 | -0.273468488 |
| ENSMUSG00000058239 | Usf2     | 0.000219459 | -0.273565507 |
| ENSMUSG00000029596 | Sdsl     | 0.001977894 | -0.273940899 |
| ENSMUSG00000039033 | Tasp1    | 0.001142769 | -0.274265037 |

|                    |               |             |              |
|--------------------|---------------|-------------|--------------|
| ENSMUSG00000022551 | Cyc1          | 0.03021081  | -0.274272158 |
| ENSMUSG00000029211 | Gabra4        | 2.48E-05    | -0.274595198 |
| ENSMUSG00000026519 | Tmem63a       | 0.006541315 | -0.274600476 |
| ENSMUSG00000037643 | Prkci         | 0.006655002 | -0.274696263 |
| ENSMUSG00000028788 | Ptp4a2        | 0.000170518 | -0.274723137 |
| ENSMUSG00000031955 | Bcar1         | 0.000211372 | -0.274996325 |
| ENSMUSG0000002820  | Atg4d         | 0.004454604 | -0.275038912 |
| ENSMUSG00000058267 | Mrps14        | 6.44E-05    | -0.275070773 |
| ENSMUSG00000015214 | Mtmr1         | 0.017801845 | -0.275183577 |
| ENSMUSG00000040562 | Gstm2         | 0.000140324 | -0.27565835  |
| ENSMUSG00000052085 | Dock8         | 4.02E-06    | -0.275829501 |
| ENSMUSG00000024601 | Isoc1         | 3.61E-06    | -0.27596337  |
| ENSMUSG00000028248 | Pnlsr         | 0.006352603 | -0.27628824  |
| ENSMUSG00000022974 | Paxbp1        | 0.008416125 | -0.276721542 |
| ENSMUSG00000039682 | Lap3          | 0.031764858 | -0.276825114 |
| ENSMUSG00000022477 | Aco2          | 5.09E-06    | -0.276934206 |
| ENSMUSG00000021606 | Ndufs6        | 7.40E-06    | -0.277582112 |
| ENSMUSG00000093904 | Tomm20        | 2.02E-05    | -0.278407264 |
| ENSMUSG00000039452 | Snx22         | 0.034108785 | -0.27850156  |
| ENSMUSG00000069135 | Fgfr1op       | 0.000161585 | -0.278656017 |
| ENSMUSG00000021171 | Esyt2         | 0.00392748  | -0.279144372 |
| ENSMUSG00000008035 | Mid1ip1       | 0.000314172 | -0.279908308 |
| ENSMUSG00000006585 | Cdt1          | 0.00110828  | -0.280147154 |
| ENSMUSG00000031824 | 6430548M08Rik | 0.001200568 | -0.28044474  |
| ENSMUSG00000075266 | Cenpw         | 0.03709063  | -0.28059289  |
| ENSMUSG00000049076 | Acap2         | 0.005142119 | -0.280680308 |
| ENSMUSG00000056608 | Chd9          | 7.61E-06    | -0.280760203 |
| ENSMUSG00000032218 | Ccnb2         | 0.014763162 | -0.280764947 |
| ENSMUSG00000028066 | Pmf1          | 0.031417054 | -0.28076511  |
| ENSMUSG00000030342 | Cd9           | 0.009162487 | -0.280958871 |
| ENSMUSG00000020696 | Rffl          | 0.015344912 | -0.281097548 |
| ENSMUSG00000086784 | Isoc2a        | 0.000649174 | -0.281098679 |
| ENSMUSG00000021557 | Agtppb1       | 0.032434604 | -0.281199577 |
| ENSMUSG00000059810 | Rgs3          | 0.008104828 | -0.281434881 |
| ENSMUSG00000021646 | Mccc2         | 0.002505524 | -0.281866066 |
| ENSMUSG00000021036 | Sptlc2        | 0.001317024 | -0.282288174 |
| ENSMUSG00000050043 | Tmx2          | 4.18E-05    | -0.282347262 |
| ENSMUSG00000039765 | Cc2d2a        | 0.006390944 | -0.282518458 |
| ENSMUSG00000003762 | Coq8b         | 0.001634691 | -0.282546469 |
| ENSMUSG00000097306 | Rhox5         | 1.31E-06    | -0.282735884 |
| ENSMUSG00000001751 | Naglu         | 0.041875786 | -0.282838397 |
| ENSMUSG00000059248 | O9-Sep        | 7.65E-06    | -0.285092739 |
| ENSMUSG00000038028 | Tigar         | 0.000164135 | -0.285604082 |
| ENSMUSG00000040112 | Mrps35        | 0.03829267  | -0.286080722 |
| ENSMUSG00000042680 | Garem1        | 0.039752457 | -0.2861565   |
| ENSMUSG00000032763 | Ilvbl         | 1.79E-05    | -0.286403588 |
| ENSMUSG00000053898 | Ech1          | 0.025265059 | -0.286589435 |

|                    |               |             |              |
|--------------------|---------------|-------------|--------------|
| ENSMUSG00000020888 | Dvl2          | 0.008528937 | -0.286912775 |
| ENSMUSG00000089715 | Cbx6          | 0.036290554 | -0.286934561 |
| ENSMUSG00000004018 | Fancl         | 0.01643636  | -0.286936761 |
| ENSMUSG00000026343 | Gpr39         | 5.97E-05    | -0.287174923 |
| ENSMUSG00000051022 | Hs3st1        | 0.00501644  | -0.287471293 |
| ENSMUSG00000020474 | Polm          | 0.025439464 | -0.287549607 |
| ENSMUSG00000015501 | Hivep2        | 0.002690195 | -0.288385516 |
| ENSMUSG00000073481 | O2-Mar        | 0.017539177 | -0.288560804 |
| ENSMUSG00000044442 | N6amt1        | 0.00318485  | -0.289294244 |
| ENSMUSG00000055240 | Zfp101        | 0.004294735 | -0.289564906 |
| ENSMUSG00000046229 | Scand1        | 1.23E-06    | -0.290041209 |
| ENSMUSG00000000838 | Fmr1          | 8.98E-07    | -0.290049001 |
| ENSMUSG00000081824 | BC002163      | 0.002973448 | -0.290395095 |
| ENSMUSG00000068329 | Htra2         | 2.89E-05    | -0.290400681 |
| ENSMUSG00000027829 | Ccnl1         | 8.84E-05    | -0.290553039 |
| ENSMUSG00000026307 | Scly          | 0.015299183 | -0.290571787 |
| ENSMUSG00000001100 | Poldip2       | 1.13E-05    | -0.291271623 |
| ENSMUSG00000047719 | Ubiad1        | 0.002395564 | -0.291349466 |
| ENSMUSG00000053768 | Chchd3        | 3.52E-05    | -0.291442125 |
| ENSMUSG00000073889 | Il11ra1       | 0.007729125 | -0.29149269  |
| ENSMUSG00000029401 | Rilpl2        | 0.018932958 | -0.29182016  |
| ENSMUSG00000025762 | Larp1b        | 0.026555288 | -0.291879191 |
| ENSMUSG00000035311 | Gnptab        | 3.52E-05    | -0.292341562 |
| ENSMUSG00000018770 | Atp5g3        | 6.41E-07    | -0.292947045 |
| ENSMUSG00000022553 | Maf1          | 0.022546734 | -0.293103106 |
| ENSMUSG00000056629 | Fkbp2         | 9.45E-06    | -0.29313704  |
| ENSMUSG00000051319 | 1500011K16Rik | 0.013678735 | -0.293341149 |
| ENSMUSG00000025949 | Pikfyve       | 0.001517741 | -0.293592782 |
| ENSMUSG00000030934 | Oat           | 3.81E-07    | -0.293643156 |
| ENSMUSG00000035799 | Twist1        | 0.009122481 | -0.293754693 |
| ENSMUSG00000017774 | Myo1c         | 2.58E-07    | -0.294212314 |
| ENSMUSG00000021048 | Mthfd1        | 2.02E-05    | -0.294297043 |
| ENSMUSG00000032350 | Gclc          | 0.004108657 | -0.295251651 |
| ENSMUSG00000039263 | Npepl1        | 2.94E-05    | -0.295266898 |
| ENSMUSG00000019082 | Slc25a22      | 0.007555278 | -0.295283362 |
| ENSMUSG00000045664 | Cdc42ep2      | 0.00952948  | -0.296293949 |
| ENSMUSG00000031198 | Fundc2        | 0.001234023 | -0.296610063 |
| ENSMUSG00000027378 | Nphp1         | 0.000646638 | -0.296803221 |
| ENSMUSG00000024277 | Mapre2        | 2.37E-05    | -0.297452321 |
| ENSMUSG00000066152 | Slc31a2       | 0.003635346 | -0.297632243 |
| ENSMUSG00000019039 | Dalrd3        | 0.013578642 | -0.2980686   |
| ENSMUSG00000036427 | Gpi1          | 3.64E-07    | -0.298199289 |
| ENSMUSG00000022890 | Atp5j         | 2.87E-06    | -0.298339456 |
| ENSMUSG00000055553 | Kxd1          | 0.005275268 | -0.298535997 |
| ENSMUSG00000028646 | Rragc         | 2.45E-05    | -0.29867945  |
| ENSMUSG00000023495 | Pcbp4         | 0.001864913 | -0.298859365 |
| ENSMUSG00000020420 | Zfp607a       | 0.008390471 | -0.299499889 |

|                     |          |             |              |
|---------------------|----------|-------------|--------------|
| ENSMUSG00000078903  | Gm14391  | 0.033028366 | -0.29960694  |
| ENSMUSG00000038459  | Abhd17c  | 9.49E-07    | -0.299626394 |
| ENSMUSG00000002797  | Ggct     | 0.030872248 | -0.299664644 |
| ENSMUSG00000025076  | Casp7    | 0.008988149 | -0.29992231  |
| ENSMUSG00000017057  | Il13ra1  | 0.035776527 | -0.300025184 |
| ENSMUSG00000029591  | Ung      | 0.004224934 | -0.300048882 |
| ENSMUSG00000014633  | Cmc2     | 0.00400602  | -0.300050924 |
| ENSMUSG00000024997  | Prdx3    | 1.87E-06    | -0.300094275 |
| ENSMUSG00000022013  | Dnajc15  | 0.030135142 | -0.300630749 |
| ENSMUSG00000041935  | AW549877 | 0.046085045 | -0.30084311  |
| ENSMUSG00000062981  | Mrpl42   | 4.69E-06    | -0.301076812 |
| ENSMUSG00000074211  | Sdhaf1   | 0.000315983 | -0.30111777  |
| ENSMUSG00000032633  | Flcn     | 5.85E-06    | -0.301319988 |
| ENSMUSG00000025812  | Pard3    | 0.000360587 | -0.301373141 |
| ENSMUSG00000002059  | Rab34    | 5.59E-07    | -0.301482029 |
| ENSMUSG00000041483  | Zfp281   | 0.000766899 | -0.30148798  |
| ENSMUSG00000005510  | Ndufs3   | 9.13E-06    | -0.301863218 |
| ENSMUSG000000111727 | Ndufs3   | 9.13E-06    | -0.301863218 |
| ENSMUSG00000028525  | Pde4b    | 0.020973242 | -0.302696398 |
| ENSMUSG00000063200  | Nol7     | 0.009822625 | -0.303270039 |
| ENSMUSG00000004044  | Cavin1   | 3.12E-05    | -0.304188972 |
| ENSMUSG00000024981  | Acsl5    | 0.001776197 | -0.304336703 |
| ENSMUSG00000029128  | Rab28    | 7.91E-05    | -0.304538969 |
| ENSMUSG00000060152  | Pop5     | 0.002128521 | -0.305172673 |
| ENSMUSG00000026853  | Crat     | 0.00038042  | -0.305206328 |
| ENSMUSG00000026604  | Ptpn14   | 2.24E-06    | -0.305242349 |
| ENSMUSG00000071722  | Spin4    | 0.023821331 | -0.305848037 |
| ENSMUSG00000036249  | Rbm43    | 0.000261288 | -0.306552581 |
| ENSMUSG00000031355  | Arhgap6  | 0.000402033 | -0.30721276  |
| ENSMUSG00000039058  | Ak5      | 0.003756738 | -0.307490542 |
| ENSMUSG00000000171  | Sdhd     | 1.13E-07    | -0.307798709 |
| ENSMUSG00000024101  | Washc1   | 0.001446519 | -0.307896598 |
| ENSMUSG00000024589  | Nedd4l   | 8.97E-06    | -0.308133357 |
| ENSMUSG00000005674  | Tomm40l  | 0.000149502 | -0.308617664 |
| ENSMUSG00000032251  | Irak1bp1 | 9.58E-05    | -0.309497263 |
| ENSMUSG00000015839  | Nfe2l2   | 0.022454426 | -0.310623664 |
| ENSMUSG00000031782  | Coq9     | 0.003307898 | -0.310631352 |
| ENSMUSG00000026003  | Acadl    | 1.42E-07    | -0.311362967 |
| ENSMUSG00000041560  | Nop53    | 0.000157159 | -0.311520137 |
| ENSMUSG00000022139  | Mbnl2    | 2.81E-07    | -0.311568661 |
| ENSMUSG00000026687  | Aldh9a1  | 2.71E-06    | -0.312338496 |
| ENSMUSG00000030872  | Gga2     | 7.16E-07    | -0.312450233 |
| ENSMUSG00000029178  | Klf3     | 0.046428321 | -0.312795181 |
| ENSMUSG00000009995  | Taz      | 0.026555288 | -0.31302886  |
| ENSMUSG00000035992  | Fnip1    | 2.95E-07    | -0.313048382 |
| ENSMUSG00000078920  | Ifi47    | 0.017350017 | -0.313274767 |
| ENSMUSG00000083380  | Gm3244   | 0.000154026 | -0.313390013 |



|                     |               |             |              |
|---------------------|---------------|-------------|--------------|
| ENSMUSG00000022283  | Pabpc1        | 6.13E-08    | -0.31364508  |
| ENSMUSG00000068264  | Ap5s1         | 0.002764775 | -0.313918504 |
| ENSMUSG00000027692  | Tnik          | 0.043824221 | -0.314007725 |
| ENSMUSG00000043398  | Gpr135        | 0.000426178 | -0.314487428 |
| ENSMUSG00000035595  | 1600002K03Rik | 0.008442014 | -0.314791312 |
| ENSMUSG00000027423  | Snx5          | 1.24E-05    | -0.314919004 |
| ENSMUSG00000026179  | Pnkd          | 5.49E-05    | -0.314943991 |
| ENSMUSG00000079003  | Samd1         | 0.007278832 | -0.315303492 |
| ENSMUSG00000006315  | Tmem147       | 8.90E-08    | -0.31559631  |
| ENSMUSG00000032508  | Myd88         | 7.93E-06    | -0.315999788 |
| ENSMUSG00000015806  | Qdpr          | 2.30E-06    | -0.316012566 |
| ENSMUSG00000020163  | Uqcr11        | 0.000104946 | -0.31641815  |
| ENSMUSG00000028675  | Pnrc2         | 6.11E-05    | -0.317356098 |
| ENSMUSG00000041453  | Rpl21         | 5.74E-08    | -0.317640125 |
| ENSMUSG00000056216  | Cebpg         | 0.000282007 | -0.317693489 |
| ENSMUSG00000021669  | Col4a3bp      | 1.67E-05    | -0.318020335 |
| ENSMUSG00000014850  | Msh3          | 0.004063574 | -0.318170157 |
| ENSMUSG00000005951  | Shpk          | 0.009214718 | -0.319041649 |
| ENSMUSG00000032567  | Aste1         | 0.017129143 | -0.320759325 |
| ENSMUSG00000040548  | Tex2          | 0.000139646 | -0.320931357 |
| ENSMUSG000000057554 | Lgals8        | 3.81E-07    | -0.321281749 |
| ENSMUSG000000051184 | Zfp524        | 0.003861279 | -0.321530826 |
| ENSMUSG000000034353 | Ramp1         | 0.04691763  | -0.321864157 |
| ENSMUSG000000081485 | Gm12338       | 0.001945281 | -0.322256225 |
| ENSMUSG000000026283 | Ing5          | 6.84E-05    | -0.322525775 |
| ENSMUSG000000030681 | Mvp           | 0.003843689 | -0.323117009 |
| ENSMUSG000000008435 | Rdh13         | 0.002605831 | -0.323816141 |
| ENSMUSG000000047881 | Rell1         | 0.012735017 | -0.323875749 |
| ENSMUSG000000020715 | Ern1          | 6.15E-06    | -0.323922849 |
| ENSMUSG000000050910 | Cdr2l         | 4.50E-08    | -0.324164624 |
| ENSMUSG000000035011 | Zbtb7a        | 1.33E-05    | -0.324489236 |
| ENSMUSG000000025795 | Rassf3        | 0.004756162 | -0.324591688 |
| ENSMUSG000000070394 | Tmem256       | 2.12E-06    | -0.324823488 |
| ENSMUSG000000040414 | Slc25a28      | 2.97E-05    | -0.324865217 |
| ENSMUSG000000025533 | Asl           | 3.19E-06    | -0.325466877 |
| ENSMUSG000000024962 | Vegfb         | 2.05E-06    | -0.325890777 |
| ENSMUSG00000007036  | Abhd16a       | 0.000453396 | -0.32595335  |
| ENSMUSG000000029762 | Akr1b8        | 0.00011134  | -0.326227943 |
| ENSMUSG000000040370 | Etfrf1        | 0.00562415  | -0.326350508 |
| ENSMUSG000000030695 | Aldoa         | 2.04E-07    | -0.326610876 |
| ENSMUSG00000004880  | Lbr           | 0.000939604 | -0.327140003 |
| ENSMUSG000000039005 | Tlr4          | 0.002666506 | -0.327685469 |
| ENSMUSG000000078864 | Gm14322       | 0.036699156 | -0.327984134 |
| ENSMUSG000000015522 | Arnt          | 3.13E-05    | -0.328001988 |
| ENSMUSG000000032827 | Ppp1r9a       | 0.048612208 | -0.328101126 |
| ENSMUSG000000033475 | Tomm6         | 2.17E-08    | -0.328348023 |
| ENSMUSG000000055013 | Agap1         | 1.78E-06    | -0.328738836 |

|                    |             |             |              |
|--------------------|-------------|-------------|--------------|
| ENSMUSG00000063488 | Zkscan7     | 0.040219585 | -0.328887975 |
| ENSMUSG00000070572 | Trmt112-ps2 | 0.002160607 | -0.329148262 |
| ENSMUSG00000032046 | Abhd12      | 3.78E-08    | -0.329519106 |
| ENSMUSG00000026958 | Dpp7        | 2.82E-06    | -0.329738646 |
| ENSMUSG00000062683 | Atp5g2      | 0.025050939 | -0.329842764 |
| ENSMUSG00000074384 | Al429214    | 0.025448856 | -0.330667847 |
| ENSMUSG0000002395  | Use1        | 9.45E-06    | -0.330756623 |
| ENSMUSG00000024188 | Luc7l       | 2.12E-07    | -0.331372585 |
| ENSMUSG00000004069 | Dnaja3      | 7.33E-07    | -0.331442616 |
| ENSMUSG00000045817 | Zfp36l2     | 0.003588168 | -0.331580222 |
| ENSMUSG00000072612 | Gm10382     | 0.034752762 | -0.33215953  |
| ENSMUSG00000022898 | Dscr3       | 0.015306245 | -0.332613645 |
| ENSMUSG00000061665 | Cd2ap       | 0.006442752 | -0.332844788 |
| ENSMUSG00000042870 | Tom1        | 0.000431498 | -0.333381363 |
| ENSMUSG00000032092 | Mpzl2       | 8.52E-05    | -0.334074855 |
| ENSMUSG00000031732 | Phlpp2      | 0.00194877  | -0.334337555 |
| ENSMUSG00000022223 | Sdr39u1     | 0.000459744 | -0.334747428 |
| ENSMUSG00000020376 | Rnf130      | 0.042179004 | -0.334895862 |
| ENSMUSG00000078572 | Ndufaf8     | 0.008746046 | -0.335345121 |
| ENSMUSG00000041199 | Rpusd1      | 6.62E-05    | -0.335542184 |
| ENSMUSG00000024835 | Coro1b      | 0.043563724 | -0.335563442 |
| ENSMUSG00000097771 | Coro1b      | 0.043563724 | -0.335563442 |
| ENSMUSG00000050627 | Gpd1l       | 0.000191295 | -0.335657878 |
| ENSMUSG00000038539 | Atf5        | 0.013660386 | -0.335930495 |
| ENSMUSG00000044408 | Sptssa      | 2.38E-06    | -0.336269886 |
| ENSMUSG00000073557 | Ppp1r12b    | 3.37E-05    | -0.336343057 |
| ENSMUSG00000026361 | Cdc73       | 2.14E-07    | -0.336725317 |
| ENSMUSG00000053329 | D10Jhu81e   | 0.007653063 | -0.336872324 |
| ENSMUSG00000033429 | Mcee        | 0.027013693 | -0.33883751  |
| ENSMUSG00000045629 | Sh3tc2      | 6.80E-06    | -0.338988675 |
| ENSMUSG00000027984 | Hadh        | 2.74E-08    | -0.339107421 |
| ENSMUSG00000004455 | Ppp1cc      | 3.65E-08    | -0.339506138 |
| ENSMUSG00000027953 | Slc50a1     | 1.84E-05    | -0.339664788 |
| ENSMUSG00000015652 | Steap1      | 0.011333845 | -0.339963643 |
| ENSMUSG00000048967 | Yjefn3      | 0.016464397 | -0.340135442 |
| ENSMUSG00000028957 | Per3        | 0.029213402 | -0.34016369  |
| ENSMUSG00000058997 | Vwa8        | 0.000864839 | -0.340193836 |
| ENSMUSG00000027679 | Dnajc19     | 0.000137379 | -0.340469093 |
| ENSMUSG00000039208 | Metrl       | 0.001034485 | -0.340550409 |
| ENSMUSG00000003228 | Grk5        | 8.23E-05    | -0.340623538 |
| ENSMUSG00000054452 | Aes         | 1.26E-05    | -0.341000282 |
| ENSMUSG00000032040 | Dcps        | 6.91E-06    | -0.341287582 |
| ENSMUSG00000029208 | Guf1        | 4.19E-05    | -0.341298993 |
| ENSMUSG00000022610 | Mapk12      | 8.38E-05    | -0.341477618 |
| ENSMUSG00000024253 | Dync2li1    | 7.18E-06    | -0.341716794 |
| ENSMUSG00000050608 | Minos1      | 1.92E-06    | -0.34256126  |
| ENSMUSG00000018932 | Map2k3      | 5.52E-07    | -0.342769811 |

|                    |          |             |              |
|--------------------|----------|-------------|--------------|
| ENSMUSG00000037112 | Sik2     | 0.000110741 | -0.34290984  |
| ENSMUSG00000061838 | Suc1g2   | 9.13E-07    | -0.343158422 |
| ENSMUSG00000037960 | Card19   | 9.48E-07    | -0.343190574 |
| ENSMUSG00000110720 | Gm46223  | 0.001313114 | -0.343584215 |
| ENSMUSG00000024206 | Rfx2     | 0.01667262  | -0.343612816 |
| ENSMUSG00000040269 | Mrps28   | 0.001317908 | -0.343825282 |
| ENSMUSG00000020375 | Rufy1    | 0.00110918  | -0.343996463 |
| ENSMUSG00000021752 | Kctd6    | 0.000785667 | -0.344207041 |
| ENSMUSG00000038085 | Cnbd2    | 0.000423059 | -0.345673875 |
| ENSMUSG00000030614 | Tmem126b | 0.00979835  | -0.346003178 |
| ENSMUSG00000042032 | Mat2b    | 0.000399511 | -0.346551387 |
| ENSMUSG00000058076 | Sdhc     | 9.37E-09    | -0.346757749 |
| ENSMUSG00000040033 | Stat2    | 0.005618708 | -0.347120305 |
| ENSMUSG00000036138 | Acaa1a   | 0.000272078 | -0.348028561 |
| ENSMUSG00000020919 | Stat5b   | 0.002809383 | -0.348337432 |
| ENSMUSG00000052139 | Babam2   | 0.00063356  | -0.348349814 |
| ENSMUSG00000020069 | Hnrnph3  | 1.18E-05    | -0.34865687  |
| ENSMUSG00000045659 | Plekha7  | 0.004645826 | -0.34915344  |
| ENSMUSG00000037628 | Cdkn3    | 0.038557257 | -0.349225885 |
| ENSMUSG00000033793 | Atp6v1h  | 9.20E-10    | -0.35043622  |
| ENSMUSG00000027406 | Idh3b    | 1.26E-09    | -0.350614297 |
| ENSMUSG00000020829 | Slc46a1  | 4.25E-05    | -0.351219072 |
| ENSMUSG00000062309 | Rpp25    | 0.032509855 | -0.351618506 |
| ENSMUSG00000016252 | Atp5e    | 1.87E-09    | -0.351793171 |
| ENSMUSG00000025351 | Cd63     | 2.33E-08    | -0.351817462 |
| ENSMUSG00000040429 | Mterf1a  | 0.017693784 | -0.352191622 |
| ENSMUSG00000039308 | Ndst2    | 0.012086527 | -0.352213322 |
| ENSMUSG00000034566 | Atp5h    | 9.06E-10    | -0.352590733 |
| ENSMUSG00000028085 | Gatb     | 0.040168247 | -0.353113352 |
| ENSMUSG00000022956 | Atp5o    | 1.21E-08    | -0.353513356 |
| ENSMUSG00000029684 | Wasl     | 0.000828288 | -0.353540598 |
| ENSMUSG00000024193 | Phf1     | 0.000426178 | -0.354034694 |
| ENSMUSG00000039849 | Pcif1    | 0.000124158 | -0.354122575 |
| ENSMUSG00000026088 | Mitd1    | 5.27E-05    | -0.354749936 |
| ENSMUSG00000044934 | Zfp367   | 0.000250044 | -0.355323089 |
| ENSMUSG00000021460 | Auh      | 0.041524164 | -0.356362896 |
| ENSMUSG00000036718 | Micall2  | 1.58E-05    | -0.356374736 |
| ENSMUSG00000027430 | Dtd1     | 0.003993625 | -0.356691509 |
| ENSMUSG00000034998 | Foxn2    | 2.73E-05    | -0.357218943 |
| ENSMUSG00000031134 | Rbmx     | 0.004177034 | -0.357590453 |
| ENSMUSG00000025781 | Atp5c1   | 3.07E-10    | -0.357656202 |
| ENSMUSG00000020022 | Ndufa12  | 2.17E-08    | -0.358162427 |
| ENSMUSG00000056498 | Tmem154  | 0.003843689 | -0.35859176  |
| ENSMUSG00000040746 | Rnf167   | 0.010318346 | -0.359048798 |
| ENSMUSG00000054263 | Lifr     | 0.038958902 | -0.359624123 |
| ENSMUSG00000091803 | Cox16    | 2.00E-05    | -0.359944985 |
| ENSMUSG00000027109 | Sp3      | 0.000745382 | -0.360169594 |

|                    |          |             |              |
|--------------------|----------|-------------|--------------|
| ENSMUSG0000002227  | Mov10    | 0.046319275 | -0.360340614 |
| ENSMUSG00000060126 | Tpt1     | 3.29E-05    | -0.360601844 |
| ENSMUSG00000024246 | Thumpd2  | 0.036209751 | -0.360665796 |
| ENSMUSG00000091577 | Gm6211   | 0.039701669 | -0.361103334 |
| ENSMUSG00000033885 | Pxk      | 1.66E-07    | -0.361195799 |
| ENSMUSG00000013622 | Atraid   | 0.000396541 | -0.361212106 |
| ENSMUSG00000031604 | Msmo1    | 0.008348432 | -0.361462539 |
| ENSMUSG00000018372 | Cep95    | 0.013578642 | -0.361924869 |
| ENSMUSG00000073609 | D2hgdh   | 0.006453832 | -0.362463937 |
| ENSMUSG00000045257 | Morn2    | 0.004784514 | -0.36257383  |
| ENSMUSG00000021775 | Nr1d2    | 0.025485808 | -0.362876628 |
| ENSMUSG00000025193 | Cutc     | 0.002158475 | -0.363460195 |
| ENSMUSG00000018509 | Cenpv    | 0.000554188 | -0.364231799 |
| ENSMUSG00000084319 | Tpt1-ps3 | 1.51E-06    | -0.364719307 |
| ENSMUSG00000028974 | Dffa     | 0.003576193 | -0.364750142 |
| ENSMUSG00000028559 | Osblp9   | 0.000663148 | -0.364882597 |
| ENSMUSG00000032271 | Nnmt     | 2.24E-06    | -0.365029238 |
| ENSMUSG00000004270 | Lpcat3   | 5.12E-07    | -0.365186071 |
| ENSMUSG00000018428 | Akap1    | 0.039663456 | -0.36608073  |
| ENSMUSG00000036880 | Acaa2    | 0.00804738  | -0.366461635 |
| ENSMUSG00000019528 | Gyg      | 0.045615812 | -0.366709921 |
| ENSMUSG00000039873 | Neurl2   | 0.031865588 | -0.366941666 |
| ENSMUSG00000032584 | Mst1r    | 0.003576193 | -0.366993203 |
| ENSMUSG00000028648 | Ndufs5   | 2.42E-06    | -0.367769997 |
| ENSMUSG00000035673 | Sbno2    | 0.001019067 | -0.367994894 |
| ENSMUSG00000044894 | Uqcrq    | 3.40E-10    | -0.368620038 |
| ENSMUSG00000037499 | Nenf     | 8.76E-05    | -0.368790733 |
| ENSMUSG00000063268 | Parp10   | 0.001696647 | -0.369179266 |
| ENSMUSG00000046675 | Tmem251  | 0.000910509 | -0.369618257 |
| ENSMUSG00000037979 | Ccdc92   | 0.000156956 | -0.369701725 |
| ENSMUSG00000022450 | Ndufa6   | 0.000282468 | -0.370134396 |
| ENSMUSG00000002688 | Prkd1    | 0.000614905 | -0.371250975 |
| ENSMUSG00000003200 | Sh3gl1   | 1.04E-10    | -0.371609708 |
| ENSMUSG00000024038 | Ndufv3   | 9.02E-09    | -0.371933777 |
| ENSMUSG00000040219 | Ttc12    | 0.002456645 | -0.372763228 |
| ENSMUSG00000080893 | Gm15920  | 6.41E-07    | -0.372919949 |
| ENSMUSG00000061518 | Cox5b    | 5.39E-10    | -0.373864596 |
| ENSMUSG00000025521 | Tmem192  | 9.07E-08    | -0.374085805 |
| ENSMUSG00000044068 | Zrsr1    | 0.00024502  | -0.374475717 |
| ENSMUSG00000039715 | Wdr34    | 0.002774412 | -0.374506048 |
| ENSMUSG00000025937 | Lactb2   | 0.005861379 | -0.374588964 |
| ENSMUSG00000020387 | Jade2    | 0.002213807 | -0.374838529 |
| ENSMUSG00000032314 | Etfa     | 6.66E-10    | -0.375321446 |
| ENSMUSG00000019917 | 10-Sep   | 6.37E-08    | -0.37555627  |
| ENSMUSG00000025428 | Atp5a1   | 1.36E-11    | -0.375584741 |
| ENSMUSG00000116276 | Atp5a1   | 1.36E-11    | -0.375584741 |
| ENSMUSG00000027215 | Cd82     | 0.035996805 | -0.376051193 |

|                    |               |             |              |
|--------------------|---------------|-------------|--------------|
| ENSMUSG00000030220 | Arhgdib       | 2.76E-11    | -0.376423629 |
| ENSMUSG00000010095 | Slc3a2        | 6.70E-11    | -0.376438239 |
| ENSMUSG00000037126 | Psd           | 0.00350275  | -0.376511734 |
| ENSMUSG00000017718 | Afmid         | 0.024639585 | -0.376577168 |
| ENSMUSG00000005774 | Rfx5          | 0.005771818 | -0.376772686 |
| ENSMUSG00000037325 | Bbs7          | 0.005779919 | -0.376933573 |
| ENSMUSG00000039982 | Dtx4          | 1.36E-10    | -0.377653455 |
| ENSMUSG00000043411 | Usp48         | 0.04691763  | -0.37789338  |
| ENSMUSG00000017176 | Nt5c3b        | 0.008210169 | -0.378253785 |
| ENSMUSG00000025950 | ldh1          | 1.26E-05    | -0.378831767 |
| ENSMUSG00000032238 | Rora          | 0.044163235 | -0.379068192 |
| ENSMUSG00000090523 | Gypc          | 0.000732128 | -0.379346582 |
| ENSMUSG00000026176 | Ctdsp1        | 2.42E-06    | -0.379529889 |
| ENSMUSG00000026594 | Ralgps2       | 0.007301922 | -0.37971677  |
| ENSMUSG00000042105 | Inpp5f        | 0.000131986 | -0.379865581 |
| ENSMUSG00000029201 | Ugdh          | 0.0009931   | -0.379972035 |
| ENSMUSG00000033249 | Hsf4          | 0.000193152 | -0.380428304 |
| ENSMUSG00000045790 | Ccdc149       | 0.032414565 | -0.380672626 |
| ENSMUSG00000030074 | Gxylt2        | 0.026883448 | -0.381250099 |
| ENSMUSG00000078921 | Tgtp2         | 0.019277842 | -0.381393025 |
| ENSMUSG00000021939 | Ctsb          | 0.00055027  | -0.381641063 |
| ENSMUSG00000026896 | Ifih1         | 0.011266916 | -0.38191602  |
| ENSMUSG00000040466 | Blvrb         | 0.000468439 | -0.382198664 |
| ENSMUSG00000029162 | Khk           | 0.000665022 | -0.382260515 |
| ENSMUSG00000033863 | Klf9          | 0.003604734 | -0.383025459 |
| ENSMUSG00000026309 | Ilkap         | 1.72E-07    | -0.383616758 |
| ENSMUSG00000026004 | Kansl1l       | 4.38E-06    | -0.383891062 |
| ENSMUSG00000038893 | Fam117a       | 0.044951065 | -0.384168178 |
| ENSMUSG00000024843 | Chka          | 0.026938392 | -0.38485791  |
| ENSMUSG00000019943 | Atp2b1        | 1.13E-06    | -0.384930434 |
| ENSMUSG00000063810 | Alms1         | 0.000579724 | -0.385100765 |
| ENSMUSG00000050014 | Apol10b       | 7.98E-08    | -0.385139258 |
| ENSMUSG00000087408 | Cers1         | 0.000347103 | -0.385793078 |
| ENSMUSG00000021367 | Edn1          | 1.39E-05    | -0.386713502 |
| ENSMUSG00000034875 | Nudt19        | 0.001036153 | -0.386771708 |
| ENSMUSG00000030279 | C2cd5         | 0.002417364 | -0.387265655 |
| ENSMUSG00000058706 | 0610030E20Rik | 0.00042026  | -0.387318596 |
| ENSMUSG00000108680 | 0610030E20Rik | 0.00042026  | -0.387318596 |
| ENSMUSG00000035561 | Aldh1b1       | 0.030625938 | -0.387646594 |
| ENSMUSG00000052821 | Cysltr1       | 0.00218446  | -0.387847818 |
| ENSMUSG00000042195 | Slc35f2       | 0.034894183 | -0.388755659 |
| ENSMUSG00000000552 | Zfp385a       | 7.21E-05    | -0.388787835 |
| ENSMUSG00000055866 | Per2          | 0.001875213 | -0.388959774 |
| ENSMUSG00000029815 | Malsu1        | 0.000251219 | -0.389412546 |
| ENSMUSG00000029432 | Nipsnap2      | 3.18E-08    | -0.389515903 |
| ENSMUSG00000057531 | Dtnbp1        | 1.17E-10    | -0.389929675 |
| ENSMUSG00000024425 | Ndfip1        | 0.005533269 | -0.390139785 |

|                    |               |             |              |
|--------------------|---------------|-------------|--------------|
| ENSMUSG00000027605 | Acss2         | 0.005187742 | -0.390211934 |
| ENSMUSG00000093930 | Hmgcs1        | 0.034657362 | -0.390695754 |
| ENSMUSG00000028672 | Hmgcl         | 0.000451056 | -0.391164703 |
| ENSMUSG00000021520 | Uqcrb         | 1.52E-11    | -0.391358115 |
| ENSMUSG00000040913 | Fbxw4         | 0.001010389 | -0.391433901 |
| ENSMUSG00000022354 | Ndufb9        | 5.77E-12    | -0.392027902 |
| ENSMUSG00000015647 | Lama5         | 0.006631023 | -0.392304113 |
| ENSMUSG00000037523 | Mavs          | 0.004607692 | -0.392670842 |
| ENSMUSG00000020937 | Plcd3         | 0.015272157 | -0.394425511 |
| ENSMUSG00000032788 | Pdxk          | 9.79E-07    | -0.394522682 |
| ENSMUSG00000027673 | Ndufb5        | 4.76E-11    | -0.395151684 |
| ENSMUSG00000008734 | Gprc5b        | 0.000734342 | -0.395842203 |
| ENSMUSG00000064105 | Cnm2          | 0.001467519 | -0.396064125 |
| ENSMUSG00000062054 | Iah1          | 0.000696454 | -0.396983897 |
| ENSMUSG00000045316 | Fahd1         | 2.01E-06    | -0.39704362  |
| ENSMUSG00000018752 | Tnfsfm13      | 0.002446266 | -0.398181036 |
| ENSMUSG00000040957 | Cables1       | 1.39E-07    | -0.398805385 |
| ENSMUSG00000067825 | Pex26         | 0.003038146 | -0.399451838 |
| ENSMUSG00000037395 | Rcor3         | 5.75E-05    | -0.400616052 |
| ENSMUSG00000111452 | Rcor3         | 5.75E-05    | -0.400616052 |
| ENSMUSG00000039246 | Lyp1a1        | 1.23E-05    | -0.400762719 |
| ENSMUSG00000021025 | Nfkb1a        | 0.020455399 | -0.401949142 |
| ENSMUSG00000078429 | Ctdsp2        | 0.015673048 | -0.40198543  |
| ENSMUSG00000030281 | Il17rc        | 0.018653075 | -0.402139411 |
| ENSMUSG00000024713 | Pcsk5         | 0.000369576 | -0.402154113 |
| ENSMUSG00000046727 | Cystm1        | 3.25E-07    | -0.402212197 |
| ENSMUSG00000038208 | Pgap3         | 0.003082862 | -0.402284177 |
| ENSMUSG00000078919 | Dpm1          | 0.001945281 | -0.402485    |
| ENSMUSG00000041488 | Stx3          | 9.79E-08    | -0.402760669 |
| ENSMUSG00000002265 | Peg3          | 0.009694946 | -0.403211659 |
| ENSMUSG00000075706 | Gpx4          | 0.00097027  | -0.403236042 |
| ENSMUSG00000071757 | Zhx2          | 0.000216153 | -0.403312295 |
| ENSMUSG00000041921 | Metap1d       | 0.007461817 | -0.403813788 |
| ENSMUSG00000033161 | Atp1a1        | 2.44E-13    | -0.404126223 |
| ENSMUSG00000031059 | Ndufb11       | 7.04E-12    | -0.404918302 |
| ENSMUSG00000035885 | Cox8a         | 1.50E-07    | -0.405055382 |
| ENSMUSG00000026500 | Cox20         | 1.22E-05    | -0.405075134 |
| ENSMUSG00000111742 | Cox20         | 1.22E-05    | -0.405075134 |
| ENSMUSG00000009376 | Met           | 0.008895962 | -0.405110459 |
| ENSMUSG00000066443 | Gm10163       | 0.044971776 | -0.405145244 |
| ENSMUSG00000023961 | Enpp4         | 1.42E-09    | -0.405305656 |
| ENSMUSG00000030155 | Clec2e        | 0.036911096 | -0.405868705 |
| ENSMUSG00000019302 | Atp6v0a1      | 0.000907971 | -0.407230708 |
| ENSMUSG00000029673 | Auts2         | 0.000154824 | -0.407482603 |
| ENSMUSG00000032398 | Snpc5         | 0.000123737 | -0.407821565 |
| ENSMUSG00000020439 | Smtn          | 9.24E-12    | -0.408383245 |
| ENSMUSG00000019797 | 1700021F05Rik | 1.10E-07    | -0.40886147  |

|                     |          |             |              |
|---------------------|----------|-------------|--------------|
| ENSMUSG00000046718  | Bst2     | 0.00364423  | -0.409137528 |
| ENSMUSG00000029993  | Nfu1     | 1.46E-07    | -0.409289235 |
| ENSMUSG00000031292  | Cdkl5    | 0.024248976 | -0.409616547 |
| ENSMUSG00000021474  | Sfxn1    | 5.10E-12    | -0.411485027 |
| ENSMUSG00000055912  | Tmem150a | 0.000759921 | -0.412041362 |
| ENSMUSG00000102455  | Tmem150a | 0.000759921 | -0.412041362 |
| ENSMUSG00000024856  | Cdk2ap2  | 0.034100474 | -0.412540147 |
| ENSMUSG00000097485  | Cdk2ap2  | 0.034100474 | -0.412540147 |
| ENSMUSG00000030102  | ltp1     | 0.035776527 | -0.412655636 |
| ENSMUSG00000020955  | Ap4s1    | 1.84E-05    | -0.413086715 |
| ENSMUSG00000054871  | Tmem158  | 0.019633383 | -0.413608088 |
| ENSMUSG00000026456  | Cyb5r1   | 0.000271736 | -0.413826476 |
| ENSMUSG00000019966  | Kitl     | 0.043660219 | -0.413970428 |
| ENSMUSG00000002825  | Qtrt1    | 0.001710713 | -0.414431576 |
| ENSMUSG00000073700  | Klhl21   | 2.90E-06    | -0.415169977 |
| ENSMUSG00000042737  | Dpm3     | 1.04E-08    | -0.415732679 |
| ENSMUSG00000020889  | Nr1d1    | 0.000443082 | -0.416033274 |
| ENSMUSG000000028124 | Gclm     | 1.77E-07    | -0.416102571 |
| ENSMUSG00000004043  | Stat5a   | 7.03E-05    | -0.41616949  |
| ENSMUSG00000112644  | Gm47220  | 0.021270945 | -0.416280161 |
| ENSMUSG00000004040  | Stat3    | 0.015745334 | -0.417214782 |
| ENSMUSG00000056209  | Npm3     | 6.59E-10    | -0.417681778 |
| ENSMUSG000000020153 | Ndufs7   | 5.78E-11    | -0.417914073 |
| ENSMUSG00000037573  | Tob1     | 0.011162357 | -0.418176527 |
| ENSMUSG00000042686  | Jph1     | 3.37E-08    | -0.41862381  |
| ENSMUSG00000038886  | Man2a2   | 0.00088854  | -0.418957542 |
| ENSMUSG00000116235  | Trerf1   | 0.000233707 | -0.419492134 |
| ENSMUSG00000042962  | Gm5436   | 0.034069382 | -0.419857623 |
| ENSMUSG00000071451  | Psmg4    | 8.27E-06    | -0.420492268 |
| ENSMUSG00000017760  | Ctsa     | 0.013260515 | -0.42117546  |
| ENSMUSG00000002661  | Alkbh7   | 6.84E-05    | -0.42211548  |
| ENSMUSG00000017466  | Timp2    | 0.001804241 | -0.42338992  |
| ENSMUSG00000035376  | Hacd2    | 1.25E-10    | -0.424109108 |
| ENSMUSG00000079511  | Gm42688  | 0.009260501 | -0.424434527 |
| ENSMUSG00000002803  | Btbd6    | 0.040221432 | -0.42476508  |
| ENSMUSG00000032370  | Lactb    | 5.34E-05    | -0.424854036 |
| ENSMUSG00000040532  | Abhd11   | 3.74E-09    | -0.42552102  |
| ENSMUSG00000021385  | lppk     | 3.31E-06    | -0.425642459 |
| ENSMUSG00000031387  | Renbp    | 2.30E-13    | -0.425978571 |
| ENSMUSG00000022957  | ltsn1    | 0.031265914 | -0.42657897  |
| ENSMUSG00000034993  | Vat1     | 2.43E-11    | -0.426716636 |
| ENSMUSG00000023861  | Mpc1     | 2.64E-07    | -0.426887688 |
| ENSMUSG00000054428  | Atpif1   | 3.32E-06    | -0.427345059 |
| ENSMUSG00000002020  | Ltbp2    | 0.00308423  | -0.428047018 |
| ENSMUSG00000031627  | lrf2     | 0.001726699 | -0.428460286 |
| ENSMUSG00000022516  | Nudt16l1 | 2.43E-07    | -0.428629478 |
| ENSMUSG00000040883  | Tmem205  | 0.01678827  | -0.430509013 |

|                    |            |             |              |
|--------------------|------------|-------------|--------------|
| ENSMUSG00000046589 | Lrrc8e     | 0.022866948 | -0.431744987 |
| ENSMUSG00000032245 | Cln6       | 0.040973792 | -0.432143886 |
| ENSMUSG00000000563 | Atp5f1     | 6.81E-15    | -0.432519536 |
| ENSMUSG00000029999 | Tgfa       | 0.003458096 | -0.435473304 |
| ENSMUSG00000059534 | Uqcr10     | 7.11E-09    | -0.43580038  |
| ENSMUSG00000035048 | Anapc13    | 8.75E-06    | -0.435988016 |
| ENSMUSG00000029640 | Usp12      | 3.01E-05    | -0.436012023 |
| ENSMUSG00000042042 | Csgalnact2 | 2.42E-12    | -0.436333408 |
| ENSMUSG00000025785 | Exosc7     | 3.17E-07    | -0.436407983 |
| ENSMUSG00000056124 | B4galt6    | 0.0019439   | -0.436919821 |
| ENSMUSG00000059495 | Arhgef12   | 0.000477679 | -0.438198737 |
| ENSMUSG00000039428 | Tmem135    | 1.20E-06    | -0.438671341 |
| ENSMUSG00000037287 | Tbcel      | 0.005525722 | -0.43930333  |
| ENSMUSG00000044080 | S100a1     | 1.01E-06    | -0.439471073 |
| ENSMUSG00000025545 | Clybl      | 2.34E-05    | -0.439640324 |
| ENSMUSG00000066724 | Gm10175    | 2.50E-14    | -0.439996791 |
| ENSMUSG00000025190 | Got1       | 5.77E-13    | -0.440799595 |
| ENSMUSG00000006818 | Sod2       | 1.47E-12    | -0.441077067 |
| ENSMUSG00000039197 | Adk        | 1.07E-09    | -0.441486861 |
| ENSMUSG00000026200 | Glb1l      | 0.00047009  | -0.442012089 |
| ENSMUSG00000020534 | Shmt1      | 0.000101814 | -0.442298624 |
| ENSMUSG00000035891 | Cerk       | 5.19E-05    | -0.442394212 |
| ENSMUSG00000021866 | Anxa11     | 6.95E-07    | -0.442501261 |
| ENSMUSG00000061778 | Mospd2     | 1.80E-09    | -0.443628115 |
| ENSMUSG00000023075 | Akirin1    | 3.49E-06    | -0.444688061 |
| ENSMUSG00000026279 | Thap4      | 1.64E-06    | -0.444924586 |
| ENSMUSG00000025105 | Bnc1       | 0.024517813 | -0.445139736 |
| ENSMUSG00000024132 | Eci1       | 2.70E-06    | -0.445371867 |
| ENSMUSG00000026988 | Wdsub1     | 0.014474124 | -0.44576513  |
| ENSMUSG00000054499 | Dedd2      | 0.015551395 | -0.445995896 |
| ENSMUSG00000032688 | Malt1      | 1.86E-06    | -0.446932366 |
| ENSMUSG00000031438 | Rnf128     | 2.22E-06    | -0.447035466 |
| ENSMUSG00000038650 | Rnh1       | 1.90E-15    | -0.447084851 |
| ENSMUSG00000036109 | Mbnl3      | 0.00264634  | -0.447617271 |
| ENSMUSG00000045038 | Prkce      | 0.000418503 | -0.447773584 |
| ENSMUSG00000010358 | Ifi35      | 4.54E-05    | -0.447900936 |
| ENSMUSG00000041945 | Mfsd9      | 0.030800362 | -0.448172898 |
| ENSMUSG00000021482 | Aaed1      | 0.002516581 | -0.448528848 |
| ENSMUSG00000006289 | Osgep      | 0.037361124 | -0.448596656 |
| ENSMUSG00000021242 | Npc2       | 1.34E-10    | -0.448776526 |
| ENSMUSG00000040774 | Cept1      | 1.00E-05    | -0.449313802 |
| ENSMUSG00000023027 | Atf1       | 9.95E-08    | -0.449732973 |
| ENSMUSG00000058254 | Tspan7     | 1.68E-05    | -0.449923354 |
| ENSMUSG00000062382 | Ftl1-ps1   | 0.003547029 | -0.45023247  |
| ENSMUSG00000020572 | Nampt      | 5.71E-05    | -0.450237878 |
| ENSMUSG00000018449 | Rpain      | 1.70E-06    | -0.450921501 |
| ENSMUSG00000021226 | Acot2      | 8.47E-09    | -0.451167546 |



|                    |          |             |              |
|--------------------|----------|-------------|--------------|
| ENSMUSG00000024897 | Apba1    | 0.006548628 | -0.451360888 |
| ENSMUSG00000059456 | Ptk2b    | 0.001010389 | -0.452764323 |
| ENSMUSG00000029722 | Agfg2    | 1.25E-07    | -0.453115271 |
| ENSMUSG00000035637 | Grhpr    | 8.77E-07    | -0.453478425 |
| ENSMUSG0000006304  | Arpc2    | 1.71E-05    | -0.454765007 |
| ENSMUSG00000060803 | Gstp1    | 2.99E-14    | -0.455537121 |
| ENSMUSG00000097830 | Gstp1    | 2.99E-14    | -0.455537121 |
| ENSMUSG00000058558 | Rpl5     | 1.30E-08    | -0.455614177 |
| ENSMUSG00000022797 | Tfrc     | 5.75E-05    | -0.45662519  |
| ENSMUSG00000056666 | Retsat   | 3.96E-08    | -0.457241913 |
| ENSMUSG00000069920 | B3gnt9   | 4.92E-08    | -0.457760809 |
| ENSMUSG00000049339 | Retreg2  | 0.00020773  | -0.458452673 |
| ENSMUSG00000021047 | Nova1    | 0.046469172 | -0.458689664 |
| ENSMUSG00000038451 | Spsb2    | 0.007544988 | -0.458779167 |
| ENSMUSG00000022469 | Rapgef3  | 0.000140383 | -0.458865225 |
| ENSMUSG00000026213 | Stk11ip  | 0.002581558 | -0.459719901 |
| ENSMUSG00000023089 | Ndufa5   | 7.14E-11    | -0.459916576 |
| ENSMUSG00000032047 | Acat1    | 7.07E-09    | -0.46128362  |
| ENSMUSG00000023022 | Lima1    | 8.68E-07    | -0.461302394 |
| ENSMUSG00000021339 | Mrs2     | 1.01E-05    | -0.461903691 |
| ENSMUSG00000029001 | Fbxo44   | 0.00308134  | -0.462687791 |
| ENSMUSG00000036009 | Mettl25  | 0.000166001 | -0.463246282 |
| ENSMUSG00000015337 | Endog    | 0.015677103 | -0.463624146 |
| ENSMUSG00000024511 | Rab27b   | 2.78E-09    | -0.463770967 |
| ENSMUSG00000079020 | Slc45a4  | 0.005107535 | -0.46511594  |
| ENSMUSG00000024558 | Mapk4    | 4.28E-07    | -0.466287336 |
| ENSMUSG00000038859 | Baiap2l1 | 0.006794058 | -0.467129199 |
| ENSMUSG00000017631 | Abr      | 3.84E-06    | -0.467319375 |
| ENSMUSG00000051817 | Sox12    | 0.001312227 | -0.467509383 |
| ENSMUSG00000026202 | Tuba4a   | 3.09E-13    | -0.467669989 |
| ENSMUSG0000000628  | Hk2      | 7.62E-14    | -0.468497343 |
| ENSMUSG00000110206 | Flt3l    | 0.029698266 | -0.469236025 |
| ENSMUSG00000031458 | Coprs    | 3.31E-07    | -0.469710562 |
| ENSMUSG00000022146 | Osmr     | 0.004971797 | -0.47034666  |
| ENSMUSG00000026385 | Dbi      | 0.000111664 | -0.470972293 |
| ENSMUSG00000052911 | Lamb2    | 0.000227543 | -0.471186435 |
| ENSMUSG00000010609 | Psen2    | 0.011091484 | -0.471220813 |
| ENSMUSG00000090247 | Bloc1s1  | 0.001350324 | -0.471263751 |
| ENSMUSG00000035697 | Arhgap45 | 0.016716945 | -0.471759826 |
| ENSMUSG00000046329 | Slc25a23 | 0.036290554 | -0.472743385 |
| ENSMUSG00000044813 | Shb      | 2.14E-10    | -0.472789198 |
| ENSMUSG00000040612 | Ildr2    | 3.70E-07    | -0.473075972 |
| ENSMUSG00000058793 | Cds2     | 0.002466804 | -0.474094216 |
| ENSMUSG00000039217 | Ii18     | 0.000458042 | -0.474461037 |
| ENSMUSG00000028885 | Smpdl3b  | 9.90E-05    | -0.47494001  |
| ENSMUSG00000101174 | Hoxd4    | 0.025698097 | -0.475070226 |
| ENSMUSG00000032051 | Fdx1     | 9.66E-12    | -0.475830522 |

|                     |               |             |              |
|---------------------|---------------|-------------|--------------|
| ENSMUSG00000059839  | Zfp874b       | 0.025067163 | -0.476120959 |
| ENSMUSG00000003849  | Nqo1          | 0.02123802  | -0.476795045 |
| ENSMUSG00000049969  | Plekhf2       | 0.00567997  | -0.477022865 |
| ENSMUSG000000020175 | Rab36         | 0.012002249 | -0.477139053 |
| ENSMUSG00000021773  | Comtd1        | 9.83E-08    | -0.477535082 |
| ENSMUSG00000025732  | Mcrip2        | 1.80E-05    | -0.477544179 |
| ENSMUSG00000036820  | Amdhd2        | 0.009257681 | -0.479330082 |
| ENSMUSG00000022575  | Gsdmd         | 1.21E-10    | -0.479644354 |
| ENSMUSG00000079283  | 2310009B15Rik | 0.002828879 | -0.479722118 |
| ENSMUSG00000036833  | Pnpla7        | 0.00804738  | -0.479980033 |
| ENSMUSG00000030630  | Fah           | 1.44E-08    | -0.480210405 |
| ENSMUSG00000021591  | Glrx          | 8.13E-05    | -0.480427881 |
| ENSMUSG00000028457  | Atp8b5        | 0.046460788 | -0.480583244 |
| ENSMUSG00000041650  | Pcca          | 0.003684283 | -0.481396987 |
| ENSMUSG00000084883  | Ccdc85c       | 0.000151226 | -0.481421762 |
| ENSMUSG00000006057  | Atp5g1        | 1.86E-14    | -0.481686296 |
| ENSMUSG00000090733  | Rps27         | 2.26E-13    | -0.481849441 |
| ENSMUSG00000021000  | Mia2          | 1.63E-15    | -0.48242436  |
| ENSMUSG00000049577  | Zfpm1         | 2.91E-11    | -0.483051791 |
| ENSMUSG00000072115  | Ang           | 0.03898762  | -0.48347641  |
| ENSMUSG00000026222  | Sp100         | 0.000133097 | -0.483530085 |
| ENSMUSG00000050708  | Ftl1          | 2.63E-12    | -0.484673916 |
| ENSMUSG00000001313  | Rnd2          | 7.74E-07    | -0.484815012 |
| ENSMUSG00000040128  | Pnrc1         | 0.019663016 | -0.486876695 |
| ENSMUSG00000027007  | Ssfa2         | 0.003027373 | -0.487205027 |
| ENSMUSG00000023367  | Tmem176a      | 0.000556514 | -0.488274993 |
| ENSMUSG00000025137  | Pcyt2         | 2.55E-06    | -0.48868492  |
| ENSMUSG00000021054  | Sgpp1         | 3.03E-06    | -0.489770364 |
| ENSMUSG00000056665  | Them6         | 0.000233013 | -0.490270031 |
| ENSMUSG00000037772  | Mrpl23        | 0.014456219 | -0.490644573 |
| ENSMUSG00000028420  | Tmem38b       | 0.045393366 | -0.49126568  |
| ENSMUSG00000025986  | Slc39a10      | 0.012876402 | -0.492482287 |
| ENSMUSG00000017929  | B4galt5       | 3.12E-05    | -0.492725691 |
| ENSMUSG00000073725  | Lmbrd1        | 6.93E-05    | -0.493369813 |
| ENSMUSG00000029469  | Ift81         | 0.000385402 | -0.493492082 |
| ENSMUSG00000034903  | Cobll1        | 0.004907326 | -0.495386082 |
| ENSMUSG00000022906  | Parp9         | 0.000282007 | -0.497159779 |
| ENSMUSG00000016206  | H2-M3         | 0.001438453 | -0.497327844 |
| ENSMUSG00000039031  | Arhgap18      | 0.005317662 | -0.498026003 |
| ENSMUSG00000074170  | Plekhf1       | 0.000141191 | -0.498158141 |
| ENSMUSG00000006517  | Mvd           | 0.033485714 | -0.499423323 |
| ENSMUSG00000098078  | Gm26992       | 0.031171988 | -0.499435621 |
| ENSMUSG00000022865  | Cxadr         | 4.52E-06    | -0.50083469  |
| ENSMUSG00000056185  | Snx32         | 0.015673048 | -0.501043777 |
| ENSMUSG00000040428  | Plekha4       | 0.009362075 | -0.501281054 |
| ENSMUSG00000032067  | Pts           | 3.51E-05    | -0.502063749 |
| ENSMUSG00000026198  | Abcb6         | 2.97E-10    | -0.503852646 |

|                    |            |             |              |
|--------------------|------------|-------------|--------------|
| ENSMUSG00000031388 | Naa10      | 3.12E-05    | -0.504421049 |
| ENSMUSG00000023175 | Bsg        | 4.37E-09    | -0.505006125 |
| ENSMUSG00000020629 | Adi1       | 9.44E-16    | -0.507173932 |
| ENSMUSG00000115235 | AC167013.2 | 0.001438453 | -0.50870943  |
| ENSMUSG00000010362 | Rdm1       | 7.59E-05    | -0.509822305 |
| ENSMUSG00000015980 | Lrrc27     | 0.000714485 | -0.510262836 |
| ENSMUSG00000111011 | Lrrc27     | 0.000714485 | -0.510262836 |
| ENSMUSG00000022793 | B4galt4    | 0.010855648 | -0.510532318 |
| ENSMUSG00000038393 | Txnip      | 4.27E-05    | -0.510784501 |
| ENSMUSG00000051335 | Gfod1      | 8.31E-05    | -0.510968756 |
| ENSMUSG00000019774 | Mtrf1l     | 0.009223834 | -0.511530371 |
| ENSMUSG00000018677 | Slc25a39   | 1.26E-13    | -0.512661333 |
| ENSMUSG00000004267 | Eno2       | 3.72E-05    | -0.513419235 |
| ENSMUSG00000024371 | C2         | 0.000167074 | -0.513776582 |
| ENSMUSG00000034522 | Zfp395     | 0.004311379 | -0.514197891 |
| ENSMUSG00000039914 | Coq10a     | 7.49E-06    | -0.51513288  |
| ENSMUSG00000034171 | Faah       | 0.000373903 | -0.515838735 |
| ENSMUSG00000014355 | Anapc1     | 4.64E-15    | -0.515928012 |
| ENSMUSG00000046573 | Lym4       | 2.83E-07    | -0.51771388  |
| ENSMUSG00000047843 | Bri3       | 2.86E-09    | -0.51829692  |
| ENSMUSG00000022216 | Psme1      | 1.98E-12    | -0.518314812 |
| ENSMUSG00000028108 | Ecm1       | 0.003643864 | -0.518634052 |
| ENSMUSG00000050549 | Fam241a    | 9.51E-06    | -0.519012631 |
| ENSMUSG00000028634 | Hivep3     | 0.000232319 | -0.520151581 |
| ENSMUSG00000031295 | Phka2      | 0.018932427 | -0.520402377 |
| ENSMUSG00000039063 | Echdc3     | 0.001486563 | -0.520405015 |
| ENSMUSG00000024712 | Rfk        | 3.22E-05    | -0.520961068 |
| ENSMUSG00000116165 | Pdpx       | 0.007038649 | -0.523049762 |
| ENSMUSG00000007655 | Cav1       | 0.000381423 | -0.523069624 |
| ENSMUSG00000026626 | Ppp2r5a    | 5.78E-08    | -0.52511563  |
| ENSMUSG00000042745 | Id1        | 0.04653143  | -0.525342363 |
| ENSMUSG00000035828 | Pim3       | 2.39E-07    | -0.526382771 |
| ENSMUSG00000016239 | Lonrf3     | 0.000713476 | -0.527774601 |
| ENSMUSG00000055401 | Fbxo6      | 5.16E-12    | -0.527963007 |
| ENSMUSG00000022544 | Eef2kmt    | 9.46E-08    | -0.528323451 |
| ENSMUSG00000020263 | Appl2      | 0.001319569 | -0.529159566 |
| ENSMUSG00000041143 | Tmco4      | 0.000761062 | -0.530992606 |
| ENSMUSG00000064330 | Pde6h      | 0.014871632 | -0.531329907 |
| ENSMUSG00000053411 | Cbx7       | 0.029389302 | -0.531457958 |
| ENSMUSG00000038766 | Gabpb2     | 1.55E-09    | -0.532471023 |
| ENSMUSG00000031788 | Kifc3      | 0.020370398 | -0.536094928 |
| ENSMUSG00000035172 | Plekhh3    | 5.33E-06    | -0.536407848 |
| ENSMUSG00000035285 | Nat14      | 0.015352487 | -0.536715209 |
| ENSMUSG00000038729 | Akap2      | 4.17E-07    | -0.536963374 |
| ENSMUSG00000024778 | Fas        | 9.74E-05    | -0.538527532 |
| ENSMUSG00000068101 | Cenpm      | 0.02758231  | -0.538771013 |
| ENSMUSG00000032578 | Cish       | 0.001427136 | -0.540924913 |

|                    |         |             |              |
|--------------------|---------|-------------|--------------|
| ENSMUSG00000024424 | Ttc39c  | 0.000135762 | -0.540996584 |
| ENSMUSG00000025246 | Tbl1x   | 0.000177359 | -0.541802218 |
| ENSMUSG00000015357 | Clpx    | 5.36E-15    | -0.542491688 |
| ENSMUSG00000002728 | Naa20   | 3.87E-14    | -0.543477111 |
| ENSMUSG00000037295 | Ldlrap1 | 0.000148243 | -0.544468958 |
| ENSMUSG00000057278 | Snrpg   | 8.98E-17    | -0.545808539 |
| ENSMUSG00000039480 | Nt5dc1  | 9.52E-09    | -0.547555611 |
| ENSMUSG00000035778 | Ggta1   | 0.000114323 | -0.548099989 |
| ENSMUSG00000049436 | Upk1b   | 9.25E-23    | -0.548277594 |
| ENSMUSG00000033581 | Igf2bp2 | 6.09E-08    | -0.548987534 |
| ENSMUSG00000026197 | Zfand2b | 2.04E-07    | -0.549963197 |
| ENSMUSG00000027630 | Tbl1xr1 | 0.005853632 | -0.550650013 |
| ENSMUSG00000031266 | Gla     | 1.45E-19    | -0.551356097 |
| ENSMUSG00000050052 | Tdrp    | 0.041145615 | -0.552392074 |
| ENSMUSG00000032968 | Inha    | 0.001266735 | -0.552670121 |
| ENSMUSG00000020648 | Dus4l   | 0.031958567 | -0.552772345 |
| ENSMUSG00000048834 | Vstm2a  | 0.014684251 | -0.552781943 |
| ENSMUSG00000027634 | Ndrp3   | 1.57E-11    | -0.554279383 |
| ENSMUSG00000071657 | Bscl2   | 4.09E-14    | -0.55603628  |
| ENSMUSG00000005803 | Sqor    | 0.005055958 | -0.556835088 |
| ENSMUSG00000079491 | H2-T10  | 1.95E-09    | -0.557052646 |
| ENSMUSG00000021281 | Tnfaip2 | 0.01059063  | -0.557080003 |
| ENSMUSG00000037266 | Rsrp1   | 0.001770102 | -0.557432128 |
| ENSMUSG00000037621 | Atoh8   | 0.039629648 | -0.558623906 |
| ENSMUSG00000065954 | Tacc1   | 5.46E-10    | -0.559062636 |
| ENSMUSG00000028393 | Alad    | 1.97E-06    | -0.559720506 |
| ENSMUSG00000073422 | H2-Ke6  | 2.58E-09    | -0.559777604 |
| ENSMUSG00000111133 | Gm5831  | 0.014145481 | -0.559924216 |
| ENSMUSG00000035441 | Myo1d   | 6.68E-05    | -0.560547496 |
| ENSMUSG00000005615 | Pcyt1a  | 4.27E-06    | -0.562022542 |
| ENSMUSG00000037025 | Foxa2   | 0.012293484 | -0.562121285 |
| ENSMUSG00000024885 | Aldh3b1 | 0.002677368 | -0.56311497  |
| ENSMUSG00000078866 | Zfp970  | 0.0345848   | -0.563762216 |
| ENSMUSG00000023990 | Tfeb    | 0.004390077 | -0.563853572 |
| ENSMUSG00000002985 | ApoE    | 0.000438601 | -0.564168255 |
| ENSMUSG00000015846 | Rxra    | 0.001816238 | -0.566071622 |
| ENSMUSG00000070780 | Rbm47   | 0.036290554 | -0.566213798 |
| ENSMUSG00000022389 | Tef     | 2.46E-05    | -0.566755926 |
| ENSMUSG00000032348 | Gsta4   | 0.049157404 | -0.567008431 |
| ENSMUSG00000074604 | Mgst2   | 0.000179557 | -0.569037053 |
| ENSMUSG00000068551 | Zfp467  | 0.00035858  | -0.571621793 |
| ENSMUSG00000049871 | Nlrc3   | 1.37E-13    | -0.571837113 |
| ENSMUSG00000060675 | Pla2g16 | 1.97E-05    | -0.57534142  |
| ENSMUSG00000064120 | Mocs1   | 3.84E-06    | -0.575651825 |
| ENSMUSG00000022546 | Gpt     | 0.000561413 | -0.576784423 |
| ENSMUSG00000019437 | Tlcd1   | 0.000754138 | -0.576842671 |
| ENSMUSG00000037278 | Tmem97  | 1.82E-09    | -0.577054    |

|                    |               |             |              |
|--------------------|---------------|-------------|--------------|
| ENSMUSG00000023043 | Krt18         | 2.10E-17    | -0.577532113 |
| ENSMUSG00000037348 | Paqr7         | 0.015233871 | -0.579258363 |
| ENSMUSG00000033720 | Sfxn5         | 0.044951065 | -0.579574157 |
| ENSMUSG00000068876 | Cgn           | 0.003664796 | -0.580310691 |
| ENSMUSG00000043252 | Tmem64        | 0.025080458 | -0.583190817 |
| ENSMUSG00000027330 | Cdc25b        | 1.18E-05    | -0.584118745 |
| ENSMUSG00000028402 | Mpdz          | 0.013350683 | -0.584247966 |
| ENSMUSG00000033450 | Tagap         | 0.002192255 | -0.584446396 |
| ENSMUSG00000083111 | Gm14421       | 0.015265584 | -0.584615385 |
| ENSMUSG00000001025 | S100a6        | 2.05E-09    | -0.585740366 |
| ENSMUSG00000055538 | Zcchc24       | 0.015737609 | -0.585803482 |
| ENSMUSG00000017390 | Aldoc         | 0.044727962 | -0.587035498 |
| ENSMUSG00000038058 | Nod1          | 4.60E-06    | -0.5898968   |
| ENSMUSG00000037104 | Socs5         | 0.000807623 | -0.59029833  |
| ENSMUSG00000078931 | Pdf           | 0.001927646 | -0.590634233 |
| ENSMUSG00000022583 | Ly6f          | 0.002720198 | -0.59206514  |
| ENSMUSG00000031910 | Has3          | 0.01071615  | -0.593157369 |
| ENSMUSG00000008855 | Hdac5         | 0.032109705 | -0.593280912 |
| ENSMUSG00000049907 | Rasl11b       | 0.004676776 | -0.593644143 |
| ENSMUSG00000030966 | Trim21        | 0.000332581 | -0.594337808 |
| ENSMUSG00000024395 | Lims2         | 0.002021104 | -0.5963349   |
| ENSMUSG00000110344 | Gm45716       | 7.32E-06    | -0.596889374 |
| ENSMUSG00000006378 | Gcat          | 3.78E-05    | -0.597551069 |
| ENSMUSG00000024556 | Me2           | 0.027457588 | -0.59782603  |
| ENSMUSG00000025465 | Echs1         | 4.23E-14    | -0.598688159 |
| ENSMUSG00000049422 | Chchd10       | 1.10E-09    | -0.599226044 |
| ENSMUSG00000020057 | Dram1         | 0.022117191 | -0.602261999 |
| ENSMUSG00000000881 | Dlg3          | 2.51E-06    | -0.602400188 |
| ENSMUSG00000024480 | Ap3s1         | 0.001556986 | -0.604116522 |
| ENSMUSG00000026576 | Atp1b1        | 0.016115616 | -0.60447942  |
| ENSMUSG00000097327 | E030030I06Rik | 0.00036433  | -0.605577412 |
| ENSMUSG00000039126 | Prune2        | 0.017192472 | -0.605769412 |
| ENSMUSG00000026946 | Nmi           | 6.64E-07    | -0.605977615 |
| ENSMUSG00000078350 | Smim1         | 0.004433674 | -0.606470635 |
| ENSMUSG00000027831 | Veph1         | 0.019953679 | -0.606629704 |
| ENSMUSG00000083649 | Rasl2-9       | 0.008586024 | -0.606994646 |
| ENSMUSG00000024186 | Rgs11         | 0.0130238   | -0.609088519 |
| ENSMUSG00000027332 | Ivd           | 4.57E-06    | -0.609944211 |
| ENSMUSG00000031516 | Dctn6         | 0.000626166 | -0.610087853 |
| ENSMUSG00000029701 | Rbm28         | 9.26E-09    | -0.610097468 |
| ENSMUSG00000050721 | Plekho2       | 0.000990991 | -0.610148165 |
| ENSMUSG00000018845 | Unc45b        | 0.003791062 | -0.610326071 |
| ENSMUSG00000036918 | Ttc7          | 1.97E-08    | -0.610512624 |
| ENSMUSG00000066952 | Myo1h         | 0.000459547 | -0.610755385 |
| ENSMUSG00000005413 | Hmox1         | 1.38E-06    | -0.611142531 |
| ENSMUSG00000042677 | Zc3h12a       | 0.000385986 | -0.612025791 |
| ENSMUSG00000035305 | Ror1          | 8.54E-07    | -0.613204086 |

|                    |             |             |              |
|--------------------|-------------|-------------|--------------|
| ENSMUSG00000027313 | Chac1       | 0.000968496 | -0.613564993 |
| ENSMUSG00000079197 | Psme2       | 5.71E-12    | -0.614722497 |
| ENSMUSG00000042444 | Mindy2      | 1.90E-11    | -0.615556501 |
| ENSMUSG00000026672 | Optrn       | 3.33E-16    | -0.616484527 |
| ENSMUSG00000027488 | Snta1       | 2.08E-11    | -0.617543751 |
| ENSMUSG00000022186 | Oxct1       | 1.91E-19    | -0.618432473 |
| ENSMUSG00000030341 | Tnfrsf1a    | 2.47E-05    | -0.620020074 |
| ENSMUSG00000056501 | Cebpb       | 0.021284634 | -0.621106534 |
| ENSMUSG00000033389 | Arhgap44    | 0.00023157  | -0.62162196  |
| ENSMUSG00000050786 | Ccdc126     | 9.96E-13    | -0.622399639 |
| ENSMUSG00000031217 | Efnb1       | 1.34E-10    | -0.623439057 |
| ENSMUSG00000036158 | Prickle1    | 0.007101039 | -0.624473018 |
| ENSMUSG00000035277 | Arx         | 0.039475012 | -0.624849224 |
| ENSMUSG00000089665 | Fcor        | 0.007474507 | -0.625293598 |
| ENSMUSG00000048332 | Lhfp        | 9.37E-15    | -0.626718586 |
| ENSMUSG00000027954 | Efna1       | 2.67E-06    | -0.62815399  |
| ENSMUSG00000046314 | Stxbp6      | 0.005130683 | -0.629240367 |
| ENSMUSG00000029718 | Pcolce      | 1.47E-31    | -0.632990304 |
| ENSMUSG00000066637 | Ttc32       | 0.000760071 | -0.634729665 |
| ENSMUSG00000039713 | Plekhg5     | 0.012062131 | -0.636247405 |
| ENSMUSG00000064036 | Mro         | 0.029730503 | -0.636627832 |
| ENSMUSG00000060275 | Nrg2        | 0.000715966 | -0.637372063 |
| ENSMUSG00000025402 | Nab2        | 0.001111742 | -0.637731318 |
| ENSMUSG00000049124 | Gm8186      | 6.43E-25    | -0.638901118 |
| ENSMUSG00000085028 | Slc2a4rg-ps | 2.24E-05    | -0.640031332 |
| ENSMUSG00000020589 | Fam49a      | 0.012964493 | -0.640141353 |
| ENSMUSG00000038550 | Ciart       | 0.009285001 | -0.6406099   |
| ENSMUSG00000015766 | Eps8        | 1.50E-09    | -0.641401156 |
| ENSMUSG00000074682 | Zcchc3      | 0.000111188 | -0.64219951  |
| ENSMUSG00000052102 | Gnpda1      | 0.004575998 | -0.644219559 |
| ENSMUSG00000048706 | Lurap1l     | 2.94E-05    | -0.644599476 |
| ENSMUSG00000036611 | Eepd1       | 4.86E-07    | -0.648260403 |
| ENSMUSG00000021094 | Dhrs7       | 1.59E-22    | -0.649015752 |
| ENSMUSG00000024197 | Plin3       | 3.10E-07    | -0.649902907 |
| ENSMUSG00000032202 | Rab27a      | 1.13E-10    | -0.650720906 |
| ENSMUSG00000022822 | Abcc5       | 1.12E-07    | -0.651896454 |
| ENSMUSG00000045294 | Insig1      | 0.020237558 | -0.653390622 |
| ENSMUSG0000003032  | Klf4        | 1.83E-16    | -0.653609311 |
| ENSMUSG00000040875 | Osbpl10     | 0.00020106  | -0.654585771 |
| ENSMUSG00000026399 | Cd55        | 2.36E-13    | -0.655266139 |
| ENSMUSG00000072812 | Ahnak2      | 4.77E-08    | -0.655959349 |
| ENSMUSG00000020331 | Hcn2        | 6.86E-07    | -0.656433155 |
| ENSMUSG00000038816 | Ctnnal1     | 0.000186903 | -0.656878901 |
| ENSMUSG00000017009 | Sdc4        | 0.007117255 | -0.657066581 |
| ENSMUSG00000037936 | Scarb1      | 9.68E-19    | -0.657510176 |
| ENSMUSG00000025059 | Gk          | 0.016115616 | -0.658325206 |
| ENSMUSG00000116477 | MF597757.2  | 3.37E-07    | -0.658334911 |

|                    |               |             |              |
|--------------------|---------------|-------------|--------------|
| ENSMUSG00000041362 | Shtn1         | 1.27E-05    | -0.658834848 |
| ENSMUSG00000026535 | Ifi202b       | 8.26E-07    | -0.659562079 |
| ENSMUSG00000032501 | Trib1         | 7.53E-21    | -0.659751503 |
| ENSMUSG00000002107 | Celf2         | 5.63E-11    | -0.660949482 |
| ENSMUSG00000025492 | Ifitm3        | 3.87E-06    | -0.663716476 |
| ENSMUSG00000043822 | Adamts15      | 1.91E-11    | -0.664713347 |
| ENSMUSG00000056596 | Trnp1         | 0.033327652 | -0.665086101 |
| ENSMUSG00000045975 | C2cd2         | 1.14E-19    | -0.667010371 |
| ENSMUSG00000002983 | Relb          | 7.04E-06    | -0.667755338 |
| ENSMUSG00000100595 | Gm19087       | 0.008826772 | -0.669079315 |
| ENSMUSG00000040701 | Ap1g2         | 0.000175787 | -0.670519642 |
| ENSMUSG00000047604 | Frat2         | 0.002459971 | -0.671582317 |
| ENSMUSG00000022899 | Slc15a2       | 0.049453697 | -0.671962784 |
| ENSMUSG00000038527 | C1rl          | 0.001514922 | -0.673219744 |
| ENSMUSG00000038742 | Angptl6       | 0.005317152 | -0.673231665 |
| ENSMUSG00000042684 | Npl           | 1.78E-19    | -0.67335771  |
| ENSMUSG00000073435 | Nme3          | 0.000991974 | -0.675079813 |
| ENSMUSG00000019838 | Slc16a10      | 0.000134161 | -0.676638104 |
| ENSMUSG00000018381 | Abi3          | 0.031542555 | -0.6781613   |
| ENSMUSG00000025408 | Ddit3         | 2.58E-11    | -0.678552193 |
| ENSMUSG00000038764 | Ptpn3         | 9.56E-09    | -0.679417775 |
| ENSMUSG00000010154 | Spire2        | 0.000377976 | -0.680209358 |
| ENSMUSG00000021708 | Rasgrf2       | 0.003688299 | -0.681671606 |
| ENSMUSG00000053219 | Raet1e        | 3.33E-11    | -0.684707029 |
| ENSMUSG00000080888 | Gm14387       | 0.016067073 | -0.685130573 |
| ENSMUSG00000036944 | Tmem71        | 2.05E-15    | -0.685978061 |
| ENSMUSG00000046027 | Stard5        | 2.18E-05    | -0.68738253  |
| ENSMUSG00000027173 | Depdc7        | 4.43E-06    | -0.687402662 |
| ENSMUSG00000038178 | Slc43a2       | 0.005323151 | -0.687447857 |
| ENSMUSG00000032680 | 6820408C15Rik | 0.000127357 | -0.687670358 |
| ENSMUSG00000027200 | Sema6d        | 0.019633383 | -0.688708668 |
| ENSMUSG00000049097 | Ankrd34a      | 0.022443815 | -0.690924791 |
| ENSMUSG00000021390 | Ogn           | 0.003356492 | -0.691956182 |
| ENSMUSG00000022587 | Ly6e          | 0.002055487 | -0.692306859 |
| ENSMUSG00000025511 | Tspan4        | 1.16E-06    | -0.693683701 |
| ENSMUSG00000019856 | Fam184a       | 1.13E-05    | -0.694244275 |
| ENSMUSG00000023034 | Nr4a1         | 0.000725736 | -0.694570716 |
| ENSMUSG00000024187 | Fam234a       | 0.029537215 | -0.695554841 |
| ENSMUSG00000078452 | Raet1d        | 9.96E-20    | -0.696369691 |
| ENSMUSG00000005125 | Ndrp1         | 2.92E-09    | -0.69665663  |
| ENSMUSG00000022747 | St3gal6       | 1.97E-08    | -0.697050428 |
| ENSMUSG00000055447 | Cd47          | 8.85E-14    | -0.697846997 |
| ENSMUSG00000055435 | Maf           | 8.84E-05    | -0.698006521 |
| ENSMUSG00000040713 | Creg1         | 1.75E-27    | -0.69938152  |
| ENSMUSG00000032038 | St3gal4       | 3.79E-05    | -0.70052477  |
| ENSMUSG00000111640 | AC109138.7    | 0.04864758  | -0.701437211 |
| ENSMUSG00000055301 | Adh7          | 4.65E-13    | -0.702350853 |

|                    |               |             |              |
|--------------------|---------------|-------------|--------------|
| ENSMUSG00000021481 | Zfp346        | 4.25E-09    | -0.703068117 |
| ENSMUSG00000024437 | Gm8615        | 0.000561413 | -0.704903611 |
| ENSMUSG00000025503 | Taldo1        | 1.26E-05    | -0.70506652  |
| ENSMUSG00000030161 | Gabarapl1     | 0.013461166 | -0.706415173 |
| ENSMUSG00000010080 | Epn3          | 0.000689245 | -0.713153695 |
| ENSMUSG00000053175 | Bcl3          | 0.046085045 | -0.715025253 |
| ENSMUSG00000026389 | Steap3        | 0.000376821 | -0.715877698 |
| ENSMUSG00000020656 | Grhl1         | 0.001744288 | -0.716447863 |
| ENSMUSG00000023886 | Smoc2         | 0.001701971 | -0.717730137 |
| ENSMUSG0000003617  | Cp            | 0.015285337 | -0.718020657 |
| ENSMUSG00000027931 | Npr1          | 0.031542555 | -0.718820512 |
| ENSMUSG00000025466 | Fuom          | 1.28E-13    | -0.719772211 |
| ENSMUSG00000036103 | Colec12       | 5.60E-05    | -0.721029893 |
| ENSMUSG00000022540 | Rogdi         | 1.51E-08    | -0.723533996 |
| ENSMUSG00000043122 | A530016L24Rik | 5.01E-06    | -0.725280751 |
| ENSMUSG00000031765 | Mt1           | 0.000211217 | -0.725418671 |
| ENSMUSG00000018861 | Fdxr          | 2.70E-05    | -0.726521147 |
| ENSMUSG00000047810 | Ccdc88b       | 0.015792306 | -0.729007462 |
| ENSMUSG00000020620 | Abca8b        | 0.007859329 | -0.730063117 |
| ENSMUSG00000054150 | Syne3         | 7.24E-07    | -0.730510261 |
| ENSMUSG00000075297 | H60b          | 5.74E-20    | -0.732086421 |
| ENSMUSG00000059742 | Kcnh7         | 0.028139715 | -0.732161593 |
| ENSMUSG00000048731 | Ggnbp1        | 0.001122733 | -0.734966036 |
| ENSMUSG00000026315 | Serpinb8      | 4.38E-06    | -0.73650099  |
| ENSMUSG00000019787 | Trdn          | 0.030798564 | -0.736540065 |
| ENSMUSG00000057497 | Fam136a       | 5.44E-07    | -0.7392069   |
| ENSMUSG00000025026 | Add3          | 0.031495154 | -0.741747151 |
| ENSMUSG00000035158 | Mitf          | 0.000148533 | -0.741792393 |
| ENSMUSG00000014791 | Elmo3         | 0.042179004 | -0.742039981 |
| ENSMUSG00000058135 | Gstm1         | 0.000260728 | -0.743722915 |
| ENSMUSG00000035385 | Ccl2          | 6.31E-11    | -0.744867969 |
| ENSMUSG00000034334 | Fam151b       | 0.000541939 | -0.746107888 |
| ENSMUSG00000006273 | Atp6v1b2      | 1.87E-09    | -0.746407934 |
| ENSMUSG00000034394 | Lif           | 9.29E-06    | -0.746424825 |
| ENSMUSG00000019880 | Rspo3         | 8.90E-05    | -0.747591959 |
| ENSMUSG00000022091 | Sorbs3        | 0.0024373   | -0.75048303  |
| ENSMUSG00000098188 | Sowahc        | 0.003246824 | -0.754583919 |
| ENSMUSG00000034586 | Hid1          | 1.22E-08    | -0.756019533 |
| ENSMUSG00000053604 | Rpia          | 4.96E-06    | -0.757198749 |
| ENSMUSG00000056116 | H2-T22        | 7.08E-13    | -0.758024871 |
| ENSMUSG00000028152 | Tspan5        | 0.001055771 | -0.758439939 |
| ENSMUSG00000027296 | Itpka         | 0.048876694 | -0.758678309 |
| ENSMUSG00000038213 | Tapbp1        | 2.35E-15    | -0.759996761 |
| ENSMUSG00000031112 | Stk26         | 0.005261773 | -0.762782928 |
| ENSMUSG00000000594 | Gm2a          | 0.000292395 | -0.763394201 |
| ENSMUSG00000001247 | Lsr           | 0.023125738 | -0.763847048 |
| ENSMUSG00000024661 | Fth1          | 5.34E-09    | -0.765387446 |



|                    |          |             |              |
|--------------------|----------|-------------|--------------|
| ENSMUSG00000028015 | Ctso     | 0.000107307 | -0.76597091  |
| ENSMUSG00000026941 | Mamdc4   | 0.048449027 | -0.766764755 |
| ENSMUSG00000025779 | Ly96     | 0.000161911 | -0.767693444 |
| ENSMUSG00000033871 | Ppargc1b | 0.000223526 | -0.768349854 |
| ENSMUSG00000020743 | Mif4gd   | 1.75E-05    | -0.769408564 |
| ENSMUSG00000031698 | Mylk3    | 0.018481684 | -0.77106233  |
| ENSMUSG00000075410 | Prcd     | 0.029789553 | -0.773347697 |
| ENSMUSG00000043635 | Adamts3  | 2.64E-09    | -0.775769331 |
| ENSMUSG00000035284 | Vps13c   | 8.36E-07    | -0.776819628 |
| ENSMUSG00000055692 | Tmem191c | 0.000323772 | -0.777911722 |
| ENSMUSG00000047641 | Krt87    | 0.034790925 | -0.77830232  |
| ENSMUSG00000026018 | Ica1l    | 0.011948729 | -0.779517033 |
| ENSMUSG00000021583 | Erap1    | 9.92E-07    | -0.783812482 |
| ENSMUSG00000021236 | Entpd5   | 6.62E-15    | -0.784207332 |
| ENSMUSG00000019929 | Dcn      | 7.77E-41    | -0.786152095 |
| ENSMUSG00000060961 | Slc4a4   | 0.005073433 | -0.786441844 |
| ENSMUSG00000020023 | Tmcc3    | 0.005299324 | -0.786800347 |
| ENSMUSG00000081534 | Slc48a1  | 2.09E-06    | -0.788811649 |
| ENSMUSG00000006642 | Tcf23    | 0.028675125 | -0.790538112 |
| ENSMUSG00000021175 | Cdca7l   | 7.58E-05    | -0.795398942 |
| ENSMUSG00000021759 | Plpp1    | 3.49E-31    | -0.797913773 |
| ENSMUSG00000031574 | Star     | 0.013333956 | -0.797961965 |
| ENSMUSG00000034765 | Dusp5    | 7.49E-24    | -0.799221723 |
| ENSMUSG00000047409 | Ctdspl   | 0.004661296 | -0.800798184 |
| ENSMUSG00000021238 | Aldh6a1  | 0.001760999 | -0.802339443 |
| ENSMUSG00000026956 | Uap1l1   | 3.32E-09    | -0.804067408 |
| ENSMUSG00000039852 | Rere     | 0.003267752 | -0.807763239 |
| ENSMUSG00000025932 | Eya1     | 4.26E-06    | -0.808369365 |
| ENSMUSG00000027962 | Vcam1    | 1.45E-27    | -0.815097591 |
| ENSMUSG00000006576 | Slc4a3   | 0.00852395  | -0.816558292 |
| ENSMUSG00000023039 | Krt7     | 7.74E-07    | -0.819537849 |
| ENSMUSG00000001642 | Akr1b3   | 0.036606193 | -0.821598306 |
| ENSMUSG00000026430 | Rassf5   | 5.57E-14    | -0.825495438 |
| ENSMUSG00000075590 | Nrbp2    | 1.41E-15    | -0.8256537   |
| ENSMUSG00000038633 | Degs1    | 3.07E-32    | -0.826548604 |
| ENSMUSG00000028412 | Slc44a1  | 0.000655281 | -0.827396088 |
| ENSMUSG00000037902 | Sirpa    | 0.001780731 | -0.82750963  |
| ENSMUSG00000039395 | Mreg     | 1.45E-10    | -0.827652676 |
| ENSMUSG00000029998 | Pcyox1   | 8.71E-05    | -0.8286066   |
| ENSMUSG00000024646 | Cyb5a    | 6.59E-22    | -0.829206637 |
| ENSMUSG00000049811 | Fam161a  | 3.96E-08    | -0.832350783 |
| ENSMUSG00000024339 | Tap2     | 8.88E-07    | -0.833244452 |
| ENSMUSG00000100309 | Gm6644   | 0.045639817 | -0.833592967 |
| ENSMUSG00000027901 | Dennd2d  | 0.004675969 | -0.834324994 |
| ENSMUSG00000049892 | Rasd1    | 0.0498752   | -0.834592058 |
| ENSMUSG00000052135 | Foxo6    | 0.005919746 | -0.836285558 |
| ENSMUSG00000041762 | Gpr155   | 5.12E-05    | -0.839071286 |

|                    |               |             |              |
|--------------------|---------------|-------------|--------------|
| ENSMUSG00000044786 | Zfp36         | 0.002277388 | -0.840194282 |
| ENSMUSG00000073405 | H2-T-ps       | 1.04E-08    | -0.841151593 |
| ENSMUSG00000037071 | Scd1          | 2.28E-08    | -0.842548186 |
| ENSMUSG00000024308 | Tapbp         | 0.000586762 | -0.843048306 |
| ENSMUSG00000027896 | Slc16a4       | 0.009778981 | -0.844336854 |
| ENSMUSG00000068015 | Lrch1         | 0.00447158  | -0.848818732 |
| ENSMUSG00000054013 | Tmem179       | 0.01208603  | -0.850127062 |
| ENSMUSG00000061175 | Fnip2         | 1.58E-19    | -0.850229205 |
| ENSMUSG00000038756 | Ttll6         | 0.015547387 | -0.850703968 |
| ENSMUSG00000021758 | Ddx4          | 0.017557358 | -0.858183841 |
| ENSMUSG00000053835 | H2-T24        | 3.63E-06    | -0.858518361 |
| ENSMUSG00000054619 | Mettl7a1      | 0.001703924 | -0.861813621 |
| ENSMUSG00000067212 | H2-T23        | 8.58E-10    | -0.862787042 |
| ENSMUSG00000025372 | Baiap2        | 6.95E-33    | -0.863088207 |
| ENSMUSG00000030000 | Add2          | 0.005874157 | -0.863861909 |
| ENSMUSG00000035373 | Ccl7          | 2.21E-06    | -0.864137235 |
| ENSMUSG00000014329 | Bicc1         | 0.001865804 | -0.867428637 |
| ENSMUSG00000049202 | 4930515G13Rik | 0.046455458 | -0.869504699 |
| ENSMUSG00000008206 | Cers4         | 1.54E-06    | -0.869561343 |
| ENSMUSG00000025888 | Casp1         | 9.41E-07    | -0.871169678 |
| ENSMUSG00000018899 | Irf1          | 0.001367403 | -0.872659165 |
| ENSMUSG00000090125 | Pou3f1        | 0.008250527 | -0.878490011 |
| ENSMUSG00000015568 | Lpl           | 6.22E-56    | -0.87929435  |
| ENSMUSG00000030246 | Ldhb          | 0.008124611 | -0.879609493 |
| ENSMUSG00000032652 | Crebl2        | 0.001995724 | -0.882014306 |
| ENSMUSG00000075012 | Fjx1          | 4.34E-13    | -0.882960079 |
| ENSMUSG00000033538 | Casp4         | 5.08E-10    | -0.886926123 |
| ENSMUSG00000097214 | Gm19791       | 0.000439308 | -0.889221369 |
| ENSMUSG00000017417 | Plxdc1        | 0.002925861 | -0.890395264 |
| ENSMUSG00000031877 | Ces2g         | 5.87E-26    | -0.896268542 |
| ENSMUSG00000037762 | Slc16a9       | 4.61E-10    | -0.8967015   |
| ENSMUSG00000020473 | Aebp1         | 1.06E-08    | -0.897231683 |
| ENSMUSG00000036553 | Sh3tc1        | 2.14E-08    | -0.901498494 |
| ENSMUSG00000045954 | Cavin2        | 1.11E-06    | -0.906751986 |
| ENSMUSG00000027796 | Smad9         | 0.0331502   | -0.907457474 |
| ENSMUSG00000028064 | Sema4a        | 3.43E-09    | -0.907636241 |
| ENSMUSG00000044788 | Fads6         | 0.000139713 | -0.908509658 |
| ENSMUSG00000024066 | Xdh           | 0.000356167 | -0.909186631 |
| ENSMUSG00000045104 | Gm5514        | 0.010546789 | -0.909318419 |
| ENSMUSG00000000290 | Itgb2         | 0.040495401 | -0.909997172 |
| ENSMUSG00000017167 | Cntnap1       | 6.29E-12    | -0.910674599 |
| ENSMUSG00000042258 | Isl1          | 0.025819886 | -0.912249339 |
| ENSMUSG00000024036 | Slc37a1       | 0.048288047 | -0.916904037 |
| ENSMUSG00000082593 | Gm11331       | 0.028422265 | -0.91957727  |
| ENSMUSG00000026109 | Tmeff2        | 0.033412955 | -0.92117645  |
| ENSMUSG00000049791 | Fzd4          | 0.003129696 | -0.9215664   |
| ENSMUSG00000020486 | 04-Sep        | 0.006172417 | -0.924813882 |

|                    |          |             |              |
|--------------------|----------|-------------|--------------|
| ENSMUSG00000055148 | Klf2     | 2.29E-09    | -0.931352251 |
| ENSMUSG00000038167 | Plekhg6  | 7.08E-05    | -0.935051246 |
| ENSMUSG00000018774 | Cd68     | 7.70E-09    | -0.937481979 |
| ENSMUSG00000041120 | Nbl1     | 0.009917273 | -0.938373224 |
| ENSMUSG00000032750 | Gab3     | 0.005021334 | -0.938451976 |
| ENSMUSG00000020733 | Slc9a3r1 | 1.58E-05    | -0.943265492 |
| ENSMUSG00000043259 | Fam13c   | 0.01032373  | -0.945092597 |
| ENSMUSG00000027068 | Dhrs9    | 7.37E-09    | -0.953075062 |
| ENSMUSG00000028909 | Ptpru    | 0.002468731 | -0.953718088 |
| ENSMUSG00000008540 | Mgst1    | 0.003129696 | -0.956166984 |
| ENSMUSG00000055172 | C1ra     | 1.49E-09    | -0.959502534 |
| ENSMUSG00000061451 | Tmem151a | 0.000186467 | -0.96003763  |
| ENSMUSG00000024180 | Tmem8    | 1.38E-06    | -0.964069779 |
| ENSMUSG00000069814 | Ccdc92b  | 0.003864991 | -0.966059718 |
| ENSMUSG00000018900 | Slc22a5  | 0.001956636 | -0.969522356 |
| ENSMUSG00000021638 | Ocln     | 0.000101414 | -0.969894342 |
| ENSMUSG00000058966 | Fam57b   | 9.31E-07    | -0.979174952 |
| ENSMUSG00000099032 | Tcf24    | 3.21E-08    | -0.983458188 |
| ENSMUSG00000039742 | Fam71f1  | 0.021071364 | -0.991363867 |
| ENSMUSG00000050896 | Rtn4r12  | 0.039752849 | -0.997459667 |
| ENSMUSG00000015702 | Anxa9    | 0.000107577 | -0.9994284   |
| ENSMUSG00000016024 | Lbp      | 0.016104699 | -1.001002387 |
| ENSMUSG00000029084 | Cd38     | 0.001541861 | -1.006602175 |
| ENSMUSG00000091119 | Ccdc152  | 0.010932242 | -1.007305118 |
| ENSMUSG00000045392 | Olfr1033 | 0.047118568 | -1.010538107 |
| ENSMUSG0000002997  | Prkar2b  | 1.21E-06    | -1.011030296 |
| ENSMUSG00000033768 | Nrxn2    | 0.044769213 | -1.01432693  |
| ENSMUSG00000107104 | Nrxn2    | 0.044769213 | -1.01432693  |
| ENSMUSG00000037594 | BC022687 | 7.77E-05    | -1.015593748 |
| ENSMUSG00000116084 | BC022687 | 7.77E-05    | -1.015593748 |
| ENSMUSG00000026880 | Stom     | 0.003504818 | -1.015667324 |
| ENSMUSG00000027947 | Il6ra    | 3.64E-16    | -1.016627021 |
| ENSMUSG00000024245 | Tmem178  | 0.010326957 | -1.016631774 |
| ENSMUSG00000030433 | Sbk2     | 0.021043255 | -1.018282949 |
| ENSMUSG00000045903 | Npas4    | 0.014821789 | -1.022828116 |
| ENSMUSG00000033880 | Lgals3bp | 0.018935272 | -1.027545082 |
| ENSMUSG00000025083 | Afap1l2  | 0.001052634 | -1.02988735  |
| ENSMUSG00000025037 | Maoa     | 0.016284552 | -1.035418422 |
| ENSMUSG00000025321 | Itgb8    | 0.048581196 | -1.038334625 |
| ENSMUSG00000043088 | Il17re   | 0.035950394 | -1.045164854 |
| ENSMUSG00000004207 | Psap     | 5.38E-15    | -1.047924181 |
| ENSMUSG00000042985 | Upk3b    | 0.028326899 | -1.048132345 |
| ENSMUSG00000096727 | Psemb9   | 0.014972127 | -1.051053523 |
| ENSMUSG00000024065 | Ehd3     | 3.76E-06    | -1.054380114 |
| ENSMUSG00000036856 | Wnt4     | 0.000308919 | -1.055776392 |
| ENSMUSG00000053113 | Socs3    | 8.83E-06    | -1.064188001 |
| ENSMUSG00000036585 | Fgf1     | 0.018049778 | -1.068347376 |

|                    |            |             |              |
|--------------------|------------|-------------|--------------|
| ENSMUSG00000019846 | Lama4      | 0.001031726 | -1.070051879 |
| ENSMUSG00000031958 | Ldhd       | 2.35E-10    | -1.077123729 |
| ENSMUSG00000098470 | C1rb       | 5.57E-11    | -1.078314528 |
| ENSMUSG00000038486 | Sv2a       | 0.00013697  | -1.080233855 |
| ENSMUSG00000017493 | Igfbp4     | 0.001101643 | -1.082117886 |
| ENSMUSG00000032816 | Igdcc4     | 0.009022717 | -1.092079408 |
| ENSMUSG00000032596 | Uba7       | 1.49E-10    | -1.092684177 |
| ENSMUSG00000038418 | Egr1       | 0.000461946 | -1.093694184 |
| ENSMUSG00000064373 | Selenop    | 0.020234206 | -1.096773401 |
| ENSMUSG00000038776 | Ephx1      | 4.42E-06    | -1.097837674 |
| ENSMUSG00000039601 | Rcan2      | 0.001596229 | -1.100258089 |
| ENSMUSG00000027227 | Sord       | 2.87E-08    | -1.102315061 |
| ENSMUSG00000079531 | Gm5936     | 0.022819765 | -1.108868007 |
| ENSMUSG00000096883 | Shisa8     | 0.001142769 | -1.109555372 |
| ENSMUSG00000028268 | Gbp3       | 0.032988547 | -1.111484831 |
| ENSMUSG00000070427 | Il18bp     | 2.71E-06    | -1.114131634 |
| ENSMUSG00000000253 | Gmpr       | 0.000369405 | -1.123842308 |
| ENSMUSG00000003341 | Atp8b3     | 0.040556617 | -1.134355914 |
| ENSMUSG00000023046 | Igfbp6     | 0.018634164 | -1.137025963 |
| ENSMUSG00000029298 | Gbp9       | 5.64E-06    | -1.139099889 |
| ENSMUSG00000021379 | Id4        | 0.009774225 | -1.139337347 |
| ENSMUSG00000024793 | Tnfrsf25   | 0.000186741 | -1.139911671 |
| ENSMUSG00000004698 | Hdac9      | 0.009867654 | -1.14773634  |
| ENSMUSG00000032011 | Thy1       | 5.00E-28    | -1.152940773 |
| ENSMUSG00000109916 | Gm45551    | 0.035809096 | -1.155796581 |
| ENSMUSG00000013846 | St3gal1    | 0.036535013 | -1.160435711 |
| ENSMUSG00000023992 | Trem2      | 0.011091484 | -1.174986028 |
| ENSMUSG00000116470 | Trem2      | 0.011091484 | -1.174986028 |
| ENSMUSG00000032902 | Slc16a1    | 8.21E-07    | -1.176640576 |
| ENSMUSG00000024235 | Map3k8     | 0.001177925 | -1.177067882 |
| ENSMUSG00000018500 | Adora2b    | 0.038545921 | -1.177636335 |
| ENSMUSG00000030793 | Pycard     | 0.04129225  | -1.179954733 |
| ENSMUSG00000014361 | Mertk      | 1.22E-16    | -1.183245903 |
| ENSMUSG00000115808 | AC133101.1 | 0.025895149 | -1.18347208  |
| ENSMUSG00000044052 | Ccr10      | 1.10E-11    | -1.18383572  |
| ENSMUSG00000006457 | Actn3      | 8.29E-05    | -1.193131846 |
| ENSMUSG00000050860 | Phospho1   | 6.01E-19    | -1.193528037 |
| ENSMUSG00000054659 | Pm20d2     | 4.08E-09    | -1.194069169 |
| ENSMUSG00000005686 | Ampd3      | 1.93E-07    | -1.195629033 |
| ENSMUSG00000031897 | Psmb10     | 9.74E-16    | -1.199304352 |
| ENSMUSG00000029765 | Plxna4     | 5.41E-05    | -1.20141623  |
| ENSMUSG00000039114 | Nrn1       | 0.00048625  | -1.209736304 |
| ENSMUSG00000031538 | Plat       | 7.53E-07    | -1.230790028 |
| ENSMUSG00000030157 | Clec2d     | 0.000470853 | -1.232662473 |
| ENSMUSG00000054855 | Rnd1       | 9.96E-05    | -1.237998873 |
| ENSMUSG00000054545 | Ugt1a6a    | 0.014461004 | -1.238073236 |
| ENSMUSG00000031380 | Vegfd      | 5.32E-20    | -1.241864647 |

|                    |          |             |              |
|--------------------|----------|-------------|--------------|
| ENSMUSG00000033715 | Akr1c14  | 0.026229505 | -1.247182806 |
| ENSMUSG00000040253 | Gbp7     | 0.000673037 | -1.254296036 |
| ENSMUSG00000092035 | Peg10    | 0.003397915 | -1.254493647 |
| ENSMUSG00000027452 | Acss1    | 0.039649605 | -1.255435261 |
| ENSMUSG00000059327 | Eda      | 2.29E-08    | -1.257121353 |
| ENSMUSG00000023243 | Kcnk5    | 0.000217936 | -1.268046328 |
| ENSMUSG00000027674 | Pex5l    | 0.004817151 | -1.268804952 |
| ENSMUSG00000090145 | Ugt1a6b  | 0.000116131 | -1.27164588  |
| ENSMUSG00000027913 | Crct1    | 0.010559894 | -1.274705205 |
| ENSMUSG00000006587 | Snai3    | 0.000329384 | -1.274842978 |
| ENSMUSG00000029136 | Rbks     | 0.018385468 | -1.283686421 |
| ENSMUSG00000043587 | Pxylp1   | 0.001292776 | -1.287931291 |
| ENSMUSG00000015202 | Magi1    | 2.14E-05    | -1.288278313 |
| ENSMUSG00000029075 | Tnfrsf4  | 3.47E-05    | -1.294983763 |
| ENSMUSG00000057000 | Nxf3     | 8.83E-05    | -1.305752233 |
| ENSMUSG00000023045 | Soat2    | 0.010338688 | -1.312019907 |
| ENSMUSG00000022257 | Laptm4b  | 2.43E-06    | -1.314715712 |
| ENSMUSG00000027574 | Nkain4   | 0.006291665 | -1.318826345 |
| ENSMUSG00000040147 | Maob     | 0.047923266 | -1.327576005 |
| ENSMUSG00000070323 | Mmp27    | 0.00202835  | -1.328292657 |
| ENSMUSG00000071317 | Bves     | 3.69E-06    | -1.33898155  |
| ENSMUSG00000040035 | Disp2    | 5.78E-05    | -1.340877707 |
| ENSMUSG00000040584 | Abcb1a   | 1.00E-10    | -1.347361987 |
| ENSMUSG00000044827 | Tlr1     | 0.001289685 | -1.351894463 |
| ENSMUSG00000032010 | Usp2     | 4.95E-05    | -1.360131075 |
| ENSMUSG00000038843 | Gcnt1    | 3.69E-07    | -1.364986001 |
| ENSMUSG00000096107 | Gm16505  | 0.000771152 | -1.38461123  |
| ENSMUSG00000027442 | Cst8     | 0.021043255 | -1.38727694  |
| ENSMUSG00000028943 | Espn     | 5.39E-07    | -1.388310146 |
| ENSMUSG00000079057 | Cyp4v3   | 0.041654251 | -1.396668495 |
| ENSMUSG00000031162 | Gata1    | 0.042822231 | -1.399289284 |
| ENSMUSG00000046056 | Sbsn     | 1.64E-06    | -1.40338555  |
| ENSMUSG00000029771 | Irf5     | 0.017665781 | -1.409151104 |
| ENSMUSG00000034127 | Tspan8   | 0.003402282 | -1.415006694 |
| ENSMUSG00000028528 | Dnajc6   | 0.003739835 | -1.417522673 |
| ENSMUSG00000047189 | Gm9818   | 0.023821331 | -1.435016697 |
| ENSMUSG00000006014 | Prg4     | 4.84E-06    | -1.44665683  |
| ENSMUSG00000051228 | Nyx      | 4.95E-07    | -1.460858535 |
| ENSMUSG00000040264 | Gbp2b    | 0.001861708 | -1.462712483 |
| ENSMUSG00000030703 | Gdpd3    | 0.010164078 | -1.464780764 |
| ENSMUSG00000034258 | Flvcr2   | 0.005525722 | -1.469246272 |
| ENSMUSG00000037161 | Mgarp    | 0.007887657 | -1.470610091 |
| ENSMUSG00000013418 | B4galnt2 | 0.01041692  | -1.490466173 |
| ENSMUSG00000071604 | Fam189a2 | 0.000524967 | -1.490614383 |
| ENSMUSG00000042254 | Cilp     | 0.0065036   | -1.498761088 |
| ENSMUSG00000005373 | Mlxipl   | 0.002701644 | -1.505779532 |
| ENSMUSG00000003949 | Hlf      | 0.028995925 | -1.505962636 |

|                    |          |             |              |
|--------------------|----------|-------------|--------------|
| ENSMUSG00000038811 | Gngt2    | 0.000109247 | -1.52136493  |
| ENSMUSG00000025170 | Rab40b   | 5.19E-06    | -1.523624675 |
| ENSMUSG00000036596 | Cpz      | 0.003093861 | -1.534547836 |
| ENSMUSG00000036330 | Slc18a1  | 7.03E-06    | -1.536984614 |
| ENSMUSG00000079457 | Gm7609   | 0.01520076  | -1.540754842 |
| ENSMUSG00000030494 | Rhpn2    | 1.48E-12    | -1.541100569 |
| ENSMUSG00000061132 | Blnk     | 1.18E-22    | -1.554929658 |
| ENSMUSG00000057137 | Tmem140  | 0.000187764 | -1.560331938 |
| ENSMUSG00000026185 | Igfbp5   | 1.44E-15    | -1.569778037 |
| ENSMUSG00000040998 | Npnt     | 0.000186656 | -1.572404224 |
| ENSMUSG00000043501 | Lgals2   | 0.003734182 | -1.575295092 |
| ENSMUSG00000017754 | Pltp     | 0.000259477 | -1.577021384 |
| ENSMUSG00000044197 | Gpr146   | 0.005552227 | -1.585873126 |
| ENSMUSG00000031517 | Gpm6a    | 0.001141349 | -1.589269089 |
| ENSMUSG00000021750 | Fam107a  | 0.000461888 | -1.591264686 |
| ENSMUSG00000032246 | Calml4   | 1.08E-06    | -1.594980219 |
| ENSMUSG00000024600 | Slc27a6  | 0.00337415  | -1.595660931 |
| ENSMUSG00000026365 | Cfh      | 0.000179661 | -1.596527333 |
| ENSMUSG00000030785 | Cox6a2   | 2.51E-12    | -1.60008541  |
| ENSMUSG00000023484 | Prph     | 0.000308919 | -1.623065122 |
| ENSMUSG00000028270 | Gbp2     | 0.003864439 | -1.637396796 |
| ENSMUSG00000050395 | Tnfsf15  | 0.012459646 | -1.640974656 |
| ENSMUSG00000030787 | Lyve1    | 0.00567997  | -1.643458344 |
| ENSMUSG00000006586 | Runx1t1  | 1.06E-07    | -1.683775189 |
| ENSMUSG00000026023 | Cdk15    | 0.000204339 | -1.692633149 |
| ENSMUSG00000040026 | Saa3     | 0.021091516 | -1.706380691 |
| ENSMUSG00000074207 | Adh1     | 1.41E-18    | -1.708419619 |
| ENSMUSG00000051262 | Nat8f3   | 0.001101092 | -1.718417126 |
| ENSMUSG00000104713 | Gbp6     | 0.021677014 | -1.722494164 |
| ENSMUSG00000026177 | Slc11a1  | 0.009728083 | -1.734316721 |
| ENSMUSG00000081769 | Gm12216  | 0.021871939 | -1.741461649 |
| ENSMUSG00000023959 | Clic5    | 5.82E-10    | -1.74448768  |
| ENSMUSG00000030218 | Mgp      | 0.003861279 | -1.744607693 |
| ENSMUSG00000052889 | Prkcb    | 0.000944011 | -1.752436746 |
| ENSMUSG00000029287 | Tgfbr3   | 2.38E-06    | -1.75506547  |
| ENSMUSG00000044749 | Abca6    | 4.19E-07    | -1.765684748 |
| ENSMUSG00000037921 | Ddx60    | 0.001283773 | -1.775593203 |
| ENSMUSG00000060548 | Tnfrsf19 | 0.015572687 | -1.783123907 |
| ENSMUSG00000027071 | P2rx3    | 1.84E-11    | -1.804622285 |
| ENSMUSG00000059824 | Dbp      | 0.001119252 | -1.830292814 |
| ENSMUSG00000030064 | Frmd4b   | 2.97E-05    | -1.849342427 |
| ENSMUSG00000044468 | Fam46c   | 0.000830825 | -1.873955755 |
| ENSMUSG00000019848 | Popdc3   | 0.023065363 | -1.896011533 |
| ENSMUSG00000103537 | Gm37838  | 0.004014195 | -1.898382548 |
| ENSMUSG00000079017 | Ifi2712a | 1.88E-13    | -1.901609429 |
| ENSMUSG00000036446 | Lum      | 0.010795991 | -1.921957587 |
| ENSMUSG00000021806 | Nid2     | 0.010617549 | -1.924045503 |

|                    |               |             |              |
|--------------------|---------------|-------------|--------------|
| ENSMUSG00000022766 | Serpind1      | 2.61E-05    | -1.960633216 |
| ENSMUSG00000031722 | Hp            | 3.54E-05    | -1.965014876 |
| ENSMUSG00000068245 | Phf11d        | 0.001644633 | -1.96812426  |
| ENSMUSG00000024164 | C3            | 1.11E-08    | -1.971895568 |
| ENSMUSG00000028150 | Rorc          | 0.000109247 | -1.976740305 |
| ENSMUSG00000090124 | Ugt1a7c       | 2.51E-09    | -1.984255717 |
| ENSMUSG00000046844 | Vat1l         | 2.50E-15    | -1.994371114 |
| ENSMUSG00000024610 | Cd74          | 0.030676151 | -1.995206185 |
| ENSMUSG00000032718 | Mansc1        | 0.017539177 | -2.006481213 |
| ENSMUSG00000038725 | Pkhd1l1       | 0.027157128 | -2.058763202 |
| ENSMUSG00000027514 | Zbp1          | 0.00852395  | -2.085637736 |
| ENSMUSG00000038370 | Pcp4l1        | 0.000723395 | -2.101163362 |
| ENSMUSG00000023047 | Amhr2         | 0.010758725 | -2.106161678 |
| ENSMUSG00000020911 | Krt19         | 0.017506518 | -2.107779174 |
| ENSMUSG00000081272 | Gm13509       | 0.039030393 | -2.119974514 |
| ENSMUSG00000108691 | Gm45226       | 0.001440156 | -2.13435511  |
| ENSMUSG00000036502 | Tmem255a      | 0.027542358 | -2.143557316 |
| ENSMUSG00000026676 | Ccdc3         | 0.020370398 | -2.148907555 |
| ENSMUSG00000040747 | Cd53          | 7.48E-10    | -2.14965931  |
| ENSMUSG00000029167 | Ppargc1a      | 1.17E-06    | -2.168133651 |
| ENSMUSG00000091649 | Phf11b        | 0.001041737 | -2.171227024 |
| ENSMUSG00000079363 | Gbp4          | 0.013841483 | -2.20627109  |
| ENSMUSG00000060882 | Kcnd2         | 0.00028512  | -2.223397931 |
| ENSMUSG00000024806 | Mlana         | 0.000875729 | -2.25884421  |
| ENSMUSG00000072941 | Sod3          | 1.29E-11    | -2.260111382 |
| ENSMUSG00000041757 | Plekha6       | 1.20E-06    | -2.264788887 |
| ENSMUSG00000001119 | Col6a1        | 0.009919994 | -2.280898202 |
| ENSMUSG00000096606 | Tpbgl         | 0.000305994 | -2.301431418 |
| ENSMUSG00000105096 | Gbp10         | 0.000241906 | -2.31786336  |
| ENSMUSG00000017002 | Slpi          | 1.09E-05    | -2.339290138 |
| ENSMUSG00000022340 | Sybu          | 0.000944393 | -2.398624101 |
| ENSMUSG00000046805 | Mpeg1         | 5.85E-06    | -2.434610638 |
| ENSMUSG00000021895 | Arhgef3       | 0.000214742 | -2.462371428 |
| ENSMUSG00000051041 | Olfml1        | 0.006135869 | -2.462771156 |
| ENSMUSG00000057092 | Fxyd3         | 0.005605704 | -2.487188993 |
| ENSMUSG00000058624 | Gda           | 1.22E-05    | -2.562632007 |
| ENSMUSG00000021214 | Akr1c18       | 3.26E-18    | -2.575874409 |
| ENSMUSG00000099009 | Rdh16f1       | 0.04787606  | -2.600752935 |
| ENSMUSG00000020241 | Col6a2        | 5.50E-05    | -2.606313088 |
| ENSMUSG00000040703 | Cyp2s1        | 0.000219459 | -2.624402785 |
| ENSMUSG00000024292 | Cyp4f14       | 1.46E-06    | -2.778803061 |
| ENSMUSG00000029816 | Gpnmb         | 7.06E-08    | -2.780860976 |
| ENSMUSG00000091703 | Gm4222        | 1.21E-07    | -2.796984956 |
| ENSMUSG00000048489 | 8430408G22Rik | 1.08E-08    | -2.820447319 |
| ENSMUSG00000089675 | Ugt1a8        | 0.034487284 | -2.821238819 |
| ENSMUSG00000092021 | Gbp11         | 5.52E-08    | -2.843712017 |
| ENSMUSG00000074365 | Crxos         | 1.85E-14    | -2.931673268 |

|                    |            |             |              |
|--------------------|------------|-------------|--------------|
| ENSMUSG00000052974 | Cyp2f2     | 6.95E-05    | -2.961032884 |
| ENSMUSG00000089960 | Ugt1a1     | 0.001526291 | -3.043417332 |
| ENSMUSG00000079362 | Gm43302    | 0.044041533 | -3.126225763 |
| ENSMUSG00000045886 | Gm9803     | 0.014120798 | -3.536724449 |
| ENSMUSG00000027895 | Kcnc4      | 0.000223526 | -3.876245629 |
| ENSMUSG00000116461 | AC137513.1 | 0.002957763 | -4.037559589 |
