# Supplementary material
Source: PubMed Central journal article supplement (PMC6877777)
Supplement: supplemental_tables_2-3_ioz134.pdf [file supplemental_tables_2-3_ioz134.pdf]

**Supplemental Table 2: RT-PCR Primer Sequences.**

| <b>Gene</b>  | <b>Species</b> | <b>Primer Sequence (5'-3')</b>                                                          |
|--------------|----------------|-----------------------------------------------------------------------------------------|
| <i>Snail</i> | Mouse          | Forward - GTC TGC ACG ACC TGT GGA A<br>Reverse - CAG GAG AAT GGC TTC TCA CC             |
| <i>Krt19</i> | Mouse          | Forward - TGA CCT GGA GAT GCA GAT TG<br>Reverse - CCT CAG GGC AGT AAT TTC CTC           |
| <i>Zeb1</i>  | Mouse          | Forward - GCC AGC AGT CAT GAT GAA AA<br>Reverse - TAT CAC AAT ACG GGC AGG TG            |
| <i>Alcam</i> | Mouse          | Forward - AAA CTC CCT GAA TGT CTC TGC<br>Reverse - AGA CCA ACG ACA ATT CCC AC           |
| <i>Twist</i> | Mouse          | Forward - AGC TAC GCC TTC TCC GTC T<br>Reverse - TCC TTC TCT GGA AAC AAT GAC A          |
| <i>Cox2</i>  | Mouse          | Forward - CAA AAG AAG TGC TGG AAA AGG T<br>Reverse - GGA TGA ACT CTC TCC GTA GAA GA     |
| <i>TBP</i>   | Mouse          | Forward - GGC GGT TTG GCT AGG TTT<br>Reverse - GGG TTA TCT TCA CAC ACC ATG A            |
| <i>SNAIL</i> | Human          | Forward - GCT GCA GGA CTC TAA TCC AGA<br>Reverse - ATC TCC GGA GGT GGG ATG              |
| <i>COX2</i>  | Human          | Forward - CTT CAC GCA TCA GTT TTT CAA G<br>Reverse - TCA CCG TAA ATA TGA TTT AAG TCC AC |
| <i>TBP</i>   | Human          | Forward - GAA CAT CAT GGA TCA GAA CAA CA<br>Reverse - ATA GGG ATT CCG GGA GTC AT        |

**Supplemental Table 3: Western blot antibody conditions**

| Primary Antibody                                                                                                                                                                                                                                                   |                                                   | Secondary Antibody                                                                                    |                                                          |
|--------------------------------------------------------------------------------------------------------------------------------------------------------------------------------------------------------------------------------------------------------------------|---------------------------------------------------|-------------------------------------------------------------------------------------------------------|----------------------------------------------------------|
| Antibody Details                                                                                                                                                                                                                                                   | Incubation Details                                | Antibody Details                                                                                      | Incubation Details                                       |
| <p>Rabbit anti-Snail (Abcam, ab82846)<br/> RRID AB_1861654<br/> Lot number: GR143900-1<br/> Negative control: untreated im<i>Snail</i> mOSE cells<br/> Positive control: 200 ng/mL doxycycline treated im<i>Snail</i> mOSE cells<br/> Molecular weight: 29 kDa</p> | <p>1:500 in 5% non-fat milk overnight, 4 °C</p>   | <p>Donkey anti-Rabbit IgG HRP conjugated (GE Healthcare Life Sciences, NA934)<br/> RRID AB_772206</p> | <p>1:5,000 in 5% non-fat milk 1 hr, room temperature</p> |
| <p>Mouse anti-Cdh1 (BD Transduction Laboratories, 610182)<br/> RRID AB_397581<br/> Lot number: 4020982<br/> Negative control: mOSE cells treated with TGFB1 (10 ng/mL 96 hr)<br/> Positive control: mOSE cells untreated<br/> Molecular weight: 97 kDa</p>         | <p>1:5,000 in 5% non-fat milk overnight, 4 °C</p> | <p>Goat anti-Mouse IgG HRP conjugated (Abcam, ab6728)<br/> RRID AB_955440</p>                         | <p>1:5,000 in 5% non-fat milk 1 hr, room temperature</p> |
| <p>Rabbit anti-PSmad2 (NEB Cell Signaling, 3101S)<br/> RRID AB_331673<br/> Lot number: 11<br/> Negative control: mOSE cells untreated<br/> Positive control: mOSE cells treated with TGFB1 (10 ng/mL 6 hr)<br/> Molecular weight: 60 kDa</p>                       | <p>1:1,000 in 5% BSA overnight, 4 °C</p>          | <p>Donkey anti-Rabbit IgG HRP conjugated (GE Healthcare Life Sciences, NA934)<br/> RRID AB_772206</p> | <p>1:2,000 in 5% non-fat milk 1 hr, room temperature</p> |
| <p>Rabbit anti-PSmad3 (NEB Cell Signaling, 9520S)<br/> RRID AB_2193207<br/> Lot number: 12<br/> Negative control: mOSE cells untreated</p>                                                                                                                         | <p>1:500 in 5% BSA overnight, 4 °C</p>            | <p>Donkey anti-Rabbit IgG HRP conjugated (GE Healthcare Life Sciences, NA934)<br/> RRID AB_772206</p> | <p>1:2,000 in 5% non-fat milk 1 hr, room temperature</p> |

|                                                                                                                                                                                                                                                                                                                                       |                                                           |                                                                                                      |                                                           |
|---------------------------------------------------------------------------------------------------------------------------------------------------------------------------------------------------------------------------------------------------------------------------------------------------------------------------------------|-----------------------------------------------------------|------------------------------------------------------------------------------------------------------|-----------------------------------------------------------|
| <p>Positive control: mOSE cells treated with TGFB1 (10 ng/mL 6 hr)<br/>Molecular weight: 50 kDa</p>                                                                                                                                                                                                                                   |                                                           |                                                                                                      |                                                           |
| <p>Rabbit anti-Smad2 (Invitrogen, 511300)<br/>RRID AB_2533896<br/>Lot number: 1344396A<br/>Negative control: N/A<br/>Positive control: mOSE cells untreated<br/>Molecular weight: 60 kDa</p>                                                                                                                                          | <p>1.0 µg/mL in 5% non-fat milk overnight, 4 °C</p>       | <p>Donkey anti-Rabbit IgG HRP conjugated (GE Healthcare Life Sciences, NA934)<br/>RRID AB_772206</p> | <p>1:5,000 in 5% non-fat milk 1 hr, room temperature</p>  |
| <p>Rabbit anti-Smad3 (Invitrogen, 511500)<br/>RRID AB_2533897<br/>Lot number: 1267151A<br/>Negative control: N/A<br/>Positive control: mOSE cells untreated<br/>Molecular weight: 48 kDa</p>                                                                                                                                          | <p>1.25 µg/mL in 5% non-fat milk overnight, 4 °C</p>      | <p>Donkey anti-Rabbit IgG HRP conjugated (GE Healthcare Life Sciences, NA934)<br/>RRID AB_772206</p> | <p>1:5,000 in 5% non-fat milk 1 hr, room temperature</p>  |
| <p>Rabbit anti-Cox2 (Abcam, ab15191)<br/>RRID AB_2085144<br/>Lot number: GR164486-2<br/>Negative control (western blot): N/A<br/>Negative control (IHC): mOSE cells around non-ovulating sites<br/>Positive control (western blot): mOSE cells untreated<br/>Positive control (IHC): Granulosa cells<br/>Molecular weight: 69 kDa</p> | <p>1:1,000 in 5% non-fat milk overnight, 4 °C</p>         | <p>Donkey anti-Rabbit IgG HRP conjugated (GE Healthcare Life Sciences, NA934)<br/>RRID AB_772206</p> | <p>1:5,000 in 5% non-fat milk 1 hr, room temperature</p>  |
| <p>Mouse anti-β-Actin (Sigma, A2228)<br/>RRID AB_476697<br/>Lot number: 096M4855V<br/>Negative control: N/A<br/>Positive control: mOSE cells untreated<br/>Molecular weight: 42 kDa</p>                                                                                                                                               | <p>1:80,000 in 5% non-fat milk 1 hr, room temperature</p> | <p>Goat anti-Mouse IgG HRP conjugated (Abcam, ab6728)<br/>RRID AB_955440</p>                         | <p>1:20,000 in 5% non-fat milk 1 hr, room temperature</p> |
| <p>Mouse anti-GAPDH (Abcam,</p>                                                                                                                                                                                                                                                                                                       | <p>1:80,000 in 5%</p>                                     | <p>Goat anti-Mouse IgG</p>                                                                           | <p>1:20,000 in 5%</p>                                     |

|                                                                                                                                                                                                       |                                                             |                                                                                                                      |                                                                         |
|-------------------------------------------------------------------------------------------------------------------------------------------------------------------------------------------------------|-------------------------------------------------------------|----------------------------------------------------------------------------------------------------------------------|-------------------------------------------------------------------------|
| <p>ab8245)<br/> RRID AB_2107448<br/> Lot number: 168317<br/> Negative control: N/A<br/> Positive control: mOSE cells<br/> untreated<br/> Molecular weight: 35 kDa</p>                                 | <p>non-fat milk 1<br/> hr, room<br/> temperature</p>        | <p>HRP conjugated<br/> (Abcam, ab6728)<br/> RRID AB_955440</p>                                                       | <p>non-fat milk 1<br/> hr, room<br/> temperature</p>                    |
| <p>Rabbit anti-AKT (Cell<br/> Signaling, 9272S)<br/> RRID AB_329827<br/> Lot number: 27<br/> Negative control: N/A<br/> Positive control: mOSE cells<br/> untreated<br/> Molecular weight: 56 kDa</p> | <p>1:1,000 in 5%<br/> non-fat milk<br/> overnight, 4 °C</p> | <p>Donkey anti-Rabbit IgG<br/> HRP conjugated (GE<br/> Healthcare Life<br/> Sciences, NA934)<br/> RRID AB_772206</p> | <p>1:5,000 in 5%<br/> non-fat milk 1<br/> hr, room<br/> temperature</p> |
| <p>Rabbit anti-AKT (Cell<br/> Signaling, 9271S)<br/> RRID AB_329825<br/> Lot number: 14<br/> Negative control: N/A<br/> Positive control: mOSE cells<br/> untreated<br/> Molecular weight: 60 kDa</p> | <p>1:1,000 in 5%<br/> BSA overnight,<br/> 4 °C</p>          | <p>Donkey anti-Rabbit IgG<br/> HRP conjugated (GE<br/> Healthcare Life<br/> Sciences, NA934)<br/> RRID AB_772206</p> | <p>1:5,000 in 5%<br/> non-fat milk 1<br/> hr, room<br/> temperature</p> |
