# Supplementary material
Source: PubMed Central journal article supplement (PMC6877777)

ZO1 DAPI

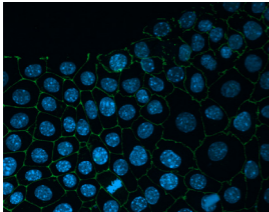

CTNNB1 DAPI

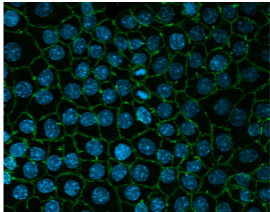

Supplement: bor_figure_s1_ioz134.pdf [file bor_figure_s1_ioz134.pdf]

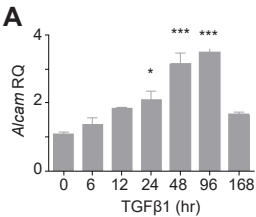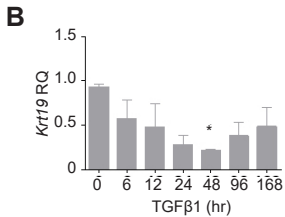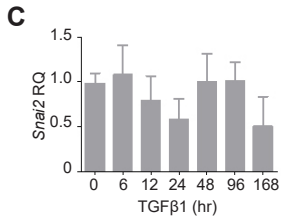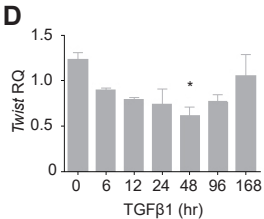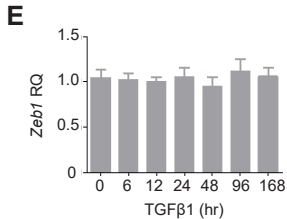

Supplement: bor_figure_s2_ioz134.pdf [file bor_figure_s2_ioz134.pdf]

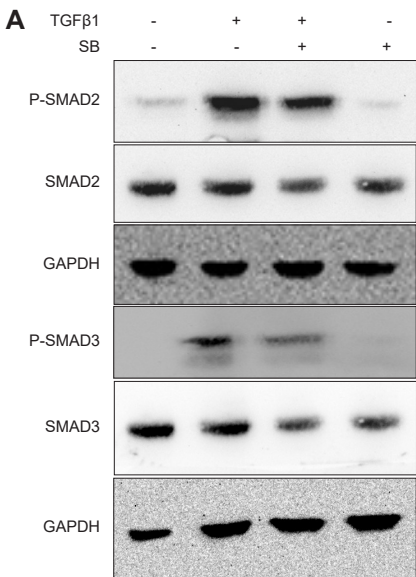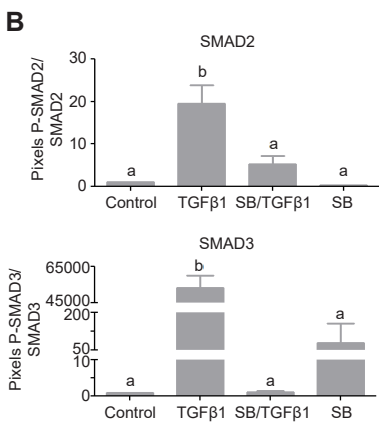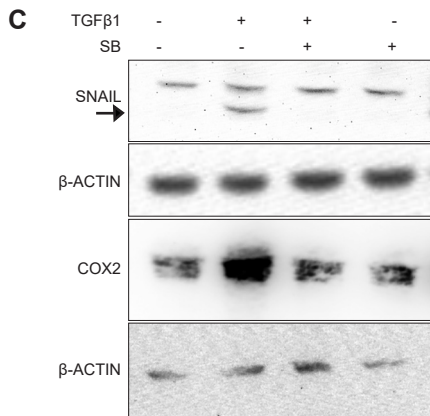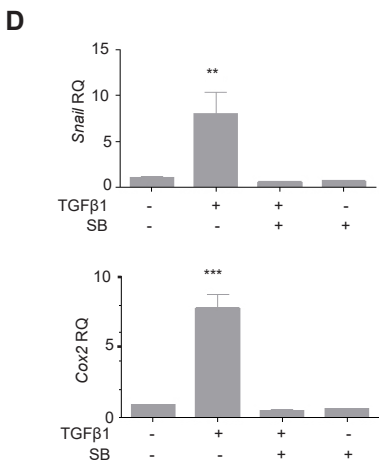

Supplement: bor_figure_s3_ioz134.pdf [file bor_figure_s3_ioz134.pdf]

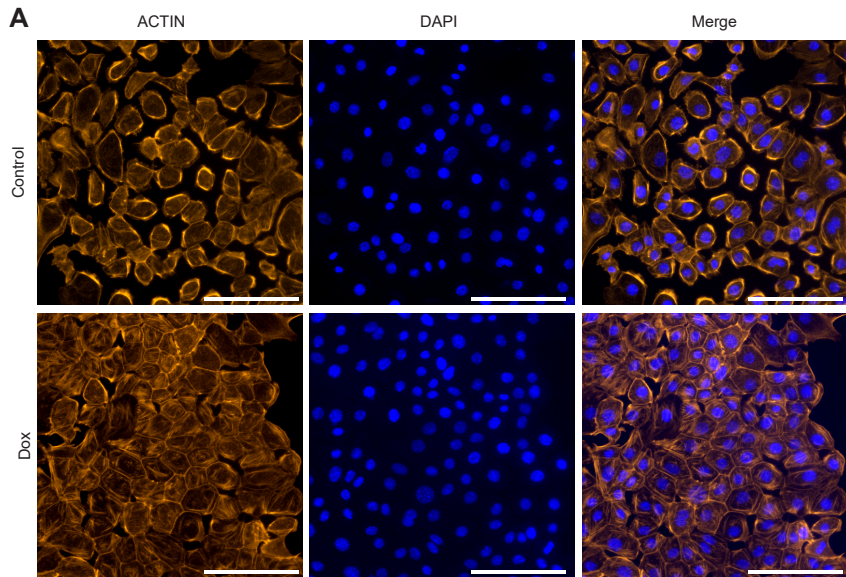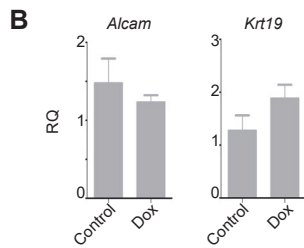

Supplement: bor_figure_s4_ioz134.pdf [file bor_figure_s4_ioz134.pdf]

**A**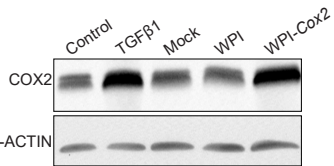**B**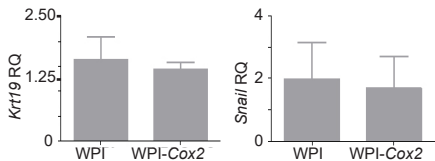**C**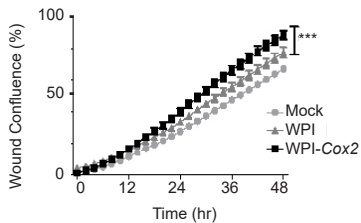

Supplement: bor_figure_s5_ioz134.pdf [file bor_figure_s5_ioz134.pdf]

**A**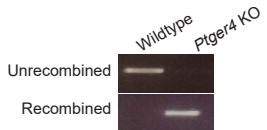**B**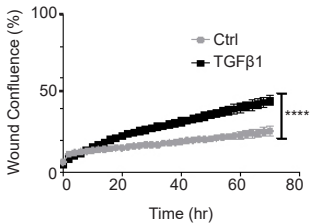

Supplement: bor_figure_s6_ioz134.pdf [file bor_figure_s6_ioz134.pdf]

**A**

Control

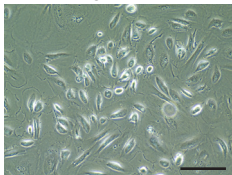TGF $\beta$ 1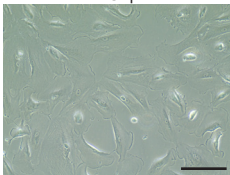**B**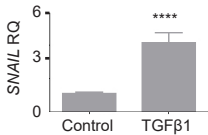**C**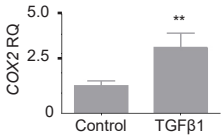

Supplement: bor_figure_s7_ioz134.pdf [file bor_figure_s7_ioz134.pdf]

- Translocation
- Transcription
- Energetic reaction
- Enzymatic reaction
- Interaction

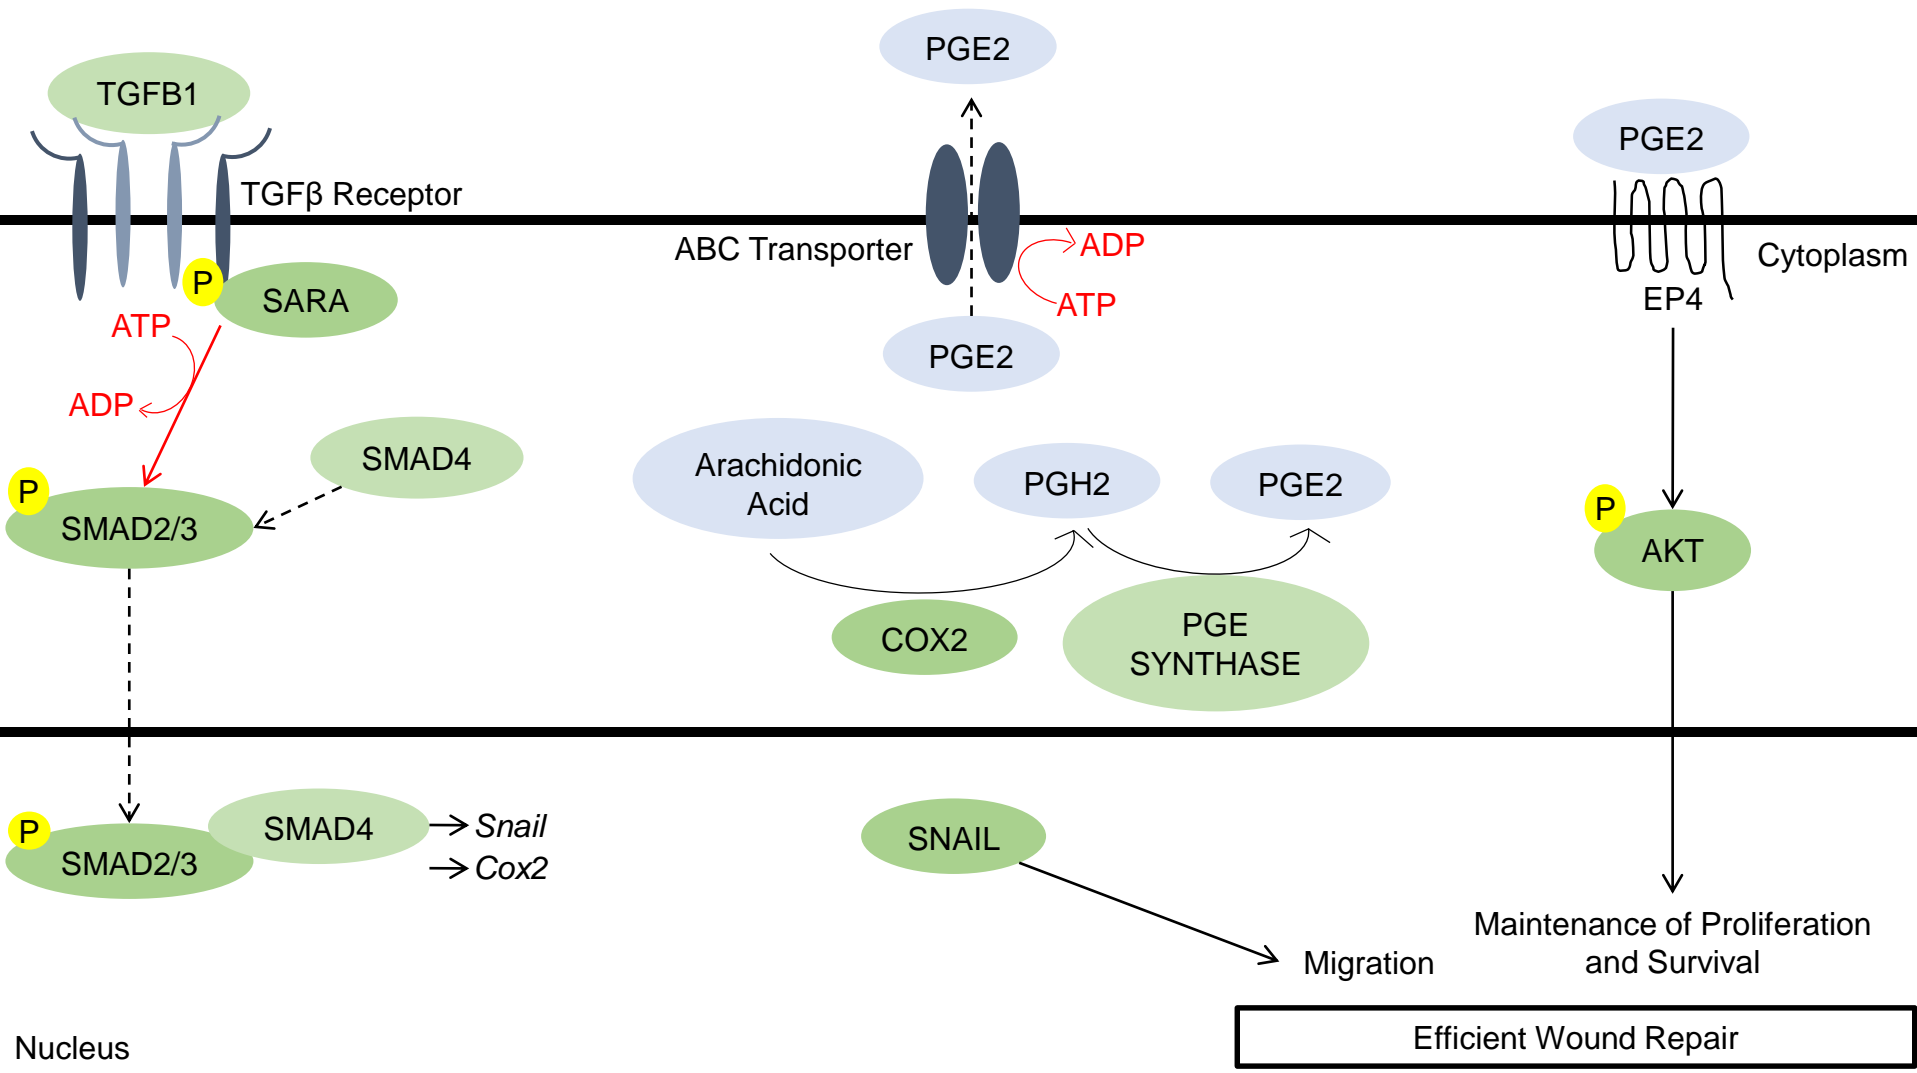

Supplement: bor_figure_s8_ioz134.pdf [file bor_figure_s8_ioz134.pdf]
